# Supplementary material for: Collaborative design of a decision aid for stroke survivors with multimorbidity: a qualitative study in the UK engaging key stakeholders
Source: PubMed Central journal article supplement (PMC6701575; doi:10.1136/bmjopen-2019-030385), 2019-08-15
Supplement: bmjopen-2019-030385.draft_revisions.pdf [file bmjopen-2019-030385.draft_revisions.pdf]

# BMJ Open

BMJ Open is committed to open peer review. As part of this commitment we make the peer review history of every article we publish publicly available.

When an article is published we post the peer reviewers' comments and the authors' responses online. We also post the versions of the paper that were used during peer review. These are the versions that the peer review comments apply to.

The versions of the paper that follow are the versions that were submitted during the peer review process. They are not the versions of record or the final published versions. They should not be cited or distributed as the published version of this manuscript.

BMJ Open is an open access journal and the full, final, typeset and author-corrected version of record of the manuscript is available on our site with no access controls, subscription charges or pay-per-view fees (<http://bmjopen.bmj.com>).

If you have any questions on BMJ Open's open peer review process please email [info.bmjopen@bmj.com](mailto:info.bmjopen@bmj.com)

# BMJ Open

## Collaborative design of a decision aid for stroke survivors: a qualitative study engaging patients, healthcare professionals, policy-makers and researchers

|                               |                                                                                                                                                                                                                                                                                                                                                                                                                                                                                                                  |
|-------------------------------|------------------------------------------------------------------------------------------------------------------------------------------------------------------------------------------------------------------------------------------------------------------------------------------------------------------------------------------------------------------------------------------------------------------------------------------------------------------------------------------------------------------|
| Journal:                      | <i>BMJ Open</i>                                                                                                                                                                                                                                                                                                                                                                                                                                                                                                  |
| Manuscript ID                 | bmjopen-2019-030385                                                                                                                                                                                                                                                                                                                                                                                                                                                                                              |
| Article Type:                 | Research                                                                                                                                                                                                                                                                                                                                                                                                                                                                                                         |
| Date Submitted by the Author: | 11-Mar-2019                                                                                                                                                                                                                                                                                                                                                                                                                                                                                                      |
| Complete List of Authors:     | <p>Porat, Talya; Imperial College London, Dyson School of Design Engineering</p> <p>Marshall, Iain; King's College London,</p> <p>Sadler, Euan; Kings College London, Department of Primary Care and Public Health Sciences</p> <p>Vadillo, Miguel</p> <p>McKevitt, Christopher; King's College London, Department of Public Health Sciences</p> <p>Wolfe, Charles; Kings College London, Health and Social Care Research</p> <p>Curcin, Vasa; Kings College London, Primary Care and Public Health Sciences</p> |
| Keywords:                     | STROKE MEDICINE, PRIMARY CARE, Learning Health System, Shared Decision Making, Decision Support System, Stakeholder Engagment                                                                                                                                                                                                                                                                                                                                                                                    |
|                               |                                                                                                                                                                                                                                                                                                                                                                                                                                                                                                                  |

SCHOLARONE™  
Manuscripts

1  
2  
3  
4  
5  
6  
7  
8  
9  
10  
11  
12  
13  
14  
15  
16  
17  
18  
19  
20  
21  
22  
23  
24  
25  
26  
27  
28  
29  
30  
31  
32  
33  
34  
35  
36  
37  
38  
39  
40  
41  
42  
43  
44  
45  
46  
47  
48  
49  
50  
51  
52  
53  
54  
55  
56  
57  
58  
59  
60

**Collaborative design of a decision aid for stroke survivors: a qualitative study engaging patients, healthcare professionals, policy-makers and researchers**

Talya Porat<sup>\*1,2,3</sup>, Iain Marshall<sup>2,3</sup>, Euan Sadler<sup>2,4</sup>, Miguel A. Vadillo<sup>2</sup>, Christopher McKeivitt<sup>2,3,5</sup>, Charles D A Wolfe<sup>2,3,5</sup>, Vasa Curcin<sup>2,3,5</sup>

<sup>1</sup> Dyson School of Design Engineering, Faculty of Engineering, Imperial College London, London, UK

<sup>2</sup> School of Population Health and Environmental Sciences, Faculty of Life Sciences and Medicine, King's College London, London, UK

<sup>3</sup> National Institute for Health Research (NIHR) Collaboration for Leadership in Applied Health Research and Care South London, London, UK

<sup>4</sup> Health Service and Population Research Department, King's Improvement Science, Centre for Implementation Science, Institute of Psychiatry, Psychology and Neuroscience, King's College London, London, UK

<sup>5</sup> National Institute for Health Research (NIHR) Biomedical Research Centre at Guy's and St Thomas' NHS Foundation Trust and King's College London, Tower Wing Guy's Hospital, London, UK.

**\*Corresponding author:**

Dr Talya Porat  
Imperial College London  
Dyson School of Design Engineering  
Imperial College Road  
South Kensington  
London, SW7 2DB  
Tel: +44 (0)20 7594 7381  
[t.porat@imperial.ac.uk](mailto:t.porat@imperial.ac.uk)

## ABSTRACT

**Objectives:** Effective secondary stroke prevention strategies are sub-optimally used, and hence, developing interventions to enable healthcare professionals and stroke survivors to manage risk factors for stroke recurrence more effectively are required. We sought to engage various stakeholders in the design and evaluation of an intervention that adopts a Learning Health System approach to improve risk factors management and secondary stroke prevention in primary care.

**Design:** Qualitative, including focus groups, semi-structured interviews and usability evaluations. Data was recorded, transcribed, and coded thematically.

**Participants:** Stroke survivors, carers, health and social care professionals, commissioners, policy-makers and researchers.

**Setting:** Stroke survivors and carers were recruited from the South London Stroke Register, health and social care professionals from South London practices, researchers, commissioners and policy-makers from King's College London networks.

**Results:** 53 stakeholders in total participated in focus groups, interviews and usability evaluations. Thirty-seven participated in focus groups and interviews, including stroke survivors and carers (N=11), health and social care professionals (N=16), commissioners and policy-makers (N=6) and researchers (N=4). Sixteen participated in usability evaluations, including stroke survivors (N=8) and general practitioners (GPs; N=8). Eight identified themes informed the collaborative design of DOTT (Deciding on Treatments Together), a decision aid integrated with the electronic health record system, to be used in primary care during clinical consultations between the healthcare professional and stroke survivor. DOTT aims to facilitate shared decision making on personalised treatments leading to improved treatment adherence and risk control. DOTT was found acceptable and usable to stroke survivors and GPs during a series of evaluations.

**Conclusions:** Adopting a user-centred data-driven design approach informed an intervention that is acceptable to users and has the potential to improve patient outcomes. A future feasibility study and subsequent clinical trial will provide evidence of the effectiveness of DOTT in reducing risk of stroke recurrence.

## STRENGTHS AND LIMITATIONS OF THIS STUDY

- Engaging various stakeholders in the design of an intervention ensures that the intervention is in line with the needs reported by the different stakeholders (stroke survivors, healthcare professionals and policy-makers).
- Adopting a Learning Health System approach enables the delivery of personalised recommendations in real time while simultaneously capturing additional data back into the system, in order to improve the system's predictive model and recommendations.
- Only stroke survivors who were able to attend the focus groups could participate in the study, we did not elicit the views of stroke survivors who are less mobile or housebound.

## INTRODUCTION

Stroke is the second leading cause of death and a major cause of disability worldwide.<sup>1</sup> In 2015, there were 3.7 million people living with stroke as a chronic condition in Europe and this number is expected to reach 4.6 million in 2035.<sup>2</sup> Stroke survivors have a nearly 40% cumulative risk of recurrence during the first 10 years after stroke.<sup>3</sup> Secondary stroke prevention requires healthcare professionals to offer appropriate and effective interventions to monitor and manage risk factors, and for patients to change health related behaviours (e.g., smoking)<sup>4</sup> and adhere to preventative medications (e.g., to control hypertension).<sup>5</sup> Follow-up appointments with clinicians offer opportunities to discuss interventions for reducing the risk of future stroke among patients with multimorbidity. However, long-term stroke care is characterised by a lack of continuity<sup>6</sup> and modifiable risk factors are currently not well detected, managed or controlled post stroke.<sup>7</sup>

Interventions designed to improve risk-factor management among stroke survivors in randomised controlled trials (RCTs) have shown modest or no effect. A recent Cochrane systematic review of 42 RCTs evaluating the effectiveness of educational and behavioural or organisational interventions on modifiable risk factor control for secondary prevention of stroke,<sup>8</sup> found no clear benefit in any of the target outcomes (i.e., blood pressure, lipid profile, HbA1c, BMI and recurrent cardiovascular events). Possible reasons could be that these interventions have not been part of the clinical decision-making process of clinicians, did not engage various stakeholders in the design of the intervention, and were not integrated with the Electronic Health Record (EHR) (except for one<sup>9</sup>) - all of which are considered critical features of successful clinical decision support systems.<sup>10,11</sup>

Improving long-term stroke care is a complex endeavour that requires high quality up-to-date information both to plan treatments for individual patients and to guide best practice for the stroke population in general.<sup>12</sup> The 'Learning Health System' (LHS) approach is based on routine collection, management, and analysis of the vast amounts of clinical data produced by health providers and patients.<sup>13</sup> LHS outputs can then provide tailored information on optimal care decisions and be delivered at the point of clinical care.<sup>14</sup> Decision support systems (DSS) implement this transfer of evidence into practice, particularly when coupled with sources of 'Real World Data'<sup>15</sup> such as EHR systems that capture detailed data on specific conditions. Such point-of-care DSS support a range of applications, including patient risk estimation, guidance on the appropriateness of treatments, and tailor clinical information to specific patient needs - providing the right care to the right patient at the right time.<sup>14</sup>

Patients are expecting to be informed and involved in the process of care.<sup>17</sup> This shift from imposition of professional opinion towards collaboration is not only relevant when people face difficult decisions, where there are high stakes and where outcomes are uncertain, but also in situations where people need to manage long term conditions or might want to consider making changes in their lifestyles in order to reduce future risks.<sup>18</sup> Such shared decision making (SDM) respects patient values and preferences, and supports decision-making through the provision of high-quality, accessible information.<sup>19</sup> SDM has been found to be most effective if interventions are developed for use during the clinical encounter,<sup>20</sup> and several DSS that have been designed to facilitate SDM during the consultation (i.e., decision aids) have shown improved treatment adherence and clinical outcomes in patients with chronic conditions such as asthma and diabetes.<sup>21,22</sup>

1  
2  
3 In his seminal analysis, Berg criticised the 'top-down' technology centred approach to designing  
4 decision support systems.<sup>16</sup> He described an alternative *socio-technical* approach, where new tools  
5 needed to be designed taking into account the real-world complex networks of people involved in  
6 health care, and designed using an iterative approach which makes strong use of qualitative research  
7 with users.  
8  
9

10 We propose engaging various stakeholders in designing LHS interventions to manage risk factors more  
11 effectively, using integrated and real-time data, and based on principles of Shared Decision Making  
12 (SDM). In the present study, we engaged a range of stakeholders in the identification and design of an  
13 intervention to improve secondary prevention after stroke. The data supporting these intervention  
14 are linked datasets from the South London Stroke Register (SLSR),<sup>23</sup> which includes more than 6,000  
15 records of first-ever strokes that occur in South London, and Lambeth Datanet (LDN)<sup>24</sup> containing  
16 primary care data of local general practices in South London. The linked data provides detailed  
17 phenotypic data on patients and their provision of care.  
18  
19  
20  
21

## 22 **METHOD**

### 23 **Patient and public involvement**

24 The focus group topic guide was informed by helpful feedback from stroke survivors recruited from  
25 SLSR. Stroke survivors, carers, health and social care professionals, commissioners and policy-makers  
26 were all involved throughout the study in a collaborative design process of an intervention for stroke  
27 survivors.  
28  
29  
30  
31

### 32 **Data collection**

33 We used a range of methods to engage stakeholders (N=53) in the design and evaluation of the  
34 intervention, including focus groups, interviews and usability evaluations. The process involved three  
35 main stages: (1) exploring stakeholder priorities for data and information needs to inform potential  
36 solutions for long-term stroke care; (2) collaborative design of the selected intervention with  
37 stakeholders, comprising cycles of design, prototyping and evaluation; (3) Usability and acceptability  
38 evaluation of the DSS prototype. 37 stakeholders participated in the first two stages, including stroke  
39 survivors and carers (N=11), health and social care professionals (N=16), commissioners and policy-  
40 makers (N=6) and researchers (N=4). 16 stakeholders participated in the third stage, including 8 stroke  
41 survivors and 8 GPs. Stroke survivors and carers were recruited from SLSR, health and social care  
42 professionals from South London practices, researchers, commissioners and policy-makers from  
43 King's College London networks. See Table 1 for details of all stakeholders taking part in the study.  
44 Participants could take part in the study if they were able to attend the meetings and were willing to  
45 sign a consent form.  
46  
47  
48  
49  
50  
51

### 52 **Stage 1: Exploring stakeholder priorities for data and information needs**

53 In total, 37 stakeholders participated in this stage. Two focus groups, the first comprising 24  
54 participants (FG1) and the second 12 participants (FG2), as well as 9 face-to-face interviews were  
55 conducted to explore stakeholders' priorities for clinical data to inform possible interventions to  
56 improve long-term care for stroke survivors with multimorbidity (some participants took part on  
57 multiple occasions). All participants signed a consent form. Four ideas for interventions were  
58 informed: 1) Improving continuity of care; 2) Improving management of mental health consequences;  
59  
60

3) Better access to health and social care; and 4) Targeting multiple risk factors. A third focus group with the core stakeholder group (N=10) (FG3) then took place to seek feedback on the proposed interventions. From this process, a DSS to improve secondary stroke prevention was selected for further development. Full details of the method for this stage have been published elsewhere.<sup>12</sup>

## Stage 2: Collaborative design and prototyping of selected intervention

The initial design of the DSS was informed by the first stage and guided by the International Patient Decision Aids Standards<sup>18</sup> and the SDM model for clinical practice.<sup>25</sup> Following feedback from the core stakeholder group at the third focus group meeting above (FG3), an updated design of the intervention was subsequently reviewed by the core stakeholder group at a fourth focus group (N=9) (FG4) and was revised following their feedback. The DSS was also presented to the King's College London's Stroke Research Patient and Family Group (SRPFG)<sup>26</sup>, comprising 32 participants including stroke survivors and carers (22 members participated in the meeting) from the SLSR from diverse socio-economic and ethnic backgrounds, who meet once every 6 weeks to discuss and provide feedback to researchers conducting stroke research. The intervention was revised and the updated design was developed as a basic prototype and was further discussed during a subsequent focus group with the core stakeholder group (N=9) (FG5) and the SRPFG. This process allowed all stakeholders to iteratively develop and refine the DSS to a working prototype.

## Stage 3: Usability and acceptability evaluation of the DSS

Sixteen participants, including eight stroke survivors and eight GPs participated in the usability and acceptability evaluation of the working prototype of the DSS. All 16 participants did not take part in the previous stages of the study.

The evaluation included simulated consultations using the DSS prototype. In the GPs session, the researcher acted as the patient, and in the stroke patient's session, the researcher acted as the GP. GPs were given a short tutorial on how to use the DSS before the simulated consultations and stroke survivors were given a short explanation about the DSS. GPs and stroke survivors were interviewed after the simulated consultation and also answered an acceptability questionnaire<sup>27</sup> and the System Usability Scale.<sup>28</sup> Ratings were provided on 5-point Likert scales from 1 (strongly disagree) to 5 (strongly agree), with higher ratings indicating higher satisfaction.

**Table 1. Stakeholders taking part in the study**

| Type of stakeholder                        | FG1<br>(N=24) | FG2<br>(N=12) | FG3<br>(N=10) | FG4<br>(N=9) | FG5<br>(N=9) | Interviews<br>(N=9) | Usability<br>evaluation<br>(N=16) | Total<br>(N=53*) |
|--------------------------------------------|---------------|---------------|---------------|--------------|--------------|---------------------|-----------------------------------|------------------|
| <b>Stroke survivor</b>                     | 10            | 2             | 2             | 2            | 2            |                     | 8                                 | <b>18</b>        |
| <b>Carer</b>                               | 1             | 1             | 1             | 1            | 1            |                     |                                   | <b>1</b>         |
| <b>Health and social care professional</b> | <b>8</b>      | <b>3</b>      | <b>2</b>      | <b>2</b>     | <b>2</b>     | <b>7</b>            | <b>8</b>                          | <b>24</b>        |
| GP                                         | 2             | 1             | 1             | 1            | 1            | 5                   | 8                                 | 15               |
| Physiotherapist                            | 2             | 1             |               |              |              |                     |                                   | 2                |
| Speech and language therapist              | 1             |               |               |              |              |                     |                                   | 1                |
| Social care professional                   | 1             |               |               |              |              |                     |                                   | 1                |
| Public health doctor                       | 1             |               |               |              |              |                     |                                   | 1                |
| Consultant psychiatrist                    | 1             |               |               |              |              |                     |                                   | 1                |
| Occupational therapist                     |               | 1             | 1             | 1            | 1            |                     |                                   | 1                |
| Acute stroke care consultant               |               |               |               |              |              | 2                   |                                   | 2                |
| <b>Policy makers and commissioners</b>     | <b>3</b>      | <b>2</b>      | <b>2</b>      | <b>2</b>     | <b>2</b>     | <b>2</b>            |                                   | <b>6</b>         |

|   |                                     |   |   |   |   |          |
|---|-------------------------------------|---|---|---|---|----------|
| 1 |                                     |   |   |   |   |          |
| 2 |                                     |   |   |   |   |          |
| 3 | <b>Third sector representatives</b> | 2 |   |   |   | <b>2</b> |
| 4 | <b>Academic researchers</b> (social |   | 4 | 3 | 2 | <b>4</b> |
| 5 | scientist, researchers working with |   |   |   |   |          |
| 6 | SLSR/LDN databases)                 |   |   |   |   |          |
| 7 |                                     |   |   |   |   |          |

## Notes:

1. \*Overall 53 participants took part in the study, but a number of stakeholders took part on multiple occasions.
2. King's College London's Stroke Research Patient and Family Group (SRPFG) comprising 22 (out of 32) stroke survivors and carers also provided feedback on the design of the intervention in two of their meetings.

## Data Analysis

Data from focus groups, interviews and usability evaluations were audio recorded, transcribed in full and stored in NVivo (Version 11). Qualitative data were analysed using a thematic analysis approach<sup>29</sup> for themes related to stakeholder perspectives informing the identification, design and evaluation of a DSS to improve secondary prevention for stroke survivors, which could be part of a LHS. This involved two authors (TP,ES) assigning codes and developing and refining themes and subthemes from the data.

## RESULTS

### Focus groups and interviews

Eight themes (requirements from a DSS) were identified from focus groups and interviews:

#### 1. Involve stroke survivors in decisions concerning their treatments

Stroke survivors often articulated that in light of their multiple health conditions, and hence multiple risk factors for stroke that need to be managed, they would like to be more involved in selecting their treatments based on what is important to them and their desired outcomes. This viewpoint was further confirmed by stroke survivors attending the stroke patients and family group (SRPFG). A number of clinicians perceived that SDM did not take place on a regular basis during routine clinical consultations, and there was a need for greater involvement of stroke survivors and their carers in selecting treatments that best suit their needs and preferences. Commissioners and policy-makers agreed that SDM is a necessity and noted that policies in the UK and other countries require to involve patients in their treatment decisions. They emphasised the importance of data and evidence-based recommendations to improve decision making about treatments.

*"When I go to my doctor I realise it's my doctor who is making the decisions...but I think that patients now know often more about their own condition than the health professionals"* (stroke survivor, FG1)

*"This information (risk factors) which used to be something that I, as a doctor, only thought about, it's now something that we should think about together"* (GP, FG5)

*"How do we help patients and carers and health professionals together have a discussion using data information to make decisions about treatments?"* (commissioner, FG2)

#### 2. Present and communicate recurrent stroke risk in a meaningful way

Both stroke survivors and healthcare professionals emphasised the importance of displaying and communicating personalised risk estimation in a clear and meaningful way. Stroke survivors expressed



that current risk presentations lacked clarity, with healthcare professionals agreeing with this idea, reporting that they also find it difficult to understand and communicate risk to patients while linking it to specific actions and behaviours among patients.

*“What is this individual’s risk of a further stroke in five years... and that’s really important because patients commonly ask us that ‘what is the risk of me having another stroke in the next year’ and we come up with a figure and we say ‘5% of whatever’” (hospital stroke physician, Interview)*

*“And I think the other thing is what actually is risk, how do you convey that, I mean, is it twice as much risk if I’ve never had a stroke...I know exactly what you mean 50% and 5% of that are meaningless to most people” (stroke survivor, FG4)*

*“Because the patients often think that the GPs – or the doctors/the specialists understand risk. It’s really difficult to understand risk and we have to use guidelines to help us with risk. So if the guidelines say, ‘This is a risk and this is the level at which you should intervene’, then I’m not well enough informed to go any further than that” (GP, FG3)*

### 3. Compare stroke survivor’s perceived stroke risk with their predicted risk

In the fourth core stakeholder meeting (FG4), a carer voiced the importance of allowing stroke survivors to articulate their own perceived risk of having a recurrent stroke, which could then be compared with the actual predicted risk. The rest of the group agreed that this would facilitate a collaborative discussion on potential risk factors and their impact on stroke risk.

*“Patients themselves if they’ve been through a process will likely at some point be shown something and said either mark yourself on this, because another thing is where do you think you are on this scale at the moment with your risks, sometimes that’s quite powerful” (carer, FG4)*

### 4. Personalise treatments to help control multiple stroke risk factors

All stakeholders emphasised the importance of controlling multiple risk factors for stroke recurrence and the need to develop effective treatments based specifically on the patient’s characteristics (e.g., age, ethnicity, health conditions). Survivors from the stroke patients and family group (SRPFG) similarly voiced their preference to know their personal risk according to their personal characteristics and receive advice from professionals about what specific actions they could perform to reduce the identified risks. Commissioners were interested in care pathways for stroke patients with multimorbidity and how these care pathways could be tailored to the patient’s characteristics.

*“Patients who’ve had a confirmed stroke, the first thing as a family physician in terms of management is to make sure that you’ve controlled all their risk factors to prevent them getting another stroke” (GP, Interview)*

*“And if the system could provide him, like, tailored for the patient taking all the information and saying OK for this patient because he had stroke, he has diabetes and high blood pressure, we recommend the following care pathway, treatments” (commissioner, FG1)*

*“Anything that can be personalised or tailored, so you don’t feel it’s this off the shelf thing that you’re being given, you know... you sit with your doctor and it’s not just a case of giving out a*

1  
2  
3 *leaflet, but actually let's have a look at your personal data" (occupational therapist, FG4)*

#### 5. Display effectiveness of recommended treatments in reducing stroke risk

7 Healthcare professionals, commissioners and policy-makers considered that stroke survivors with  
8 multimorbidity often have multiple risk factors to manage, and prioritising the different treatments  
9 available for secondary prevention of these risk factors is required. Stroke survivors wanted to know  
10 the relative benefit of the proposed treatments being offered by clinicians in terms of how they  
11 addressed stroke risks and to take this information into account when deciding on treatments.  
12 Commissioners specifically emphasised the importance of using evidence-based data to prioritise  
13 treatments and help patients in their decision making.  
14  
15

16  
17 *"...and you need to know, in fact, what the risk is if you do nothing compared with the risk if*  
18 *you do something" (stroke survivor, FG3)*

19  
20 *"The question might be for a patient 'should I take a statin after a stroke' and we might be*  
21 *able to use the database to answer the question 'what would be the risk of future stroke if I do*  
22 *take a statin or if I don't take a statin' and you can use that information to help to come to a*  
23 *decision together" (commissioner, FG1)*

24  
25 *"Well I suppose you could think about the common comorbidities, so hypertension and stroke,*  
26 *AF (atrial fibrillation) and stroke, diabetes and stroke and you could think about not necessarily*  
27 *an algorithm but a sort of stepwise prioritisation about what you should think about in terms*  
28 *of the patient's total management, you know, which would be the most important area of*  
29 *focus?" (GP, Interview)*  
30  
31  
32

#### 6. Address stroke survivor concerns about treatment and barriers to adherence

33  
34 Stroke survivors in some of the focus groups and the SRPFG raised concerns about the challenges of  
35 multiple treatments they were expected to adhere to in order to decrease the risks of a recurrent  
36 stroke, reporting that they do not always understand the value of these treatments. They felt that a  
37 joint discussion with a healthcare professional about these concerns would help them better  
38 understand the value of a particular treatment and reach an informed decision about it. When  
39 interviewed, several GPs agreed that it was very challenging for stroke survivors with multimorbidity  
40 to adhere to multiple medications and other treatments at any given time, and it is sometimes difficult  
41 to differentiate their medication between what is absolutely necessary and what is not.  
42  
43  
44  
45

46 *"My experience both with the doctors at the surgery and the consulting hospital is trying to*  
47 *discuss the medication that they insisted I took. I had horrendous side-effects and I kept trying*  
48 *to say to them 'Look, I'm having these side-effects, can I change, can I reduce, can I do blah*  
49 *blah' and their attitude I have to say, is one of terrorising patients" (stroke survivor, FG1)*

50  
51  
52 *"I think that's a common problem with all patients that suffer from comorbidities. It's*  
53 *rationalising their medication and you know being able to take a holistic view of the person*  
54 *and make sensible decisions about what they absolutely need to continue on and what they*  
55 *don't. And you can only really do that just by having time with the patient, you know if it's*  
56 *important for them to be able to sort of get up and get out and about and not feel dizzy, then*  
57 *you may have to compromise on how much blood pressure medication they take" (GP,*  
58 *Interview)*  
59  
60

## 7. Support continuity of care

Stroke survivors often reported that they did not have pre-set appointments with the GP or other healthcare professionals on a regular basis. Several felt that the idea of personalised care to control stroke risk factors is very important but should have a follow-up to ensure continuity of care. The selected treatments and management plan should be saved on the system for future consultations and a follow-up appointment always set in advance. Commissioners emphasised the importance of follow-up appointments and raised the concern that although follow-up appointments are an important part of stroke management and are required according to the National Institute for Health and Care Excellence (NICE) guidelines, many stroke survivors do not have follow-up appointments and do not see a GP.

*"I'm just thinking of my practice where it's very difficult to get to see the same doctor and if I was presented with my third in line (i.e. the risk graphic display) ten times from ten different doctors I'd be starting to get a bit hacked off I think" (stroke survivor, FG4)*

*"It's not a one time thing...there needs to be continuous interaction I think if something's going to happen (stroke survivor, FG4).*

## 8. Identify stroke survivors at high risk of recurrent stroke

Healthcare professionals, commissioners and policy-makers highlighted the need to proactively identify stroke survivors at a high risk of having a recurrent stroke to assess and treat them in a timely manner. They felt that many stroke survivors, especially those with more severe consequences from the stroke, do not often see a physician, and it is important to have a smart system in place that could proactively identify them and assess their risks.

*"I think the challenge first of all who are the high-risk patients, can we identify them and, if we can, is there a way through case management or community matrons, you know, linked with the stroke teams in the community providing access to therapy and assessment when it's required in a timely fashion" (commissioner, Interview)*

### Development of DOTT decision support system

The above themes and solutions were proposed, designed and refined during the above collaborative design process with stakeholders, which informed the design of DOTT (Deciding on Treatments Together). DOTT is a computerised decision aid, integrated with the EHR system, to be used in primary care during clinical consultations between the healthcare professional and stroke survivor, aiming to facilitate shared decision making on treatments to reduce recurrent stroke risk.

Specifically, DOTT will:

- (1) Allow stroke survivors to indicate, in a graphic presentation (Figure 1), **their perceived risk of having a further stroke**. The graphic presentation in DOTT is based on population rank,<sup>30,31</sup> simulating a queue of 20 people around the same age of the stroke survivor. Stroke survivors indicate where they think they are positioned in the queue (from least to most likely). This risk would then be compared to the actual predicted risk to facilitate conversation on risk factors. Needs from theme 3 are addressed with this feature.
- (2) Display the **stroke survivor's actual predicted risk of having a further stroke** in a meaningful and

1  
2  
3 understandable way for both healthcare professionals and stroke survivors. The predicted stroke  
4 risk will be calculated based on the patient's information from the EHR and on rules generated  
5 from the linked dataset (SLSR and LDN). Needs from theme 2 are addressed with this feature (see  
6 Figure 1).  
7

- 8  
9 (3) Provide a **list of personalised recommended treatments** for the stroke survivor based on their  
10 risk factors (e.g., hypertension, atrial fibrillation) extracted from the EHR. A list of the most  
11 effective evidence-based treatments for secondary prevention would be compiled and extracted  
12 from the recent NICE guidelines<sup>32</sup> and the National Clinical Guideline for Stroke.<sup>33</sup> This includes  
13 both clinical and lifestyle recommendations. For each recommended treatment, the evidence  
14 supporting the treatment will also be displayed. Needs from section 4 are addressed with this  
15 feature.  
16  
17 (4) **Prioritise the recommended treatments** based on their relative risk reduction and present the  
18 most effective treatment first. The clinician and stroke survivor can select one or more treatments  
19 and see on the graphic display, how the treatments reduce the overall stroke risk. The benefit of  
20 each treatment in terms of stroke risk will be calculated using the integrated dataset (SLSR and  
21 LDN). Needs from theme 5 are addressed with this feature.  
22  
23 (5) **Display stroke survivors' common concerns** on the suggested treatments (e.g., "do I have to take  
24 blood pressure drugs for life?"), which will aid in identifying and addressing barriers to treatment  
25 adherence and eliciting preferences. An initial list of concerns and their response was prepared  
26 based on qualitative studies eliciting patients' barriers to treatment adherence.<sup>34,35</sup> Needs from  
27 theme 6 are addressed with this feature  
28  
29 (6) Allow stroke survivors and their carers to discuss the different treatments with the healthcare  
30 professional and **jointly select the treatments that best suit the stroke survivor's preferences,**  
31 **desired outcomes and goals** (and remove the ones that do not). Lifestyle modification will be  
32 discussed during the consultation and enhanced through referral to specialists or lifestyle  
33 intervention programs. The agreed management plan and information on the different  
34 treatments will be printed and handed to the stroke survivor to take home. Needs from theme 1  
35 are addressed with this feature.  
36  
37 (7) Set automatically a **follow-up appointment** in 3 months' time. The information entered, including  
38 the agreed management plan is saved and transferred back to the stroke survivor's EHR for future  
39 consultations. During the follow-up consultation, the management plan is reviewed and  
40 treatments to address risk factors for stroke recurrence can be added, modified or removed.  
41 Desired clinical and patient outcomes will also be reviewed. Needs from theme 7 are addressed  
42 with this feature.  
43  
44 (8) The stroke prediction model will also be used to **proactively identify individuals at high risk of a**  
45 **recurrent stroke** by calculating their recurrent stroke risk at defined periods of time (the practice  
46 can define the desired threshold) and alert the practice (e.g., physician, nurse, receptionist) to  
47 invite those patients for a clinical consultation. Needs from theme 8 are addressed with this  
48 feature.  
49  
50 (9) All information from patients and healthcare professionals (e.g., treatments selected by the  
51 patient, desired outcomes, predicted stroke risk, results in follow-up) will be **captured by the**  
52 **system as part of a LHS** and be used to improve the system's predictive model and treatment  
53 recommendations.  
54  
55  
56  
57  
58  
59  
60

1  
2  
3 Figure 1 depicts an example screenshot from DOTT decision aid prototype.  
4

5 <Insert Figure 1 here>  
6

## 7 **Usability and acceptability evaluation**

### 8 **Demographics**

9  
10  
11 Eight stroke survivors and eight GPs participated in the usability and acceptability evaluations. GPs (4  
12 men, 4 women) had average of 10.3 years of experience as a GP. All had experience in providing care  
13 to stroke survivors, had medium to high confidence in using new technology and low to medium  
14 experience using DSS. Stroke survivors (4 men, 4 women) had an average age of 65.5 years (SD: 11.4,  
15 range: 49-81). All had hypertension, two had heart problems, one was suffering from depression, four  
16 had mobility issues, and four had minor cognitive deficiencies (attention and memory).  
17  
18

### 19 **Usability and acceptability**

20  
21 Both GPs and stroke survivors found the decision aid usable and acceptable. GPs found the decision  
22 aid easy to use (score 4.3), easy to understand (4.1) and felt very confident using it (4.2). They thought  
23 that this decision aid was better than how they usually helped patients decide about treatments for  
24 controlling their risk factors (4.4), that this strategy was compatible with the way they thought things  
25 should be done (4.3), that this type of decision aid was suitable for helping patients make informed  
26 choices (4.0) and that the decision aid complemented their usual approach (4.4). Stroke survivors  
27 would like to use the decision aid frequently (4.0), thought that it was easy to use (4.2) and felt  
28 confident using it (4.1). Initial findings of the usability evaluation can be found in Porat et al.<sup>36</sup>  
29  
30  
31  
32

### 33 **Identified themes**

34  
35 Five main themes relating to the usability and acceptability of the decision aid were identified:

#### 36 **1. Logical and structured process that facilitates discussion**

37  
38 All GPs and stroke survivors (n=16) found the decision aid to be clear, and consisting of a logical flow  
39 that helped to structure the consultation. They felt that the decision aid facilitated a transparent  
40 discussion on the different proposed treatments and elicited patients' preferences.  
41  
42

43 *"Physician pointing out what to do but the patient makes the decision since it's hard to get*  
44 *your head around everything. More doable if you have specific areas to work on with specific*  
45 *targets that suits you" (stroke survivor 2)*  
46

#### 47 **2. Powerful risk display showing the benefit of each treatment**

48  
49 GPs and stroke survivors (n=15) found the visual display showing the risk before and after a selected  
50 intervention, easy to understand and powerful. Both stroke survivors and GPs commented that they  
51 were not aware of the effect the treatments have on reducing the stroke risk.  
52  
53

54 *"The most powerful thing is the visual shifting of risk" (GP 5)*

55  
56 *"Wow, a small change can make a big difference, this is very encouraging" (stroke survivor 6)*  
57  
58  
59  
60

### 3. *The patient takes home printed information*

GPs and stroke survivors (n=10) thought that it was very important that the patient has the management plan and all the information printed so they can review it at home. Particularly stroke survivors wanted to have their current predicted risk and information on their selected treatments, including the date of the follow up appointment printed out, so it could motivate them to adhere to the treatments.

*“The important thing is that the patient goes out with a piece of paper that summarises in bullet points the outcome of the consultation. If its black and white on paper it makes a difference” (stroke survivor 3)*

### 4. *Importance of a learning system*

GPs (n=3) raised the importance of a learning system providing up-to-date information. They wanted to make sure that the suggested treatments are in line with the most up-to-date evidence.

*“The learning aspect is very important, since this system is based on evidence and evidence can change” (GP 6)*

### 5. *Can motivate patients to change behaviour*

All GPs and stroke survivors (n=16) believed that the decision aid could motivate patients to change behavior. Stroke survivors liked the idea of being involved in deciding on their treatments according to their preferences and abilities, receiving information on their stroke risk factors, and discussing their views and concerns with the clinician. They felt it gave them more control over their health and motivation to adhere to the treatments they selected. GPs felt it was a good way to discuss the different treatments and give patients the power to decide on treatments that suit them.

*“I believe discussing the different options with the patients, shared decision making, is likely to improve adherence” (GP 1).*

## Concerns

GPs and stroke survivors raised two main concerns from using the decision aid.

### 1. *Deals with one aspect of the consultation*

GPs and stroke survivors (n=6) felt that the decision aid is good but focuses on one aspect of the consultation (reducing risk of recurrent stroke) and patients may have other concerns, such as depression or social isolation.

*“This is good, but for me the most important thing is the emotional aspect, and this tool doesn’t relate to that” (stroke survivor 4)*

### 2. *Time*

The main concern for GPs was time (n=6), in which within the allotted 10 minutes for the consultation already provided significant limits, and most felt they will not manage to fit it in.

## Suggestions for improvement

GPs and stroke survivors provided suggestions for improving the decision aid:



- 1
- 2
- 3
- 4 1. The terminology was too clinical, for example “treatments” and “management”, could be
- 5 changed to “possible strategies or approaches”.
- 6
- 7 2. In addition to the management plan, information (a leaflet) on each of the selected
- 8 treatments should also be printed.
- 9
- 10 3. Add clinical data, for example when clicking on “cholesterol” show the patient’s last three
- 11 values, and do this also for their blood pressure.
- 12
- 13 4. Enable more than one display of risk, each one prefers a different display and understands
- 14 risk differently.
- 15
- 16 5. Add emotional and mental health aspects (e.g., depression)

16 We have made the above changes and additions to the updated version of DOTT.

## 17

## 18

## 19

## 20

## 21

## 22

## 23

## 24

## 25

## 26

## 27

## 28

## 29

## 30

## 31

## 32

## 33

## 34

## 35

## 36

## 37

## 38

## 39

## 40

## 41

## 42

## 43

## 44

## 45

## 46

## 47

## 48

## 49

## 50

## 51

## 52

## 53

## 54

## 55

## 56

## 57

## 58

## 59

## 60

### DISCUSSION

Our work focused on engaging various stakeholders in the identification, design, prototyping and evaluation of a decision aid to improve secondary prevention after stroke. Eight themes informed the design of DOTT. A number of the themes and solutions proposed by the stakeholders have been implemented previously to some extent to support other patient groups, such as diabetes and atrial fibrillation, and are recommended in SDM tools. These include, predicting a patient’s risk based on their risk factors, proposing possible treatments and displaying their benefit in decreasing the risk,<sup>37</sup> and incorporating patients’ concerns within the decision making process.<sup>38</sup>

Additional unique themes and solutions have emerged as outcomes of the collaborative design process in this study, which could be used for a range of chronic diseases requiring long-term management. Specifically:

(1) **Present and communicate risk in a meaningful way.** While there are many different ways to communicate multiple risks to patients, the most commonly used are absolute or relative risks presented as percentages or probabilities (e.g., “from 100 people like you 20 are expected to have a recurrent stroke”).<sup>39</sup> However, studies have shown that in general, healthcare professionals are as unfamiliar as their patients with risk estimates and probabilities<sup>40</sup> and often healthcare professionals have reported finding it difficult to combine multiple risk factors into an accurate assessment of vascular risk<sup>41</sup> and to communicate this risk to patients.<sup>42</sup> Moreover, patients may feel that statistical risk estimates do not apply to them personally.<sup>43</sup> To overcome this, our graphic presentation is based on population rank, simulating the patient in a queue of people around their age.<sup>30,31</sup> Studies have also shown that formats which present data framed as the risk of an individual were perceived as more relevant and easier to relate to than percentage risk estimates.<sup>44</sup>

(2) **Prioritising treatments.** Healthcare professionals have previously expressed concerns about managing care and making decisions about treatments, including communicating risks and benefits for patients with multimorbidity and complex needs.<sup>45</sup> They often have to make decisions with such patients that involve a process of prioritisation or trade-offs, facilitating a discussion with the patient on what is important to the patient and what they would like to achieve in terms of their health (i.e. goal setting).<sup>46</sup> Aligning patient goals and desired outcomes with clinicians’ goals is likely to improve outcomes for these patients.<sup>46</sup>

(3) **Identify individuals at high risk.** Calculating periodically (in an automatic way) the stroke risk of survivors to identify individuals at high risk of recurrent stroke (based on their information in the EHR)

1  
2  
3 could be a valuable feature for improving long-term management and care for stroke survivors who  
4 are less likely or able to visit healthcare professionals on a regular basis.  
5

6 These solutions, which are delivered through a DSS integrated with the EHR system and based on data  
7 from a linked population dataset, have the potential to be an instrument of change in clinical practice.  
8 This will be done by providing scientific evidence at the point of clinical care (e.g., personalised  
9 treatments and their benefit based on the individual's risk factors), while simultaneously collecting  
10 information from that care (e.g., treatments selected by the patient, desired outcomes, predicted  
11 stroke risk) to promote innovation in optimal healthcare delivery.<sup>14</sup>  
12  
13

### 14 **Strengths and limitations**

15  
16 Although the core focus of the DSS (prevention of a future stroke) was identified by patients as a  
17 priority, having a single focus might hinder discussions of other important problems (e.g., depression,  
18 social isolation). Such issues may even have a larger perceived impact on long-term outcomes after  
19 stroke, for example, improving mental health or access to social care services, which were also  
20 brought up by stakeholders as a priority to address long-term care for stroke survivors with  
21 multimorbidity,<sup>12</sup> and were raised as a concern in the usability and acceptability evaluations.  
22 Depression is indeed a risk factor of stroke,<sup>47</sup> and was added to the updated version of the decision  
23 aid.  
24  
25  
26

27 In a study assessing stroke survivors' self-reported needs,<sup>48</sup> more than 50% of long term stroke  
28 survivors reported an unmet need for stroke information (cause, prevention of recurrence). The  
29 proposed decision aid offers a meaningful starting point for addressing this common unmet need.  
30 Evidence suggests that the provision of lifestyle advice from healthcare professionals' is effective in  
31 changing health behaviours<sup>49</sup> and healthcare professionals' communication is positively correlated  
32 with patient adherence to treatments.<sup>50</sup> However, a conversation-based DSS also relies on the  
33 attitudes and communication skills of the healthcare professionals, which have been found to vary.<sup>51</sup>  
34 Interactive SDM skill training has improved SDM skills and promoted positive attitudes.<sup>52</sup> Training  
35 healthcare professionals in communication skills for SDM has also been shown to result in substantial  
36 and significant improvement in patient adherence to treatments.<sup>50</sup> Hence, interactive SDM skills  
37 training workshops will have to complement the use of the DSS. Patients are also likely to need support  
38 and preparation with taking part in SDM during the consultation.<sup>52</sup>  
39  
40  
41  
42  
43

44 The design of DOTT meets the International Patient Decision Aid Standards (IPDAS) collaboration  
45 criteria for quality decision aids.<sup>18</sup> Specifically, DOTT was designed to incorporate principles of SDM,  
46 by presenting stroke survivors with information about their treatment options and likely outcomes,  
47 presenting the risks and benefits of each option, and engaging the healthcare professional and stroke  
48 survivor in a joint conversation about the patient's preferences.<sup>25</sup> Furthermore, DOTT evolves from a  
49 systematic development process, uses non-technical language and presents information in a balanced  
50 manner that allows for comparisons across alternatives.<sup>18</sup> In the future, data from wearable sensors  
51 (e.g., Fitbit, Apple Watch) will be integrated to the EHR, and DOTT could use this information to  
52 improve its risk prediction model and treatment recommendations.  
53  
54  
55

56 In the usability and acceptability evaluation, stroke survivors and GPs found DOTT to be both useful  
57 and usable. GPs perceived that the decision aid helped with structuring the consultation and eliciting  
58 patients' preferences for treatments. Stroke survivors felt it provides a good way to understand the  
59  
60



1  
2  
3 different treatment options and select the ones that best suits their preferences. GPs' main concern  
4 was that the decision aid would increase consultation times. Indeed, time constraints were identified  
5 as the main barrier for the adoption of innovations by family physicians.<sup>53,54</sup> A possible solution could  
6 be to use the decision aid as part of a clinical review after stroke, which is usually longer (e.g., 3 month,  
7 6 month and annual review) and by dedicated healthcare professionals which are less limited in time  
8 such as stroke nurses and pharmacists working in GPs' practices that are trained to consult patients  
9 with chronic and long-term health conditions.  
10  
11

## 12 13 **CONCLUSION**

14  
15 Engaging various stakeholders throughout the design and evaluation process ensures that the  
16 intervention (features and functions) is in line with the needs reported by the different stakeholders  
17 (i.e., stroke survivors, healthcare professionals, policy-makers). DOTT has demonstrated the potential  
18 to reduce stroke recurrence by adopting a data-driven user-centred approach. DOTT urges clinicians  
19 to shift away from the advice-giving approach typically used in medical consultations to one which  
20 actively engages the patient in decision making and respects patient choice and autonomy. This will  
21 lead to stroke survivors taking ownership for the treatment decisions, improving their adherence to  
22 the agreed management plan and thus reducing their stroke risk. A forthcoming feasibility study and  
23 subsequent clinical trial will evaluate the effectiveness of DOTT in improving decision making quality,  
24 and whether it affects risk factor levels and risk of recurrence. While DOTT currently targets stroke  
25 risk factors only, the design approach could be used for a range of chronic diseases requiring long-  
26 term management, paving the way to a set of standards for delivering LHS interventions in clinical  
27 practice.  
28  
29  
30  
31  
32  
33

34  
35 **Acknowledgments:** The research team are very grateful to all the stakeholders that participated in  
36 the study including stroke survivors, carers, healthcare professionals, policy makers and  
37 commissioners. We would like to thank specifically the King's College London Stroke Research Patients  
38 and Family Group for their valuable comments that helped improve the design of the decision aid.  
39

40  
41 **Author Contributions:** Design of study: all authors. Data collection: TP, ES, IM. Thematic Analysis  
42 and interpretation of data: TP, ES, IM, MAV, VC. Initial draft of manuscript: TP. Review and editing of  
43 multiple versions and sign off final version of manuscript: all authors.  
44

45  
46 **Funding:** This work was supported by the National Institute for Health Research (NIHR) Collaboration  
47 for Leadership in Applied Health Research and Care (CLAHRC) South London at King's College Hospital  
48 NHS Foundation Trust, and the NIHR Biomedical Research Centre, Guy's and St Thomas' NHS  
49 Foundation Trust and King's College London, UK (award number NIHR CLAHRC-2013-10022). The  
50 views expressed are those of the authors and not necessarily those of the NHS, the NIHR or the  
51 Department of Health.  
52  
53

54  
55 **Competing interests:** None declared.

56  
57 **Patient consent:** Not required.  
58  
59  
60

**Ethics approval:** Approval for this study was granted by the National Research Ethics Service (NRES) Committee North East-Tyne and Wear South (REC reference number: 14/NE/1149) and by the East of England – Cambridgeshire and Hertfordshire Research Ethics Committee (REC reference number: 17/EE/0161).

**Data sharing statement:** There are no additional data available from this study.

**Checklist for reporting guidelines:** the authors used SRQR guidelines for reporting qualitative research.

## REFERENCES

1. Katan M, Luft A. Global burden of stroke. In *Seminars in neurology* 2018 Apr; 38(2):208-211. Thieme Medical Publishers.
2. King's College London. The burden of stroke in Europe, the challenge for policy makers for the Stroke Alliance for Europe (SAFE); 2015.
3. Mohan KM, Wolfe CD, Rudd AG, Heuschmann PU, Kolominsky-Rabas PL, Grieve AP. Risk and cumulative risk of stroke recurrence: a systematic review and meta-analysis. *Stroke* 2011;42:1489–94.
4. Stroke Association UK, State of the Nation, stroke statistics, February 2018. [https://www.stroke.org.uk/system/files/sotn\\_2018.pdf](https://www.stroke.org.uk/system/files/sotn_2018.pdf)
5. Kernan WN, Ovbiagele B, Black HR, Bravata DM, Chimowitz MI, Ezekowitz MD, Fang MC, Fisher M, Furie KL, Heck DV, Johnston SC. Guidelines for the prevention of stroke in patients with stroke and transient ischemic attack: a guideline for healthcare professionals from the American Heart Association/American Stroke Association. *Stroke*. 2014 Jul;45(7):2160-236.
6. Chen R, McKeivitt C, Crichton SL, Rudd AG, Wolfe CD. Socioeconomic deprivation and provision of acute and long-term care after stroke: the South London Stroke Register cohort study. *J Neurol Neurosurg Psychiatry*. 2014 Dec 1;85(12):1294-300.
7. Marshall IJ, Wang Y, McKeivitt C, Rudd AG, Wolfe CD. Trends in risk factor prevalence and management before first stroke: data from the South London Stroke Register 1995–2011. *Stroke*. 2013 Jul;44(7):1809-16.
8. Bridgwood B, Lager KE, Mistri AK, Khunti K, Wilson AD, Modi P. Interventions for improving modifiable risk factor control in the secondary prevention of stroke. *Cochrane Database of Systematic Reviews*. 2018(5).
9. Dregan A, van Staa TP, McDermott L, McCann G, Ashworth M, Charlton J, Wolfe CD, Rudd A, Yardley L, Gulliford MC, Meredith S. Point-of-care cluster randomized trial in stroke secondary prevention using electronic health records. *Stroke*. 2014 Jul;45(7):2066-71.
10. Kawamoto K, Houlihan CA, Balas A, Lobach DF. Improving clinical practice using clinical decision support systems: A systematic review of trials to identify features critical to success. *British Medical Journal* 2005;330:765–768.
11. Shibl R, Lawley M, Debusse J. Factors influencing decision support system acceptance. *Decision Support Systems* 2013;54:953–961
12. Sadler E, Porat T, Marshall I, Hoang U, Curcin V, Wolfe CD, McKeivitt C. Shaping innovations in long-term care for stroke survivors with multimorbidity through stakeholder engagement. *PloS one* 2017;12(5):e0177102.

13. Friedman C, Rubin J, Brown J, Buntin M, Corn M, Etheredge L, Gunter C, Musen M, Platt R, Stead W, Sullivan K. Toward a science of learning systems: a research agenda for the high-functioning Learning Health System. *Journal of the American Medical Informatics Association*. 2014 Oct 23;22(1):43-50.
14. Maddox TM, Albert NM, Borden WB, Curtis LH, Ferguson TB, Kao DP, ... Shah ND. The Learning Healthcare System and Cardiovascular Care: A Scientific Statement From the American Heart Association. *Circulation* 2017;135(14):e826-e857.
15. Califf RM, Robb MA, Bindman AB, Briggs JP, Collins FS, Conway PH, ... Dymek C. Transforming evidence generation to support health and health care decisions. *N Engl J Med* 2016; 375:2395-2400.
16. Berg M. Patient Care Information Systems and Health Care Work: A Sociotechnical Approach. *International Journal of Medical Informatics* 1999;55(2):87-101.
17. Chewing B, Bylund CL, Shah B, Arora NK, Gueguen JA, Makoul G. Patient preferences for shared decisions: a systematic review. *Patient education and counseling*. 2012 Jan 1;86(1):9-18.
18. Elwyn G, O'Connor A, Stacey D, Volk R, Edwards A, Coulter A, Thomson R, Barratt A, Barry M, Bernstein S, Butow P. Developing a quality criteria framework for patient decision aids: online international Delphi consensus process. *Bmj*. 2006 Aug 24;333(7565):417.
19. Barry MJ, Edgman-Levitan S. Shared decision making—the pinnacle of patient-centered care. *New England Journal of Medicine* 2012;366(9):780-781.
20. Stiggelbout AM, Van der Weijden T, De Wit MP, Frosch D, Légaré F, Montori VM, Trevena L, Elwyn G. Shared decision making: really putting patients at the centre of healthcare. *Bmj*. 2012 Jan 27;344:e256.
21. Heisler M, Bouknight RR, Hayward RA, Smith DM, Kerr EA. The relative importance of physician communication, participatory decision making, and patient understanding in diabetes self-management. *Journal of General Internal Medicine* 2002;17(4):243-252.
22. Wilson SR, Strub P, Buist AS, Knowles SB, Lavori PW, Lapidus J, Vollmer WM. Shared treatment decision making improves adherence and outcomes in poorly controlled asthma. *American journal of respiratory and critical care medicine*. 2010 Mar 15;181(6):566-77.
23. Stewart JA, Dundas R, Howard RS, Rudd AG, Wolfe CDA. Ethnic differences in incidence of stroke: prospective study with stroke register. *BMJ*, 1999;318(7189):967-971.
24. Schofield P, Baawuah F, Seed PT, Ashworth M. Managing hypertension in general practice: a cross-sectional study of treatment and ethnicity. *Br J Gen Pract*. 2012 Oct 1;62(603):e703-9.
25. Elwyn G, Frosch D, Thomson R, Joseph-Williams N, Lloyd A, Kinnersley P, Cording E, Tomson D, Dodd C, Rollnick S, Edwards A. Shared decision making: a model for clinical practice. *Journal of general internal medicine*. 2012 Oct 1;27(10):1361-7.
26. King's College London's Stroke Research Patient and Family Group (SRPFG). [www.kcl.ac.uk/lsm/research/divisions/hscr/research/groups/stroke/forpatientsandfamily/patientsandfamily.aspx](http://www.kcl.ac.uk/lsm/research/divisions/hscr/research/groups/stroke/forpatientsandfamily/patientsandfamily.aspx)
27. O'Connor AM, Cranney A. User Manual-Acceptability. Ottawa Hospital Research Institute, 2002.
28. Brooke J. SUS-A quick and dirty usability scale. *Usability evaluation in industry*, 1996;189:4-7.
29. Braun V, Clarke V. Using thematic analysis in psychology. *Qualitative Research in Psychology*; 2006;3:77-101.
30. Tunstall-Pedoe H. The Dundee coronary risk-disk for management of change in risk factors. *BMJ* 1991;303:744-747.

- 1
  - 2
  - 3
  - 4
  - 5
  - 6
  - 7
  - 8
  - 9
  - 10
  - 11
  - 12
  - 13
  - 14
  - 15
  - 16
  - 17
  - 18
  - 19
  - 20
  - 21
  - 22
  - 23
  - 24
  - 25
  - 26
  - 27
  - 28
  - 29
  - 30
  - 31
  - 32
  - 33
  - 34
  - 35
  - 36
  - 37
  - 38
  - 39
  - 40
  - 41
  - 42
  - 43
  - 44
  - 45
  - 46
  - 47
  - 48
  - 49
  - 50
  - 51
  - 52
  - 53
  - 54
  - 55
  - 56
  - 57
  - 58
  - 59
  - 60
31. Marshall IJ, Wolfe CD, McKeivitt C. 'People like you?': how people with hypertension make sense of future cardiovascular risk—a qualitative study. *BMJ open*. 2018 Nov 1;8(11):e023726.
32. NICE Guidelines Stroke in adults, 2016 <https://www.nice.org.uk/guidance/qs2>
33. Intercollegiate Stroke Working Party (ISWP). National Clinical Guideline for Stroke, 5th edn. 2016. London: Royal College of Physicians. [https://www.strokeaudit.org/SupportFiles/Documents/Guidelines/2016-National-Clinical-Guideline-for-Stroke-5t-\(1\).aspx](https://www.strokeaudit.org/SupportFiles/Documents/Guidelines/2016-National-Clinical-Guideline-for-Stroke-5t-(1).aspx)
34. Marshall IJ, Wolfe CD, McKeivitt C. Lay perspectives on hypertension and drug adherence: systematic review of qualitative research. *BMJ*, 2012;345:e3953.
35. Pound P, Britten N, Morgan M, Yardley L, Pope C, Daker-White G, Campbell R. Resisting medicines: a synthesis of qualitative studies of medicine taking. *Social science & medicine*. 2005 Jul 1;61(1):133-55.
36. Porat T, Liao Z, Curcin V. Engaging Stakeholders in the Design and Usability Evaluation of a Decision Aid to Improve Secondary Stroke Prevention. *Studies in health technology and informatics*. 2018;247:765-9.
37. Nolan T, Dack C, Pal K, Ross J, Stevenson FA, Peacock R, Pearson M, Spiegelhalter D, Sweeting M, Murray E. Patient reactions to a web-based cardiovascular risk calculator in type 2 diabetes: a qualitative study in primary care. *Br J Gen Pract*. 2015 Mar 1;65(632):e152-60.
38. Kaiser K, Cheng WY, Jensen S, Clayman ML, Thappa A, Schwiep F, Chawla A, Goldberger JJ, Col N, Schein J. Development of a shared decision-making tool to assist patients and clinicians with decisions on oral anticoagulant treatment for atrial fibrillation. *Current medical research and opinion*. 2015 Dec 2;31(12):2261-72.
39. Ahmed H, Naik G, Willoughby H, Edwards AG. Communicating risk. *BMJ*, 32012;44:e3996.
40. Perneger TV, Agoritsas T. Doctors and patients' susceptibility to framing bias: a randomized trial. *Journal of General Internal Medicine*, 2011;26(12):1411-1417.
41. Kenning C, Fisher L, Bee P, Bower P, Coventry P. Primary care practitioner and patient understanding of the concepts of multimorbidity and self-management: A qualitative study. Sage Open Medicine 2013.
42. Redfern J, Rudd AD, Wolfe CD, McKeivitt C. Stop stroke: development of an innovative intervention to improve risk factor management after stroke. *Patient education and counseling*. 2008 Aug 1;72(2):201-9.
43. Emmons KM, Koch-Weser S, Atwood K, Conboy L, Rudd R, Colditz G. A qualitative evaluation of the Harvard Cancer Risk Index. *Journal of health communication*. 1999 Sep 1;4(3):181-93.
44. Soureti A, Hurling R, Murray P, van Mechelen W, Cobain M. Evaluation of a cardiovascular disease risk assessment tool for the promotion of healthier lifestyles. *European Journal of Cardiovascular Prevention & Rehabilitation*, 2010;17(5):519-523.
45. Tsisis P, Bains J. Management of complex chronic disease: facing the challenges in the Canadian health-care system. *Health Serv Manage Res* 2008;21:228–35.
46. Kuluski K, Gill A, Naganathan G, Upshur R, Jaakkimainen RL, Wodchis WP. A qualitative descriptive study on the alignment of care goals between older persons with multi-morbidities, their family physicians and informal caregivers. *BMC Family Practice*. 2013 Dec;14(1):133.
47. Jonas BS, Mussolino ME. Symptoms of depression as a prospective risk factor for stroke. *Psychosomatic medicine* 2000;62:463-471.

- 1  
2  
3 48. McKeivitt C, Fudge N, Redfern J, Sheldenkar A, Crichton S, Rudd AR, Forster A, Young J, Nazareth I,  
4 Silver LE, Rothwell PM. Self-reported long-term needs after stroke. *Stroke*. 2011 May;42(5):1398-  
5 403.  
6  
7 49. Kenkel D, Terza JV. The effect of physician advice on alcohol consumption: count regression with  
8 an endogenous treatment effect. *J. App. Econom*. 2001;16:165–184.  
9  
10 50. Zolnierok KBH, DiMatteo MR. Physician communication and patient adherence to treatment: a  
11 meta-analysis. *Medical Care*, 2009;47(8):826.  
12  
13 51. Breslin M, Mullan RJ, Montori VM. The design of a decision aid about diabetes medications for  
14 use during the consultation with patients with type 2 diabetes. *Patient Education and Counseling*,  
15 2008;73(3):465-472.  
16  
17 52. Joseph-Williams N, Lloyd A, Edwards A, Stobbart L, Tomson D, Macphail S, Dodd C, Brain K, Elwyn  
18 G, Thomson R. Implementing shared decision making in the NHS: lessons from the MAGIC  
19 programme. *Bmj*. 2017 Apr 18;357:j1744.  
20  
21 53. Stokes K, Barker R, Pigott R. Which doctors take up promising ideas? New insights from open data.  
22 *Nesta*. 2014.  
23  
24 54. Porat T, Delaney B, Kostopoulou O. The impact of a diagnostic decision support system on the  
25 consultation: perceptions of GPs and patients. *BMC Medical Informatics and Decision Making*,  
26 2017;17(1):79.  
27  
28

## 29 Figure captions

30 **Figure 1: An example screen from DOTT prototype displaying the stroke survivor's predicted stroke risk**  
31 **before and after a selected treatment (e.g., control blood pressure).**  
32  
33  
34  
35  
36  
37  
38  
39  
40  
41  
42  
43  
44  
45  
46  
47  
48  
49  
50  
51  
52  
53  
54  
55  
56  
57  
58  
59  
60

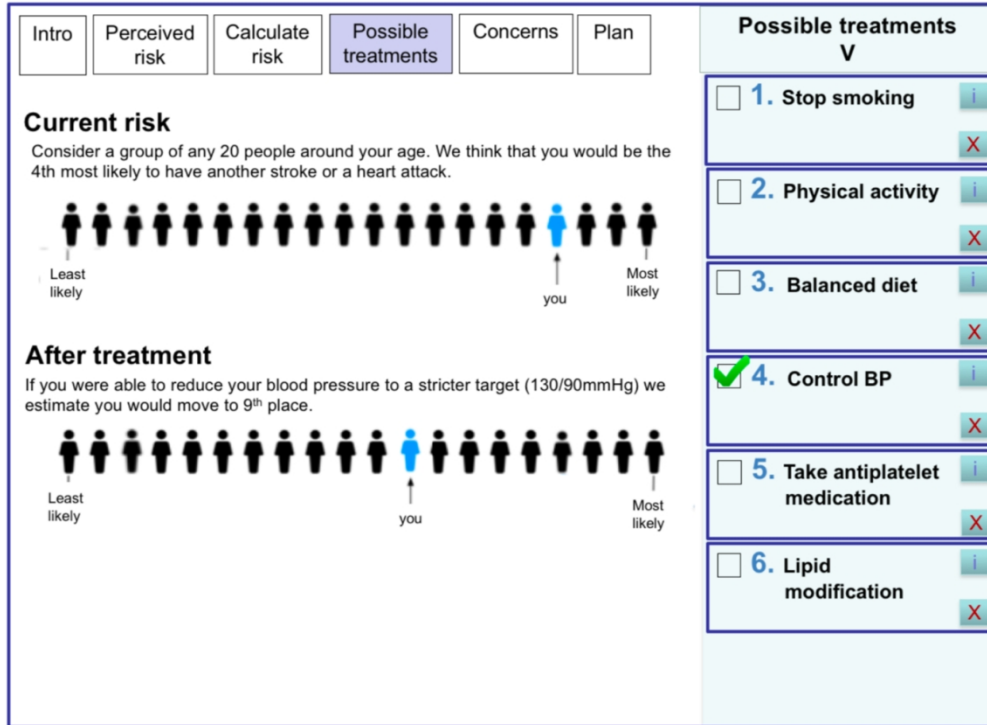

Figure 1: An example screen from DOTT prototype displaying the stroke survivor’s predicted stroke risk before and after a selected treatment (e.g., control blood pressure).

# Reporting checklist for qualitative study.

Based on the SRQR guidelines.

## Instructions to authors

Complete this checklist by entering the page numbers from your manuscript where readers will find each of the items listed below.

Your article may not currently address all the items on the checklist. Please modify your text to include the missing information. If you are certain that an item does not apply, please write "n/a" and provide a short explanation.

Upload your completed checklist as an extra file when you submit to a journal.

In your methods section, say that you used the SRQR reporting guidelines, and cite them as:

O'Brien BC, Harris IB, Beckman TJ, Reed DA, Cook DA. Standards for reporting qualitative research: a synthesis of recommendations. *Acad Med.* 2014;89(9):1245-1251.

|                                            | Reporting Item                                                                                                                                                                                                                                 | Page Number |
|--------------------------------------------|------------------------------------------------------------------------------------------------------------------------------------------------------------------------------------------------------------------------------------------------|-------------|
|                                            | #1 Concise description of the nature and topic of the study identifying the study as qualitative or indicating the approach (e.g. ethnography, grounded theory) or data collection methods (e.g. interview, focus group) is recommended        | 1           |
|                                            | #2 Summary of the key elements of the study using the abstract format of the intended publication; typically includes background, purpose, methods, results and conclusions                                                                    | 2           |
| Problem formulation                        | #3 Description and significance of the problem / phenomenon studied: review of relevant theory and empirical work; problem statement                                                                                                           | 3           |
| Purpose or research question               | #4 Purpose of the study and specific objectives or questions                                                                                                                                                                                   | 4           |
| Qualitative approach and research paradigm | #5 Qualitative approach (e.g. ethnography, grounded theory, case study, phenomenology, narrative research) and guiding theory if appropriate; identifying the research paradigm (e.g. postpositivist, constructivist / interpretivist) is also | 4,5         |



recommended; rationale. The rationale should briefly discuss the justification for choosing that theory, approach, method or technique rather than other options available; the assumptions and limitations implicit in those choices and how those choices influence study conclusions and transferability. As appropriate the rationale for several items might be discussed together.

|    |                                              |     |                                                                                                                                                                                                                                                                                                                                                      |
|----|----------------------------------------------|-----|------------------------------------------------------------------------------------------------------------------------------------------------------------------------------------------------------------------------------------------------------------------------------------------------------------------------------------------------------|
| 1  |                                              |     |                                                                                                                                                                                                                                                                                                                                                      |
| 2  |                                              |     |                                                                                                                                                                                                                                                                                                                                                      |
| 3  |                                              |     |                                                                                                                                                                                                                                                                                                                                                      |
| 4  |                                              |     |                                                                                                                                                                                                                                                                                                                                                      |
| 5  |                                              |     |                                                                                                                                                                                                                                                                                                                                                      |
| 6  |                                              |     |                                                                                                                                                                                                                                                                                                                                                      |
| 7  |                                              |     |                                                                                                                                                                                                                                                                                                                                                      |
| 8  |                                              |     |                                                                                                                                                                                                                                                                                                                                                      |
| 9  |                                              |     |                                                                                                                                                                                                                                                                                                                                                      |
| 10 | Researcher characteristics and reflexivity   | #6  | Researchers' characteristics that may influence the research, including personal attributes, qualifications / experience, relationship with participants, assumptions and / or presuppositions; potential or actual interaction between researchers' characteristics and the research questions, approach, methods, results and / or transferability |
| 11 |                                              |     |                                                                                                                                                                                                                                                                                                                                                      |
| 12 |                                              |     |                                                                                                                                                                                                                                                                                                                                                      |
| 13 |                                              |     |                                                                                                                                                                                                                                                                                                                                                      |
| 14 |                                              |     |                                                                                                                                                                                                                                                                                                                                                      |
| 15 |                                              |     |                                                                                                                                                                                                                                                                                                                                                      |
| 16 |                                              |     |                                                                                                                                                                                                                                                                                                                                                      |
| 17 |                                              |     |                                                                                                                                                                                                                                                                                                                                                      |
| 18 |                                              |     |                                                                                                                                                                                                                                                                                                                                                      |
| 19 |                                              |     |                                                                                                                                                                                                                                                                                                                                                      |
| 20 | Context                                      | #7  | Setting / site and salient contextual factors; rationale                                                                                                                                                                                                                                                                                             |
| 21 |                                              |     |                                                                                                                                                                                                                                                                                                                                                      |
| 22 | Sampling strategy                            | #8  | How and why research participants, documents, or events were selected; criteria for deciding when no further sampling was necessary (e.g. sampling saturation); rationale                                                                                                                                                                            |
| 23 |                                              |     |                                                                                                                                                                                                                                                                                                                                                      |
| 24 |                                              |     |                                                                                                                                                                                                                                                                                                                                                      |
| 25 |                                              |     |                                                                                                                                                                                                                                                                                                                                                      |
| 26 |                                              |     |                                                                                                                                                                                                                                                                                                                                                      |
| 27 | Ethical issues pertaining to human subjects  | #9  | Documentation of approval by an appropriate ethics review board and participant consent, or explanation for lack thereof; other confidentiality and data security issues                                                                                                                                                                             |
| 28 |                                              |     |                                                                                                                                                                                                                                                                                                                                                      |
| 29 |                                              |     |                                                                                                                                                                                                                                                                                                                                                      |
| 30 |                                              |     |                                                                                                                                                                                                                                                                                                                                                      |
| 31 |                                              |     |                                                                                                                                                                                                                                                                                                                                                      |
| 32 |                                              |     |                                                                                                                                                                                                                                                                                                                                                      |
| 33 | Data collection methods                      | #10 | Types of data collected; details of data collection procedures including (as appropriate) start and stop dates of data collection and analysis, iterative process, triangulation of sources / methods, and modification of procedures in response to evolving study findings; rationale                                                              |
| 34 |                                              |     |                                                                                                                                                                                                                                                                                                                                                      |
| 35 |                                              |     |                                                                                                                                                                                                                                                                                                                                                      |
| 36 |                                              |     |                                                                                                                                                                                                                                                                                                                                                      |
| 37 |                                              |     |                                                                                                                                                                                                                                                                                                                                                      |
| 38 |                                              |     |                                                                                                                                                                                                                                                                                                                                                      |
| 39 |                                              |     |                                                                                                                                                                                                                                                                                                                                                      |
| 40 |                                              |     |                                                                                                                                                                                                                                                                                                                                                      |
| 41 | Data collection instruments and technologies | #11 | Description of instruments (e.g. interview guides, questionnaires) and devices (e.g. audio recorders) used for data collection; if / how the instruments(s) changed over the course of the study                                                                                                                                                     |
| 42 |                                              |     |                                                                                                                                                                                                                                                                                                                                                      |
| 43 |                                              |     |                                                                                                                                                                                                                                                                                                                                                      |
| 44 |                                              |     |                                                                                                                                                                                                                                                                                                                                                      |
| 45 |                                              |     |                                                                                                                                                                                                                                                                                                                                                      |
| 46 |                                              |     |                                                                                                                                                                                                                                                                                                                                                      |
| 47 |                                              |     |                                                                                                                                                                                                                                                                                                                                                      |
| 48 | Units of study                               | #12 | Number and relevant characteristics of participants, documents, or events included in the study; level of participation (could be reported in results)                                                                                                                                                                                               |
| 49 |                                              |     |                                                                                                                                                                                                                                                                                                                                                      |
| 50 |                                              |     |                                                                                                                                                                                                                                                                                                                                                      |
| 51 |                                              |     |                                                                                                                                                                                                                                                                                                                                                      |
| 52 |                                              |     |                                                                                                                                                                                                                                                                                                                                                      |
| 53 | Data processing                              | #13 | Methods for processing data prior to and during analysis, including transcription, data entry, data management and security, verification of data integrity, data coding, and anonymisation / deidentification of excerpts                                                                                                                           |
| 54 |                                              |     |                                                                                                                                                                                                                                                                                                                                                      |
| 55 |                                              |     |                                                                                                                                                                                                                                                                                                                                                      |
| 56 |                                              |     |                                                                                                                                                                                                                                                                                                                                                      |
| 57 |                                              |     |                                                                                                                                                                                                                                                                                                                                                      |
| 58 |                                              |     |                                                                                                                                                                                                                                                                                                                                                      |
| 59 |                                              |     |                                                                                                                                                                                                                                                                                                                                                      |
| 60 |                                              |     |                                                                                                                                                                                                                                                                                                                                                      |



|    |                                                                                              |     |                                                                                                                                                                                                                                                                                                          |           |
|----|----------------------------------------------------------------------------------------------|-----|----------------------------------------------------------------------------------------------------------------------------------------------------------------------------------------------------------------------------------------------------------------------------------------------------------|-----------|
| 1  | Data analysis                                                                                | #14 | Process by which inferences, themes, etc. were identified and developed, including the researchers involved in data analysis; usually references a specific paradigm or approach; rationale                                                                                                              | 6         |
| 2  |                                                                                              |     |                                                                                                                                                                                                                                                                                                          |           |
| 3  |                                                                                              |     |                                                                                                                                                                                                                                                                                                          |           |
| 4  |                                                                                              |     |                                                                                                                                                                                                                                                                                                          |           |
| 5  |                                                                                              |     |                                                                                                                                                                                                                                                                                                          |           |
| 6  | Techniques to enhance trustworthiness                                                        | #15 | Techniques to enhance trustworthiness and credibility of data analysis (e.g. member checking, audit trail, triangulation); rationale                                                                                                                                                                     | 6         |
| 7  |                                                                                              |     |                                                                                                                                                                                                                                                                                                          |           |
| 8  |                                                                                              |     |                                                                                                                                                                                                                                                                                                          |           |
| 9  |                                                                                              |     |                                                                                                                                                                                                                                                                                                          |           |
| 10 |                                                                                              |     |                                                                                                                                                                                                                                                                                                          |           |
| 11 | Syntheses and interpretation                                                                 | #16 | Main findings (e.g. interpretations, inferences, and themes); might include development of a theory or model, or integration with prior research or theory                                                                                                                                               | 6-9,11-13 |
| 12 |                                                                                              |     |                                                                                                                                                                                                                                                                                                          |           |
| 13 |                                                                                              |     |                                                                                                                                                                                                                                                                                                          |           |
| 14 |                                                                                              |     |                                                                                                                                                                                                                                                                                                          |           |
| 15 |                                                                                              |     |                                                                                                                                                                                                                                                                                                          |           |
| 16 |                                                                                              |     |                                                                                                                                                                                                                                                                                                          |           |
| 17 | Links to empirical data                                                                      | #17 | Evidence (e.g. quotes, field notes, text excerpts, photographs) to substantiate analytic findings                                                                                                                                                                                                        | 6-9,11-13 |
| 18 |                                                                                              |     |                                                                                                                                                                                                                                                                                                          |           |
| 19 |                                                                                              |     |                                                                                                                                                                                                                                                                                                          |           |
| 20 |                                                                                              |     |                                                                                                                                                                                                                                                                                                          |           |
| 21 | Intergration with prior work, implications, transferability and contribution(s) to the field | #18 | Short summary of main findings; explanation of how findings and conclusions connect to, support, elaborate on, or challenge conclusions of earlier scholarship; discussion of scope of application / generalizability; identification of unique contributions(s) to scholarship in a discipline or field | 13-15     |
| 22 |                                                                                              |     |                                                                                                                                                                                                                                                                                                          |           |
| 23 |                                                                                              |     |                                                                                                                                                                                                                                                                                                          |           |
| 24 |                                                                                              |     |                                                                                                                                                                                                                                                                                                          |           |
| 25 |                                                                                              |     |                                                                                                                                                                                                                                                                                                          |           |
| 26 |                                                                                              |     |                                                                                                                                                                                                                                                                                                          |           |
| 27 |                                                                                              |     |                                                                                                                                                                                                                                                                                                          |           |
| 28 |                                                                                              |     |                                                                                                                                                                                                                                                                                                          |           |
| 29 | Limitations                                                                                  | #19 | Trustworthiness and limitations of findings                                                                                                                                                                                                                                                              | 14,15     |
| 30 |                                                                                              |     |                                                                                                                                                                                                                                                                                                          |           |
| 31 | Conflicts of interest                                                                        | #20 | Potential sources of influence of perceived influence on study conduct and conclusions; how these were managed                                                                                                                                                                                           | 16        |
| 32 |                                                                                              |     |                                                                                                                                                                                                                                                                                                          |           |
| 33 |                                                                                              |     |                                                                                                                                                                                                                                                                                                          |           |
| 34 |                                                                                              |     |                                                                                                                                                                                                                                                                                                          |           |
| 35 | Funding                                                                                      | #21 | Sources of funding and other support; role of funders in data collection, interpretation and reporting                                                                                                                                                                                                   | 16        |
| 36 |                                                                                              |     |                                                                                                                                                                                                                                                                                                          |           |
| 37 |                                                                                              |     |                                                                                                                                                                                                                                                                                                          |           |
| 38 |                                                                                              |     |                                                                                                                                                                                                                                                                                                          |           |

39 The SRQR checklist is distributed with permission of Wolters Kluwer © 2014 by the Association of American  
 40 Medical Colleges. This checklist was completed on 07. March 2019 using <https://www.goodreports.org/>, a tool  
 41 made by the [EQUATOR Network](#) in collaboration with [Penelope.ai](#)  
 42  
 43  
 44  
 45  
 46  
 47  
 48  
 49  
 50  
 51  
 52  
 53  
 54  
 55  
 56  
 57  
 58  
 59  
 60

# BMJ Open

## Collaborative design of a decision aid for stroke survivors with multimorbidity: a qualitative study engaging key stakeholders

|                                 |                                                                                                                                                                                                                                                                                                                                                                                                                                                                                   |
|---------------------------------|-----------------------------------------------------------------------------------------------------------------------------------------------------------------------------------------------------------------------------------------------------------------------------------------------------------------------------------------------------------------------------------------------------------------------------------------------------------------------------------|
| Journal:                        | <i>BMJ Open</i>                                                                                                                                                                                                                                                                                                                                                                                                                                                                   |
| Manuscript ID                   | bmjopen-2019-030385.R1                                                                                                                                                                                                                                                                                                                                                                                                                                                            |
| Article Type:                   | Research                                                                                                                                                                                                                                                                                                                                                                                                                                                                          |
| Date Submitted by the Author:   | 03-Jun-2019                                                                                                                                                                                                                                                                                                                                                                                                                                                                       |
| Complete List of Authors:       | Porat, Talya; Imperial College London, Dyson School of Design Engineering<br>Marshall, Iain; King's College London,<br>Sadler, Euan; Kings College London, Department of Primary Care and Public Health Sciences<br>Vadillo, Miguel<br>McKevitt, Christopher; King's College London, Department of Public Health Sciences<br>Wolfe, Charles; Kings College London, Health and Social Care Research<br>Curcin, Vasa; Kings College London, Primary Care and Public Health Sciences |
| <b>Primary Subject Heading</b>: | Patient-centred medicine                                                                                                                                                                                                                                                                                                                                                                                                                                                          |
| Secondary Subject Heading:      | Cardiovascular medicine, Health informatics, Qualitative research                                                                                                                                                                                                                                                                                                                                                                                                                 |
| Keywords:                       | STROKE MEDICINE, PRIMARY CARE, Learning Health System, Shared Decision Making, Decision Support System, Stakeholder Engagment                                                                                                                                                                                                                                                                                                                                                     |
|                                 |                                                                                                                                                                                                                                                                                                                                                                                                                                                                                   |

SCHOLARONE™  
Manuscripts

1  
2  
3  
4  
5  
6  
7  
8  
9  
10  
11  
12  
13  
14  
15  
16  
17  
18  
19  
20  
21  
22  
23  
24  
25  
26  
27  
28  
29  
30  
31  
32  
33  
34  
35  
36  
37  
38  
39  
40  
41  
42  
43  
44  
45  
46  
47  
48  
49  
50  
51  
52  
53  
54  
55  
56  
57  
58  
59  
60

## Collaborative design of a decision aid for stroke survivors with multimorbidity: a qualitative study engaging key stakeholders

Talya Porat<sup>\*1,2,3</sup>, Iain Marshall<sup>2,3</sup>, Euan Sadler<sup>4,5</sup>, Miguel A. Vadillo<sup>2,6</sup>, Christopher McKeivitt<sup>2,3,7</sup>, Charles D A Wolfe<sup>2,3,7</sup>, Vasa Curcin<sup>2,3,7</sup>

<sup>1</sup> Dyson School of Design Engineering, Faculty of Engineering, Imperial College London, London, UK

<sup>2</sup> School of Population Health and Environmental Sciences, Faculty of Life Sciences and Medicine, King's College London, London, UK

<sup>3</sup> National Institute for Health Research (NIHR) Collaboration for Leadership in Applied Health Research and Care South London, London, UK

<sup>4</sup> School of Health Sciences, Faculty of Environmental and Life Sciences, University of Southampton, UK

<sup>5</sup> Health Service and Population Research Department, King's Improvement Science, Centre for Implementation Science, Institute of Psychiatry, Psychology and Neuroscience, King's College London, London, UK

<sup>6</sup> Departamento de Psicología Básica, Universidad Autónoma de Madrid, Madrid, Spain

<sup>7</sup> National Institute for Health Research (NIHR) Biomedical Research Centre at Guy's and St Thomas' NHS Foundation Trust and King's College London, Tower Wing Guy's Hospital, London, UK.

### \*Corresponding author:

Dr Talya Porat  
Imperial College London  
Dyson School of Design Engineering  
Imperial College Road  
South Kensington  
London, SW7 2DB  
Tel: +44 (0)20 7594 7381  
[t.porat@imperial.ac.uk](mailto:t.porat@imperial.ac.uk)

## ABSTRACT

**Objectives:** Effective secondary stroke prevention strategies are sub-optimally used. Novel development of interventions to enable healthcare professionals and stroke survivors to manage risk factors for stroke recurrence are required. We sought to engage key stakeholders in the design and evaluation of an intervention informed by a Learning Health System approach, to improve risk factor management and secondary prevention for stroke survivors with multimorbidity.

**Design:** Qualitative, including focus groups, semi-structured interviews and usability evaluations. Data was audio-recorded, transcribed and coded thematically.

**Participants:** Stroke survivors, carers, health and social care professionals, commissioners, policy makers and researchers.

**Setting:** Stroke survivors were recruited from the South London Stroke Register; health and social care professionals through South London general practices and King's College London (KCL) networks; carers, commissioners, policy-makers and researchers through KCL networks.

**Results:** 53 stakeholders in total participated in focus groups, interviews and usability evaluations. Thirty-seven participated in focus groups and interviews, including stroke survivors and carers (N=11), health and social care professionals (N=16), commissioners and policy-makers (N=6) and researchers (N=4). Sixteen participated in usability evaluations, including stroke survivors (N=8) and general practitioners (GPs; N=8). Eight themes informed the collaborative design of DOTT (Deciding on Treatments Together), a decision aid integrated with the electronic health record system, to be used in primary care during clinical consultations between the healthcare professional and stroke survivor. DOTT aims to facilitate shared decision making on personalised treatments leading to improved treatment adherence and risk control. DOTT was found acceptable and usable among stroke survivors and GPs during a series of evaluations.

**Conclusions:** Adopting a user-centred data-driven design approach informed an intervention that is acceptable to users and has the potential to improve patient outcomes. A future feasibility study and subsequent clinical trial will provide evidence of the effectiveness of DOTT in reducing risk of stroke recurrence.

## STRENGTHS AND LIMITATIONS OF THIS STUDY

- Engaging a range of stakeholders in the design and evaluation of an intervention ensures that the intervention is in line with the needs reported by the different stakeholders (e.g., stroke survivors, healthcare professionals, policy makers).
- Adopting a Learning Health System approach enables the delivery of personalised recommendations in real time whilst simultaneously capturing additional data back into the system, to improve the system's predictive model and recommendations.
- As only stroke survivors able to attend the focus groups participated in the study, we did not elicit the views of stroke survivors who are less mobile or housebound.

## INTRODUCTION

Stroke is the second leading cause of death and a major cause of disability worldwide.<sup>1</sup> In 2015, there were 3.7 million people living with stroke as a chronic condition in Europe and this number is expected to reach 4.6 million in 2035.<sup>2</sup> Stroke survivors have a nearly 40% cumulative risk of recurrence during the first 10 years after stroke.<sup>3</sup> Secondary stroke prevention requires healthcare professionals to offer effective interventions to monitor and manage risk factors, and for patients to change health related behaviours (e.g., smoking)<sup>4</sup> and adhere to preventative medications (e.g., to control hypertension).<sup>5</sup> Follow-up appointments with clinicians offer opportunities to discuss interventions for reducing the risk of future stroke. However, long-term stroke care is characterised by a lack of continuity<sup>6</sup> and modifiable risk factors are currently not well detected, managed or controlled post stroke.<sup>7</sup>

Interventions designed to improve risk-factor management among stroke survivors in randomised controlled trials (RCTs) have shown modest or no effect. A recent Cochrane systematic review of 42 RCTs evaluating the effectiveness of educational and behavioural or organisational interventions on modifiable risk factor control for secondary prevention of stroke, found no clear benefit in any of the target outcomes (i.e., blood pressure, lipid profile, HbA1c, BMI and recurrent cardiovascular events).<sup>8</sup> Possible reasons could be that these interventions have not been part of the clinical decision-making process of clinicians, did not engage various stakeholders in the design of the intervention, and were not integrated with the Electronic Health Record (EHR) (with the exception of one study<sup>9</sup>) - all of which are considered critical features of successful clinical decision support systems.<sup>10,11</sup>

Stroke survivors commonly experience multimorbidity.<sup>12</sup> Gallacher and colleagues found that 94% of the people with stroke had one or more additional morbidities and often experienced long-term physical, psychological and social consequences.<sup>12</sup> This makes improving long-term stroke care a complex endeavour, requiring patient engagement, high quality up-to-date information and a holistic approach which focuses on the patient and not on the disease.<sup>13</sup> These aspects are important both to plan effective treatments for individual patients and guide best practice for the stroke population in general.<sup>14</sup>

The Learning Health System (LHS) 'focusses on approaches to capture data from clinical encounters and other health-related events, analyse the data to generate new knowledge, and then apply this knowledge to continuously inform and improve health decision making and practice.'<sup>15(p.177)</sup> In a recent report (2019) stating what the NHS can learn from the LHS, the authors argue that it is necessary to utilise data to transform services, not just to digitise current ways of working.<sup>16</sup> Thus, LHS outputs can provide tailored information on optimal care decisions and be delivered at the point of clinical care.<sup>17</sup>

Decision support systems (DSS) which aim to analyse a patient's characteristics to provide tailored recommendations (such as for diagnosis,<sup>18</sup> treatment or long-term management), implement this transfer of evidence into practice. This is done particularly when used in conjunction with sources of 'Real World Data'<sup>19</sup> such as EHR systems that capture detailed data on specific conditions. Such point-of-care DSS support a range of applications, including identifying patient risk estimation, providing guidance on the appropriateness of treatments, and tailoring clinical information to specific patient needs - providing the right care to the right patient at the right time.<sup>17</sup> A few studies have reported that engaging stakeholders to develop a LHS and integrated DSS improved patient outcomes and processes of care for individuals with long-term conditions.<sup>20,21</sup>

1  
2  
3 Increasingly patients are expecting to be informed and involved in their care.<sup>22</sup> This shift from  
4 imposition of professional opinion towards a more collaborative model of care is not only relevant  
5 when people face difficult decisions about their health, where there are high stakes and where  
6 outcomes are uncertain, but also in situations where people need to manage long term conditions or  
7 consider making changes in their lifestyles in order to reduce future risks.<sup>23</sup> Such shared decision  
8 making (SDM) respects patient values and preferences, and supports decision-making through the  
9 provision of high-quality, accessible information.<sup>24</sup> SDM has been found to be most effective if  
10 interventions are developed for use during the clinical encounter,<sup>25</sup> and several DSS that have been  
11 designed to facilitate SDM during the consultation (i.e., decision aids) have shown improved treatment  
12 adherence and clinical outcomes in patients with chronic conditions such as asthma and diabetes.<sup>26,27</sup>

13  
14  
15  
16  
17 In his seminal analysis, Berg criticised the 'top-down' technology centred approach to designing  
18 decision support systems.<sup>28</sup> He described an alternative *socio-technical* approach, where new tools  
19 needed to be designed taking into account the real-world complex networks of people involved in  
20 health care, and designed using an iterative approach which makes strong use of qualitative research  
21 with users.

## 22 23 24 25 **Aims and objectives**

26 The aim of this study was to engage key stakeholders to identify priorities and information needs in  
27 long term stroke care and collaboratively design and evaluate a selected intervention that could be  
28 integrated as part of the EHR system informed by a LHS approach. The data supporting the selected  
29 intervention are based on linked datasets from the South London Stroke Register (SLSR),<sup>29</sup> which  
30 includes more than 6,000 records of first-ever strokes that occur in South London, and Lambeth  
31 Datanet (LDN)<sup>30</sup> containing primary care data of local general practices in South London.

## 32 33 34 35 **METHOD**

### 36 37 38 **Patient and public involvement**

39 The design was informed by active feedback from stroke survivors and carers from King's College  
40 London's Stroke Research Patient and Family Group (SRPFG)<sup>31</sup>, a service user research group which  
41 consists of 32 participants currently on the SLSR who are from diverse socio-economic and ethnic  
42 backgrounds. Stroke survivors, carers, health and social care professionals, commissioners, policy  
43 makers and researchers were involved throughout the study in a collaborative design and evaluation  
44 process.

### 45 46 47 48 **Data collection**

49 We used a range of methods to engage stakeholders (N=53) in the design and evaluation of the  
50 intervention, including focus groups, face to face interviews and usability evaluations (see topic guides  
51 and interview questions in the supplementary files). The process involved three main stages: (1)  
52 exploring stakeholder priorities for data and information needs to inform potential solutions for long-  
53 term stroke care; (2) collaborative design of the selected intervention with stakeholders, comprising  
54 cycles of design, prototyping and evaluation; (3) Usability and acceptability evaluation of the DSS  
55 prototype (See Figure 1). Thirty-seven stakeholders participated in the first two stages, including  
56 stroke survivors and carers (N=11), health and social care professionals (N=16), commissioners and  
57 policy makers (N=6) and researchers (N=4). Sixteen stakeholders participated in the third stage,  
58  
59  
60

1  
2  
3 including 8 stroke survivors and 8 General practitioners (GPs). Stroke survivors were recruited from  
4 the SLSR. Health and social care professionals were recruited through general practices in South  
5 London and King's College London networks. Carers, commissioners, policy makers and researchers  
6 were also recruited through these networks. Stakeholders were purposively sampled to include stroke  
7 survivors (i.e. men and women, with a range of disabilities and long-term conditions, risk factors and  
8 length of time since their stroke) and professionals providing all types of stroke care and support. See  
9 Table 1 for details of all stakeholders taking part in the study. Participants could take part in the study  
10 if they were able to attend the meetings and were willing to sign a consent form. Transport was  
11 arranged for less mobile patients.  
12  
13  
14

15  
16 <Insert Figure 1 here>  
17

### 18 **Stage 1: Exploring stakeholder priorities for data and information needs**

19  
20 In total, 37 stakeholders participated in this stage. An initial stakeholder engagement meeting  
21 comprising 24 participants (SEM), 9 face to face interviews with key stakeholders who could not  
22 attend this meeting, and a second focus group involving 12 participants (FG2) were conducted (some  
23 participants took part on multiple occasions). The methods and findings from this stage of the study  
24 have been reported elsewhere.<sup>14</sup> In brief, in the initial engagement meeting (SEM), participants were  
25 introduced to the concept of a LHS and then in three separate focus groups (service user/carer; health  
26 and social care professionals; commissioners and policy makers) they were asked to identify priorities  
27 and potential solutions that may be derived from the clinical data to improve long-term stroke care  
28 for stroke survivors with multimorbidity. Then, in the larger group, through a process of priority setting  
29 and consensus led by a facilitator (ES), stakeholders identified a number of priorities and solutions to  
30 improve long-term management of stroke (i.e. improving continuity of care; improving management  
31 of mental health consequences; better access to health and social care; and targeting multiple risk  
32 factors). Targeting multiple risk factors after stroke was identified among stakeholders as a key  
33 priority, and a DSS to improve secondary prevention after stroke to target multiple risk factors was  
34 subsequently chosen within a smaller core stakeholder group (FG3) for further development. This core  
35 stakeholder group (N=12) comprised stroke survivors, healthcare professionals, carer, policy maker  
36 and commissioner, and worked collaboratively with the research team to subsequently design the  
37 intervention and to provide their active feedback.  
38  
39  
40  
41  
42  
43

### 44 **Stage 2: Collaborative design and prototyping of selected intervention**

45  
46 The initial design of the DSS to improve secondary stroke prevention and target multiple risk factors  
47 after stroke was informed by the first stage and guided by the International Patient Decision Aids  
48 Standards (IPDAS),<sup>23</sup> which provides a framework and standards for the design of patient decision aids,  
49 and the SDM model for clinical practice.<sup>32</sup> The latter provides a model of how to conduct shared  
50 decision making in practice based on providing patients choice, a range of options and involving them  
51 in 'decision talk'. Following feedback from the core stakeholder group at the third focus group meeting  
52 above (N=10) (FG3), an updated design of the intervention was subsequently reviewed by the core  
53 stakeholder group at a fourth focus group (N=9) (FG4) and was revised following their feedback. The  
54 DSS was also presented to the King's College London's SRPFG. The intervention was revised and the  
55 updated design was developed as a basic prototype and was further discussed during a subsequent  
56 focus group with the core stakeholder group (N=9) (FG5) and the SRPFG. This process allowed all  
57  
58  
59  
60



stakeholders to iteratively develop and refine the DSS to a working prototype.

### Stage 3: Usability and acceptability evaluation of the DSS

Sixteen participants, including eight stroke survivors and eight GPs participated in the usability and acceptability evaluation of the working prototype of the DSS. None had taken part in the previous stages of the study.

The evaluation included simulated consultations using the DSS prototype. In the GPs session, the researcher acted as the patient, and in the stroke patient's session, the researcher acted as the GP. GPs were given a short tutorial on how to use the DSS before the simulated consultations and stroke survivors were given a short explanation about the DSS. GPs and stroke survivors were interviewed after the simulated consultation, asking them to provide feedback on the DSS, including its strengths, limitations and suggestions for improvements. Stroke survivors and GPs also answered an acceptability questionnaire<sup>33</sup> and the System Usability Scale (SUS).<sup>34</sup> Acceptability relates to the comprehensibility of the components of the decision aid, including its length, pace, amount of information, balance in presentation and overall suitability.<sup>33</sup> Usability is 'the extent to which a product can be used by specified users to achieve specified goals with effectiveness, efficiency, and satisfaction in a specified context of use'.<sup>35</sup> The SUS is composed of 10 questions and has been shown to be a reliable and psychometrically validated tool.<sup>36</sup> Ratings were provided on 5-point Likert scales from 1 (strongly disagree) to 5 (strongly agree), with higher ratings indicating higher satisfaction.

For the usability evaluation, the DSS prototype had the following functionality and flow:

- Stroke survivors (patients) indicated their perceived risk of having a recurrent stroke.
- GPs entered the patient's characteristics (age, gender, clinical conditions).
- The system displayed a 'typical' recurrent stroke risk (age group specific average)<sup>37</sup> and the most effective treatments based on the patient's characteristics.
- The benefit of each treatment in terms of reducing the stroke risk was displayed. Estimated relative stroke risk reductions were calculated based on the existing literature.<sup>38-41</sup>
- Information and common concerns for each treatment were displayed.
- The GP and patient decided on a management plan whilst identifying desired clinical and patient outcomes.
- Patients were told that their management plan would be printed to take home.

**Table 1. Stakeholders taking part in the study**

| Type of stakeholder                            | SEM<br>(N=24) | Interviews<br>(N=9) | FG2<br>(N=12) | FG3<br>(N=10) | FG4<br>(N=9) | FG5<br>(N=9) | Usability<br>evaluation<br>(N=16) | Total<br>(N=53*) |
|------------------------------------------------|---------------|---------------------|---------------|---------------|--------------|--------------|-----------------------------------|------------------|
| <b>Stroke survivor</b>                         | <b>10</b>     |                     | <b>2</b>      | <b>2</b>      | <b>2</b>     | <b>2</b>     | <b>8</b>                          | <b>18</b>        |
| <b>Carer</b>                                   | <b>1</b>      |                     | <b>1</b>      | <b>1</b>      | <b>1</b>     | <b>1</b>     |                                   | <b>1</b>         |
| <b>Health and social care<br/>professional</b> | <b>8</b>      | <b>7</b>            | <b>3</b>      | <b>2</b>      | <b>2</b>     | <b>2</b>     | <b>8</b>                          | <b>22</b>        |
| GP                                             | 2             | 5                   | 1             | 1             | 1            | 1            | 8                                 | 13               |
| Physiotherapist                                | 2             |                     | 1             |               |              |              |                                   | 2                |
| Speech and language therapist                  | 1             |                     |               |               |              |              |                                   | 1                |
| Social care professional                       | 1             |                     |               |               |              |              |                                   | 1                |
| Public health doctor                           | 1             |                     |               |               |              |              |                                   | 1                |
| Consultant psychiatrist                        | 1             |                     |               |               |              |              |                                   | 1                |
| Occupational therapist                         |               |                     | 1             | 1             | 1            | 1            |                                   | 1                |



|                                                                                             |          |          |          |          |          |          |          |
|---------------------------------------------------------------------------------------------|----------|----------|----------|----------|----------|----------|----------|
| Acute stroke care consultant                                                                |          | 2        |          |          |          |          | 2        |
| <b>Policy makers and commissioners</b>                                                      | <b>3</b> | <b>2</b> | <b>2</b> | <b>2</b> | <b>2</b> | <b>2</b> | <b>6</b> |
| <b>Third sector representatives</b>                                                         | <b>2</b> |          |          |          |          |          | <b>2</b> |
| <b>Academic researchers</b> (social scientist, researchers working with SLSR/LDN databases) |          |          | <b>4</b> | <b>3</b> | <b>2</b> | <b>2</b> | <b>4</b> |

## Notes:

1. \*Overall 53 participants took part in the study, but a number of stakeholders took part on multiple occasions.
2. King's College London's Stroke Research Patient and Family Group (SRPFG) comprising 22 stroke survivors and carers also provided feedback on the design of the intervention in two of their meetings.

## Data Analysis

Data from focus groups and interviews were audio recorded, transcribed in full and stored in NVivo (Version 11). Qualitative data were analysed using a thematic analysis approach<sup>42</sup> to identify themes and sub-themes related to stakeholder perspectives informing the identification, design and evaluation of a DSS to improve secondary prevention for stroke survivors, which could be part of a LHS. This involved two authors (TP, ES) assigning codes and refining themes from the data, noting similarities and differences between stakeholder perspectives. The two authors have doctoral/post-doctoral experience in conducting and analysing qualitative data in applied health research.

## RESULTS

### Focus groups and interviews

Eight themes related to improving secondary prevention and management of multiple risk factors after stroke were identified from focus groups and interviews:

#### 1. Involve stroke survivors in decisions concerning their treatments

In the focus groups, stroke survivors often articulated that due to their multiple health conditions, and hence multiple risk factors for stroke recurrence, they would like to be more involved in selecting their treatments based on what is important to them and their desired outcomes. This viewpoint was further confirmed by stroke survivors participating in King's College London's SRPFG. A number of clinicians perceived that SDM did not take place on a regular basis during routine clinical consultations, and there was a need for greater involvement of stroke survivors and their carers in selecting treatments that best meet their needs and preferences. Commissioners and policy makers agreed that SDM is a necessity and noted that policies in the UK and other countries required the involvement of patients in their treatment decisions. They also emphasised the importance of data and evidence-based recommendations to improve decision making about treatments.

*"When I go to my doctor I realise it's my doctor who is making the decisions...but I think that patients now know often more about their own condition than the health professionals" (stroke survivor, SEM)*

*"This information (risk factors) which used to be something that I, as a doctor, only thought about, it's now something that we should think about together" (GP, FG5)*

*"How do we help patients and carers and health professionals together have a discussion using data information to make decisions about treatments?" (commissioner, FG2)*

## 2. Present and communicate recurrent stroke risk in a meaningful way

Both stroke survivors and healthcare professionals (in the focus groups and interviews) emphasised the importance of displaying and communicating personalised stroke risk estimation in a clear and meaningful way. Stroke survivors expressed that current risk presentations lacked clarity, with healthcare professionals agreeing with this idea, reporting that they also find it difficult to understand and communicate risk to patients whilst linking it to specific actions and behaviours among patients.

*“What is this individual’s risk of a further stroke in five years... and that’s really important because patients commonly ask us that ‘what is the risk of me having another stroke in the next year’ and we come up with a figure and we say ‘5% of whatever’” (hospital stroke physician, Interview)*

*“And I think the other thing is what actually is risk, how do you convey that, I mean, is it twice as much risk if I’ve never had a stroke...I know exactly what you mean 50% and 5% of that are meaningless to most people” (stroke survivor, FG4)*

*“Because the patients often think that the GPs – or the doctors/the specialists understand risk. It’s really difficult to understand risk and we have to use guidelines to help us with risk. So if the guidelines say, ‘This is a risk and this is the level at which you should intervene’, then I’m not well enough informed to go any further than that” (GP, FG3)*

## 3. Compare stroke survivor’s perceived stroke risk with their predicted risk

In one of the focus groups, a carer voiced the importance of allowing stroke survivors to articulate their own perceived risk of having a recurrent stroke, which could then be compared with the actual predicted risk. Professionals and lay stakeholders in the group agreed that this would facilitate a collaborative discussion on potential risk factors and their impact on stroke risk.

*“Patients themselves if they’ve been through a process will likely at some point be shown something and said either mark yourself on this, because another thing is where do you think you are on this scale at the moment with your risks, sometimes that’s quite powerful” (carer, FG4)*

## 4. Personalise treatments to help control multiple stroke risk factors

Different stakeholders in a number of the focus groups and interviews emphasised the importance of controlling multiple risk factors for stroke recurrence in stroke survivors with multimorbidity and the need to develop effective treatments based specifically on the patient’s characteristics (e.g., age, ethnicity, health conditions). Stroke survivors from the SRPFG similarly voiced their preference to know their personal risk according to their personal characteristics and receive tailored advice from professionals about what specific actions they could perform to reduce the identified risks. Commissioners were interested in care pathways for stroke patients with multimorbidity and how these care pathways could be tailored to the patient’s characteristics.

*“Patients who’ve had a confirmed stroke, the first thing as a family physician in terms of management is to make sure that you’ve controlled all their risk factors to prevent them getting another stroke” (GP, Interview)*

1  
2  
3 *“And if the system could provide him, like, tailored for the patient taking all the information*  
4 *and saying OK for this patient because he had stroke, he has diabetes and high blood pressure,*  
5 *we recommend the following care pathway, treatments” (commissioner, SEM)*  
6

7 *“Anything that can be personalised or tailored, so you don't feel it's this off the shelf thing that*  
8 *you're being given, you know... you sit with your doctor and it's not just a case of giving out a*  
9 *leaflet, but actually let's have a look at your personal data” (occupational therapist, FG4)*  
10  
11

## 12 **5. Display effectiveness of recommended treatments in reducing stroke risk**

13 The majority of health and social care professionals, commissioners and policy makers perceived that  
14 stroke survivors with multimorbidity often have multiple risk factors to manage, and that prioritising  
15 the different treatments available for secondary prevention of these risk factors was required. Stroke  
16 survivors wanted to know the relative benefit of the proposed treatments being offered by clinicians  
17 in terms of how they addressed stroke risks and to take this information into account when deciding  
18 on personalised treatments. Commissioners specifically emphasised the importance of using  
19 evidence-based data to prioritise treatments to help patients in their decision making.  
20  
21

22 *“...and you need to know, in fact, what the risk is if you do nothing compared with the risk if*  
23 *you do something” (stroke survivor, FG3)*  
24

25 *“The question might be for a patient ‘should I take a statin after a stroke’ and we might be*  
26 *able to use the database to answer the question ‘what would be the risk of future stroke if I do*  
27 *take a statin or if I don't take a statin’ and you can use that information to help to come to a*  
28 *decision together” (commissioner, SEM)*  
29  
30

31 *“Well I suppose you could think about the common comorbidities, so hypertension and stroke,*  
32 *AF (atrial fibrillation) and stroke, diabetes and stroke and you could think about not necessarily*  
33 *an algorithm but a sort of stepwise prioritisation about what you should think about in terms*  
34 *of the patient's total management, you know, which would be the most important area of*  
35 *focus?” (GP, Interview)*  
36  
37  
38  
39

## 40 **6. Address stroke survivor concerns about treatment and barriers to adherence**

41 Stroke survivors in some of the focus groups and the members of the SRPFG raised concerns about  
42 the challenges of multiple treatments they were expected to adhere to in order to decrease the  
43 potential risks of a recurrent stroke, commonly reporting that they did not always understand the  
44 value of these treatments. Several felt that a joint discussion with a healthcare professional about  
45 these concerns would help them better understand the value of a particular treatment and reach an  
46 informed decision about it. When interviewed, several GPs agreed that it was very challenging for  
47 stroke survivors with multimorbidity to adhere to multiple medications and other treatments at any  
48 given time, and that it is sometimes difficult to identify among their various treatments what is  
49 absolutely necessary and what is ‘good to have’.  
50  
51

52 *“My experience both with the doctors at the surgery and the consulting hospital is trying to*  
53 *discuss the medication that they insisted I took. I had horrendous side-effects and I kept trying*  
54 *to say to them ‘Look, I'm having these side-effects, can I change, can I reduce, can I do blah*  
55 *blah’ and their attitude I have to say, is one of terrorising patients” (stroke survivor, SEM)*  
56  
57  
58  
59  
60

1  
2  
3 *"I think that's a common problem with all patients that suffer from comorbidities. It's*  
4 *rationalising their medication and you know being able to take a holistic view of the person*  
5 *and make sensible decisions about what they absolutely need to continue on and what they*  
6 *don't. And you can only really do that just by having time with the patient, you know if it's*  
7 *important for them to be able to sort of get up and get out and about and not feel dizzy, then*  
8 *you may have to compromise on how much blood pressure medication they take" (GP,*  
9 *Interview)*

## 13 7. Support continuity of care

15 Stroke survivors commonly reported that they do not have appointments with their GP or other  
16 healthcare professionals on a regular basis. Several felt that the idea of personalised care to control  
17 stroke risk factors is very important but should have a follow-up to ensure continuity of care, which  
18 was often lacking. Some also perceived that the selected treatments and management plan should be  
19 saved on the system for future consultations and a follow-up appointment always set in advance.  
20 Commissioners also emphasised the importance of follow-up appointments and raised the concern  
21 that although follow-up appointments are an important part of stroke management and are required  
22 according to the National Institute for Health and Care Excellence (NICE) guidelines, many stroke  
23 survivors do not have follow-up appointments and do not see a GP over the longer term.

27 *"I'm just thinking of my practice where it's very difficult to get to see the same doctor and if I*  
28 *was presented with my third in line (i.e. the risk graphic display) ten times from ten different*  
29 *doctors I'd be starting to get a bit hacked off I think" (stroke survivor, FG4)*

31 *"It's not a one time thing...there needs to be continuous interaction I think if something's going*  
32 *to happen (stroke survivor, FG4).*

## 35 8. Identify stroke survivors at high risk of recurrent stroke

37 Healthcare professionals, commissioners and policy makers highlighted the need to proactively  
38 identify stroke survivors at high risk of having a recurrent stroke to assess and treat them in a timely  
39 manner. They felt that many stroke survivors, especially those with more severe long-term  
40 consequences from the stroke, do not often see a physician, and it is important to have a smart  
41 (automatic) system in place that could proactively identify them and assess their risks.

44 *"I think the challenge first of all who are the high-risk patients, can we identify them and, if we*  
45 *can, is there a way through case management or community matrons, you know, linked with*  
46 *the stroke teams in the community providing access to therapy and assessment when it's*  
47 *required in a timely fashion" (commissioner, Interview)*

### 50 Development of DOTT decision aid

51 The above themes and solutions were proposed, designed and refined during the collaborative design  
52 process with stakeholders, which informed the design of DOTT (Deciding on Treatments Together).  
53 DOTT is a computerised decision aid (i.e., a DSS designed to facilitate SDM), integrated with the EHR  
54 system, to be used in primary care during clinical consultations between the healthcare professional  
55 and stroke survivor, aiming to facilitate SDM on treatments to reduce recurrent stroke risk.

57 Specifically, DOTT will:  
58  
59  
60

- 1  
2  
3  
4 (1) Allow stroke survivors to indicate, in a graphic presentation (Figure 2), **their perceived risk of**  
5 **having a further stroke**. The graphic presentation in DOTT is based on population rank<sup>43,44</sup>  
6 simulating a queue of 20 people around the same age of the stroke survivor. Stroke survivors  
7 indicate where they think they are positioned in the queue (from least to most likely). This risk  
8 would then be compared to the actual predicted risk to facilitate conversation on risk factors.  
9 Needs from theme 3 are addressed with this feature.  
10
- 11 (2) Display **stroke survivor's predicted risk of having a further stroke** in a meaningful and  
12 understandable way for both healthcare professionals and stroke survivors. The predicted stroke  
13 risk will be calculated based on the patient's information from the EHR and on rules generated  
14 from the linked dataset (SLSR and LDN). Needs from theme 2 are addressed with this feature (see  
15 Figure 2).  
16
- 17 (3) Provide a **list of personalised recommended treatments** for stroke survivors based on their risk  
18 factors (e.g., hypertension, atrial fibrillation) extracted from the EHR. A list of the most effective  
19 evidence-based treatments for secondary prevention would be compiled and extracted from the  
20 recent NICE guidelines<sup>45</sup> and the National Clinical Guideline for Stroke.<sup>46</sup> This includes both clinical  
21 and lifestyle recommendations. For each recommended treatment, the evidence supporting the  
22 treatment will also be displayed. Needs from section 4 are addressed with this feature.  
23
- 24 (4) **Prioritise the recommended treatments** based on their relative risk reduction and present the  
25 most effective treatment first. The clinician and stroke survivor can select one or more treatments  
26 and see on the graphic display, how the treatments reduce the overall stroke risk. The benefit of  
27 each treatment in terms of stroke risk will be calculated using the linked dataset (SLSR and LDN).  
28 Needs from theme 5 are addressed with this feature.  
29
- 30 (5) **Display stroke survivors' common concerns** on the suggested treatments (e.g., "do I have to take  
31 blood pressure drugs for life?"), which will aid in identifying and addressing barriers to treatment  
32 adherence and eliciting preferences. An initial list of concerns and their response was prepared  
33 based on qualitative studies eliciting patients' barriers to treatment adherence.<sup>47,48</sup> Needs from  
34 theme 6 are addressed with this feature  
35
- 36 (6) Allow stroke survivors and their carers to discuss the different treatments with the healthcare  
37 professional and **jointly select the treatments that best suit the stroke survivor's preferences,**  
38 **desired outcomes and goals** (and remove the ones that do not). Lifestyle modification will be  
39 discussed during the consultation and enhanced through referral to specialists or lifestyle  
40 intervention programs. The agreed management plan and information on the different  
41 treatments will be printed and handed to the stroke survivor to take home. Needs from theme 1  
42 are addressed with this feature.  
43
- 44 (7) Set automatically a **follow-up appointment** in 3 months' time. The information entered, including  
45 the agreed management plan is saved and transferred back to the stroke survivor's EHR for future  
46 consultations. During the follow-up consultation, the management plan is reviewed and  
47 treatments to address risk factors for stroke recurrence can be added, modified or removed.  
48 Desired clinical and patient outcomes will also be reviewed. Current NICE guidelines<sup>45</sup> for  
49 'Secondary prevention following stroke and TIA' recommend primary care follow up on discharge,  
50 six months and then annually. A three-month follow up was selected as a reasonable interval for  
51 healthcare professionals and to provide enough time for patients to adhere to the selected  
52 treatments. Needs from theme 7 are addressed with this feature.  
53
- 54 (8) The stroke prediction model will also be used to **proactively identify individuals at high risk of a**  
55 **recurrent stroke** by calculating their recurrent stroke risk at defined periods of time (the practice  
56  
57  
58  
59  
60

1  
2  
3 can define the desired threshold) and alert the practice (e.g., physician, nurse, receptionist) to  
4 invite those patients for a clinical consultation. Needs from theme 8 are addressed with this  
5 feature.  
6

- 7 (9) All information from patients and healthcare professionals (e.g., treatments selected by the  
8 patient, desired outcomes, predicted stroke risk, results in follow-up) will be **captured by the**  
9 **system as part of a LHS** and be used to improve the system's predictive model and treatment  
10 recommendations.  
11  
12

13 Figure 2 depicts an example screenshot from DOTT decision aid prototype.  
14

15 <Insert Figure 2 here>  
16

## 17 Usability and acceptability evaluation

### 18 Demographics

19  
20 Eight stroke survivors and eight GPs participated in the usability and acceptability evaluations. GPs (4  
21 men, 4 women) had average of 10.3 years of experience as a GP. All had experience in providing care  
22 to stroke survivors, had medium to high confidence in using new technology and low to medium  
23 experience using DSS. Stroke survivors (4 men, 4 women) had an average age of 65.5 years (SD: 11.4,  
24 range: 49-81). All had hypertension, two had heart problems, one was suffering from depression, four  
25 had mobility issues, and four had minor cognitive deficiencies (attention and memory).  
26  
27  
28  
29

### 30 Usability and acceptability

31  
32 Both GPs and stroke survivors found the decision aid usable and acceptable. GPs found the decision  
33 aid easy to use (score 4.3), easy to understand (4.1) and felt very confident using it (4.2). They thought  
34 that this decision aid was better than how they usually helped patients decide about treatments for  
35 controlling their risk factors (4.4), that this strategy was compatible with the way they thought things  
36 should be done (4.3), that this type of decision aid was suitable for helping patients make informed  
37 choices (4.0) and that the decision aid complemented their usual approach (4.4). Stroke survivors  
38 perceived that they would like to use the decision aid frequently (4.0), thought that it was easy to use  
39 (4.2) and felt confident using it (4.1). Initial findings of the usability evaluation can be found in Porat  
40 et al.<sup>49</sup>  
41  
42  
43  
44

### 45 Identified themes

46  
47 Seven main themes relating to the usability and acceptability of the decision aid were identified. These  
48 were divided into themes relating to the importance of the decision aid, its functionality and concerns  
49 from using it.  
50

#### 51 *Importance of the decision aid*

##### 52 Logical and structured process that facilitates discussion

53  
54 All GPs and stroke survivors (N=16) found the decision aid to be clear, and consisting of a logical flow  
55 that helped to structure the consultation. They felt that the decision aid facilitated a transparent  
56 discussion on the different proposed treatments and elicited patients' preferences.  
57

58 *"Physician pointing out what to do but the patient makes the decision since it's hard to get*  
59 *your head around everything. More doable if you have specific areas to work on with specific*  
60



1  
2  
3 *targets that suits you” (stroke survivor 2)*  
4

#### 5 Importance of a learning system

6 Several GPs (N=3) raised the importance of a learning system providing up-to-date information. They  
7 wanted to make sure that the suggested treatments are in line with the most up-to-date evidence.  
8

9  
10 *“The learning aspect is very important, since this system is based on evidence and evidence  
11 can change” (GP 6)*  
12

#### 13 Can motivate patients to change behaviour

14 All GPs and stroke survivors (N=16) believed that the decision aid could motivate patients to change  
15 behaviour (e.g., take their medication to reduce blood pressure, increase physical activity, eat healthy).  
16 Stroke survivors liked the idea of being involved in deciding on their treatments according to their  
17 preferences and abilities, receiving information on their stroke risk factors, and discussing their views  
18 and concerns with their GP. They felt it gave them more control over their health and motivation to  
19 adhere to the treatments they selected. GPs felt it was a good way to discuss the different treatments  
20 and give patients the power to decide on treatments that suit them. A number of GPs and stroke  
21 survivors agreed that sharing decisions and enabling patients to select the treatments that best meet  
22 their preferences and goals, may increase patients’ feeling of ownership over their health and improve  
23 adherence to the selected treatments.  
24  
25

26  
27  
28 *“I believe discussing the different options with the patients, shared decision making, is likely  
29 to improve adherence” (GP 1).*  
30

#### 31 *Functionality*

#### 32 Powerful risk display showing the benefit of each treatment

33 The vast majority of GPs and stroke survivors (N=15) found the visual display showing the risk before  
34 and after a selected intervention, easy to understand, with some viewing it as a ‘powerful’ tool. Both  
35 stroke survivors and GPs commented that they were not aware of the effect the treatments have on  
36 reducing the stroke risk.  
37  
38

39  
40  
41 *“The most powerful thing is the visual shifting of risk” (GP 5)*

42  
43 *“Wow, a small change can make a big difference, this is very encouraging” (stroke survivor 6)*  
44

#### 45 The patient takes home printed information

46 GPs and stroke survivors (N=10) thought that it was very important that the patient has a copy of the  
47 management plan and all the information printed so they can review it at home. In particular, stroke  
48 survivors wanted to have their current predicted risk and information on their selected treatments,  
49 including the date of the follow up appointment printed out, so it could motivate them to adhere to  
50 their treatments.  
51

52  
53 *“The important thing is that the patient goes out with a piece of paper that summarises in  
54 bullet points the outcome of the consultation. If its black and white on paper it makes a  
55 difference” (stroke survivor 3)*  
56

#### 57 *Concerns*

58  
59 GPs and stroke survivors raised two main concerns from using the decision aid.  
60

### Deals with one aspect of the consultation

GPs and stroke survivors (N=6) felt that the decision aid is good but focuses on one aspect of the consultation (reducing risk of recurrent stroke) and patients may have other concerns, such as depression or social isolation.

*“This is good, but for me the most important thing is the emotional aspect, and this tool doesn’t relate to that” (stroke survivor 4)*

### Time

The main concern for GPs was time (N=6), in which within the allotted standard 10 minutes for the consultation already provided significant limits, and most felt they will not manage to fit it in.

### **Suggestions for improvement**

GPs and stroke survivors provided suggestions for improving the decision aid:

1. The terminology was too clinical, for example “treatments” and “management”, could be changed to “possible strategies or approaches”.
2. In addition to the management plan, information (e.g., in the form of a leaflet) on each of the selected treatments should also be printed out and given to patients.
3. Add clinical data, for example when clicking on “cholesterol” show the patient’s last three values, and do this also for their blood pressure.
4. Enable more than one display of risk, because each patient may prefer a different display and understands risk differently.
5. Add emotional and mental health aspects which are related to stroke risk.

We subsequently made the above changes and additions to the updated version of DOTT.

### **DISCUSSION**

Our work focused on engaging various stakeholders in the identification, design, prototyping and evaluation of a decision aid to improve secondary prevention after stroke. Eight themes informed the design of DOTT. A number of the themes and solutions proposed by the stakeholders have been implemented previously to some extent to support other patient groups, such as diabetes and atrial fibrillation.<sup>50,51</sup> These include, predicting a patient’s risk based on their risk factors, proposing possible treatments and displaying their benefit in decreasing the risk<sup>50</sup> and incorporating patients’ concerns within the decision making process.<sup>51</sup> These themes were found useful and are recommended in SDM tools (e.g., in the IPDAS<sup>23</sup>).

Additional unique themes and solutions have emerged as outcomes of the collaborative design process in this study, which could be used for a range of chronic diseases requiring long-term management. Specifically:

(1) **Present and communicate risk in a meaningful way.** While there are many different ways to communicate multiple risks to patients, the most commonly used are absolute or relative risks presented as percentages or probabilities (e.g., “from 100 people like you 20 are expected to have a recurrent stroke”).<sup>52</sup> However, studies have shown that in general, healthcare professionals are as unfamiliar as their patients with risk estimates and probabilities<sup>53</sup> and often healthcare professionals have reported finding it difficult to combine multiple risk factors into an accurate assessment of



1  
2  
3 vascular risk<sup>54</sup> and to communicate this risk to patients.<sup>55</sup> Moreover, patients may feel that statistical  
4 risk estimates do not apply to them personally.<sup>56</sup> To overcome this, our graphic presentation is based  
5 on population rank, simulating the patient in a queue of people around their age.<sup>43,44</sup> Studies have  
6 also shown that formats which present data framed as the risk of an individual were perceived as  
7 more relevant and easier to relate to than percentage risk estimates.<sup>57</sup>  
8  
9

10 **(2) Compare patient's perceived risk with their predicted risk.** This is a novel requirement from a DSS,  
11 which to our knowledge does not exist in current systems. Perceived risk of adverse outcomes such  
12 as stroke may be an important concept in understanding patient's adherence to medication and  
13 recommended health behaviours.<sup>58</sup> Overall, patients tend to underestimate their own risk.<sup>59</sup> This  
14 tendency was also found when patients estimated their cardiovascular risk.<sup>60</sup> Weinstein refers to this  
15 underestimation as an "optimistic bias".<sup>59</sup> For example, a recent study found that people with  
16 undiagnosed diabetes or prediabetes considerably underestimated their probability to have or  
17 develop diabetes.<sup>61</sup> Lower perceived risk has been associated with poorer adherence to  
18 recommended health behaviours<sup>62</sup> and hence a more realistic perception of risk may increase  
19 patients' interest in risk reduction.<sup>62</sup> Research has shown that individualised risk feedback was  
20 effective in increasing perceived stroke risk among patients who had underestimated their stroke risk  
21 at baseline.<sup>63</sup> This may imply that eliciting patients' perceived risk and showing them the actual  
22 predicted risk can change their inaccurate risk perception and increase their interest in risk reduction.  
23  
24  
25  
26

27 **(3) Prioritising treatments.** Healthcare professionals have previously expressed concerns about  
28 managing care and making decisions about treatments, including communicating risks and benefits  
29 for patients with multimorbidity and complex needs.<sup>64</sup> They commonly report having to make  
30 decisions with such patients which involve a process of prioritisation or trade-offs, facilitating a  
31 discussion with the patient on what is important to the patient and what they would like to achieve  
32 in terms of their health (i.e. goal setting).<sup>64</sup> Aligning patient goals and desired outcomes with clinicians'  
33 goals is likely to improve outcomes for these patients.<sup>65</sup>  
34  
35  
36

37 **(4) Identify individuals at high risk.** Calculating periodically (in an automatic way) the stroke risk of  
38 survivors to identify individuals at high risk of recurrent stroke (based on their information in the EHR)  
39 could be a valuable feature for improving long-term management and care for stroke survivors who  
40 are less likely or able to visit healthcare professionals on a regular basis. This theme was identified and  
41 prioritised by healthcare professionals and commissioners/policy makers and not by stroke survivors  
42 or carers, emphasising the importance of treating vulnerable patients in a timely manner and provide  
43 proactive patient-centred care. This is in line with the NHS Long Term Plan set in 2019.<sup>66</sup>  
44 Patients/carers who participated in the focus groups were relatively mobile and maybe this was less  
45 of a priority for them.  
46  
47  
48

49 These solutions, which are delivered through a DSS integrated with the EHR system and based on data  
50 from a linked population dataset, have the potential to be an instrument of change in clinical practice.  
51 This will be done by providing scientific evidence at the point of clinical care (e.g., personalised  
52 treatments and their benefit based on the individual's risk factors), while simultaneously collecting  
53 information from that care (e.g., treatments selected by the patient, desired outcomes, predicted  
54 stroke risk) to promote innovation in optimal healthcare delivery.<sup>17</sup>  
55  
56  
57

## 58 **Strengths and limitations**

59 Although the core focus of the DSS (prevention of a future stroke) was identified by patients as a  
60

1  
2  
3 priority, having a single focus might hinder discussions of other important problems (e.g., depression,  
4 social isolation). Such issues may even have a larger perceived impact on long-term outcomes after  
5 stroke, for example, improving mental health or access to social care services, which were also  
6 brought up by stakeholders as a priority to address long-term care for stroke survivors with  
7 multimorbidity,<sup>14</sup> and were raised as a concern in the usability and acceptability evaluations.  
8 Depression is indeed a risk factor of stroke,<sup>67</sup> and the treatment 'manage low mood/depression' will  
9 be displayed to all patients, enabling healthcare professionals to relate to this aspect and propose  
10 ways to manage this (e.g., medication, referral to a professional, group therapy).  
11  
12  
13

14  
15 In a study assessing stroke survivors' self-reported needs,<sup>68</sup> more than 50% of long-term stroke  
16 survivors reported an unmet need for stroke information (e.g. cause, prevention of recurrence). The  
17 proposed decision aid offers a meaningful starting point for addressing this common unmet need.  
18 Evidence suggests that the provision of lifestyle advice from healthcare professionals' is effective in  
19 changing health behaviours<sup>69</sup> and healthcare professionals' communication is positively correlated  
20 with patient adherence to treatments.<sup>70</sup> However, a conversation-based DSS also relies on the  
21 attitudes and communication skills of the healthcare professionals, which have been found to vary.<sup>71</sup>  
22 Interactive SDM skill training has improved SDM skills and promoted positive attitudes.<sup>72</sup> Training  
23 healthcare professionals in communication skills for SDM has also been shown to result in substantial  
24 and significant improvement in patient adherence to treatments.<sup>70</sup> Hence, interactive SDM skills  
25 training workshops will have to complement the use of the DSS. Patients are also likely to need support  
26 and preparation with taking part in SDM during the consultation.<sup>72</sup>  
27  
28  
29  
30

31  
32 The design of DOTT meets the IPDAS collaboration criteria for quality decision aids.<sup>23</sup> Specifically, DOTT  
33 was designed to incorporate principles of SDM, by presenting stroke survivors with information about  
34 their treatment options and likely outcomes, presenting the risks and benefits of each option, and  
35 engaging the healthcare professional and stroke survivor in a joint conversation about the patient's  
36 preferences.<sup>32</sup> Furthermore, DOTT evolves from a systematic development process, uses non-  
37 technical language and presents information in a balanced manner that allows for comparisons across  
38 alternatives.<sup>23</sup> Wearable sensors (e.g., Fitbit, Apple Watch, blood pressure monitor) could further help  
39 patients monitor and self-manage the selected treatments (e.g., control blood pressure, increase  
40 physical activity) outside the consultation. In the future, data from wearable sensors could be  
41 integrated to the EHR, and DOTT could use this information to improve its risk prediction model and  
42 treatment recommendations.  
43  
44  
45

46  
47 In the usability and acceptability evaluation, stroke survivors and GPs found DOTT to be both useful  
48 and usable. GPs perceived that the decision aid helped with structuring the consultation and eliciting  
49 patients' preferences for treatments. Stroke survivors felt it provides a good way to understand the  
50 different treatment options and select the ones that best suits their preferences. GPs' main concern  
51 was that the decision aid would increase consultation times. Indeed, time constraints were identified  
52 as the main barrier for the adoption of innovations by family physicians.<sup>73,74</sup> A possible solution could  
53 be to use the decision aid as part of a clinical review after stroke, which is usually longer (e.g., 3 month,  
54 6 month and annual review) and by dedicated healthcare professionals which are less limited in time  
55 such as stroke nurses and pharmacists working in GPs' practices that are trained to consult patients  
56 with chronic and long-term health conditions.  
57  
58  
59  
60

## CONCLUSION

Engaging various stakeholders throughout the design and evaluation process ensures that the intervention (features and functions) is in line with the needs reported by the different stakeholders (i.e., stroke survivors, healthcare professionals, policy makers). DOTT has demonstrated the potential to reduce stroke recurrence by adopting a data-driven user-centred approach. DOTT urges clinicians to shift away from the professionally led advice-giving approach typically used in medical consultations to one which collaboratively and actively engages the patient in decision making and respects patient choice and autonomy. This may lead to stroke survivors taking ownership for the treatment decisions, improving their adherence to the agreed management plan and thus reducing their stroke risk. A future feasibility study and subsequent clinical trial will evaluate the effectiveness of DOTT in improving decision making quality, and whether it affects risk factor levels and risk of recurrence. While DOTT currently targets stroke risk factors only, the design approach could be used for a range of chronic diseases requiring long-term management, paving the way to a set of standards for delivering LHS interventions in clinical practice.

**Acknowledgments:** The research team are very grateful to all the stakeholders that participated in the study including stroke survivors, carers, healthcare professionals, policy makers and commissioners. We would like to thank specifically the King's College London Stroke Research Patients and Family Group for their valuable comments that helped improve the design of the decision aid.

**Author Contributions:** Conception and design of study: TP, IM, ES, MAV, CK, CDAW, VC. Data collection: TP, IM, ES. Thematic Analysis and interpretation of data: TP, IM, ES, MAV, VC. Initial draft of manuscript: TP. Revising the paper critically for important intellectual content: TP, IM, ES, MAV, CK, CDAW, VC. Sign off final version of manuscript: TP, IM, ES, MAV, CK, CDAW, VC.

**Funding:** This work was supported by the National Institute for Health Research (NIHR) Collaboration for Leadership in Applied Health Research and Care (CLAHRC) South London at King's College Hospital NHS Foundation Trust, and the NIHR Biomedical Research Centre, Guy's and St Thomas' NHS Foundation Trust and King's College London, UK (award number NIHR CLAHRC-2013-10022). The views expressed are those of the authors and not necessarily those of the NIHR or the Department of Health and Social Care.

**Competing interests:** None declared.

**Patient consent:** Not required.

**Ethics approval:** Approval for stages one and two of this study was granted by the National Research Ethics Service (NRES) Committee North East-Tyne and Wear South (REC reference number: 14/NE/1149) and for stage three of this study by the East of England – Cambridgeshire and Hertfordshire Research Ethics Committee (REC reference number: 17/EE/0161).

**Data sharing statement:** There are no additional data available from this study.

**Checklist for reporting guidelines:** the authors used SRQR guidelines for reporting qualitative research.

## REFERENCES

1. Katan M, Luft A. Global burden of stroke. In *Seminars in neurology* 2018 Apr; 38(2):208-211. Thieme Medical Publishers.
2. King's College London. The burden of stroke in Europe, the challenge for policy makers for the Stroke Alliance for Europe (SAFE); 2015.
3. Mohan KM, Wolfe CD, Rudd AG, Heuschmann PU, Kolominsky-Rabas PL, Grieve AP. Risk and cumulative risk of stroke recurrence: a systematic review and meta-analysis. *Stroke* 2011;42:1489–94.
4. Stroke Association UK, State of the Nation, stroke statistics, February 2018. [https://www.stroke.org.uk/system/files/sotn\\_2018.pdf](https://www.stroke.org.uk/system/files/sotn_2018.pdf)
5. Kernan WN, Ovbiagele B, Black HR, Bravata DM, Chimowitz MI, Ezekowitz MD, Fang MC, Fisher M, Furie KL, Heck DV, Johnston SC. Guidelines for the prevention of stroke in patients with stroke and transient ischemic attack: a guideline for healthcare professionals from the American Heart Association/American Stroke Association. *Stroke*. 2014 Jul;45(7):2160-236.
6. Chen R, McKeivitt C, Crichton SL, Rudd AG, Wolfe CD. Socioeconomic deprivation and provision of acute and long-term care after stroke: the South London Stroke Register cohort study. *J Neurol Neurosurg Psychiatry*. 2014 Dec 1;85(12):1294-300.
7. Marshall IJ, Wang Y, McKeivitt C, Rudd AG, Wolfe CD. Trends in risk factor prevalence and management before first stroke: data from the South London Stroke Register 1995–2011. *Stroke*. 2013 Jul;44(7):1809-16.
8. Bridgwood B, Lager KE, Mistri AK, Khunti K, Wilson AD, Modi P. Interventions for improving modifiable risk factor control in the secondary prevention of stroke. *Cochrane Database of Systematic Reviews*. 2018(5).
9. Dregan A, van Staa TP, McDermott L, McCann G, Ashworth M, Charlton J, Wolfe CD, Rudd A, Yardley L, Gulliford MC, Meredith S. Point-of-care cluster randomized trial in stroke secondary prevention using electronic health records. *Stroke*. 2014 Jul;45(7):2066-71.
10. Kawamoto K, Houlihan CA, Balas A, Lobach DF. Improving clinical practice using clinical decision support systems: A systematic review of trials to identify features critical to success. *British Medical Journal* 2005;330:765–768.
11. Shibl R, Lawley M, Debuse J. Factors influencing decision support system acceptance. *Decision Support Systems* 2013;54:953–961
12. Gallacher, K. I., Batty, G. D., McLean, G., Mercer, S. W., Guthrie, B., May, C. R., ... & Mair, F. S. Stroke, multimorbidity and polypharmacy in a nationally representative sample of 1,424,378 patients in Scotland: implications for treatment burden. *BMC medicine* 2014; 12(1), 151.
13. Guthrie B, Payne K, Alderson P, McMurdo ME, Mercer SW. Adapting clinical guidelines to take account of multimorbidity. *Bmj*. 2012 Oct 4;345:e6341.
14. Sadler E, Porat T, Marshall I, Hoang U, Curcin V, Wolfe CD, McKeivitt C. Shaping innovations in long-term care for stroke survivors with multimorbidity through stakeholder engagement. *PloS one* 2017;12(5):e0177102.
15. Nwaru BI, Friedman C, Halamka J and others (2017) 'Can learning health systems help organisations deliver personalised care?', *BMC Med* 2017 15: 177
16. Scobie S, Castle-Clarke, S. What can the NHS learn from learning health systems? Nuffield Trust, May, 2019.
17. Maddox TM, Albert NM, Borden WB, Curtis LH, Ferguson TB, Kao DP, ... Shah ND. The Learning Healthcare System and Cardiovascular Care: A Scientific Statement From the American Heart Association. *Circulation* 2017;135(14):e826-e857.

18. Kostopoulou O, Porat T, Corrigan D, Mahmoud S, Delaney BC. Diagnostic accuracy of GPs when using an early intervention decision support system: a high-fidelity simulation. *Br J Gen Pract*. 2017.
19. Califf RM, Robb MA, Bindman AB, Briggs JP, Collins FS, Conway PH, ... Dymek C. Transforming evidence generation to support health and health care decisions. *N Engl J Med* 2016; 375:2395-2400.
20. Crandall W, Kappelman MD, Colletti RB, Leibowitz I, Grunow JE, Ali S, et al. ImproveCareNow: the development of a paediatric inflammatory bowel disease improvement network. *Inflammatory Bowel Diseases*. 2011; 17(1): 450–57. pmid:20602466
21. Starks H, Shaw JL, Hiratsuka V, Dillard DA, Robinson R. Engaging stakeholders to develop a depression management decision support tool in a tribal health system. *Quality of Life Research*. 2015; 24(5), 1097–105. pmid:25246185
22. Chewning B, Bylund CL, Shah B, Arora NK, Gueguen JA, Makoul G. Patient preferences for shared decisions: a systematic review. *Patient education and counseling*. 2012 Jan 1;86(1):9-18.
23. Elwyn G, O'Connor A, Stacey D, Volk R, Edwards A, Coulter A, Thomson R, Barratt A, Barry M, Bernstein S, Butow P. Developing a quality criteria framework for patient decision aids: online international Delphi consensus process. *Bmj*. 2006 Aug 24;333(7565):417.
24. Barry MJ, Edgman-Levitan S. Shared decision making—the pinnacle of patient-centered care. *New England Journal of Medicine* 2012;366(9):780-781.
25. Stiggelbout AM, Van der Weijden T, De Wit MP, Frosch D, Légaré F, Montori VM, Trevena L, Elwyn G. Shared decision making: really putting patients at the centre of healthcare. *Bmj*. 2012 Jan 27;344:e256.
26. Heisler M, Bouknight RR, Hayward RA, Smith DM, Kerr EA. The relative importance of physician communication, participatory decision making, and patient understanding in diabetes self-management. *Journal of General Internal Medicine* 2002;17(4):243-252.
27. Wilson SR, Strub P, Buist AS, Knowles SB, Lavori PW, Lapidus J, Vollmer WM. Shared treatment decision making improves adherence and outcomes in poorly controlled asthma. *American journal of respiratory and critical care medicine*. 2010 Mar 15;181(6):566-77.
28. Berg M. Patient Care Information Systems and Health Care Work: A Sociotechnical Approach. *International Journal of Medical Informatics* 1999;55(2):87–101.
29. Stewart JA, Dundas R, Howard RS, Rudd AG, Wolfe CDA. Ethnic differences in incidence of stroke: prospective study with stroke register. *BMJ*, 1999;318(7189):967-971.
30. Schofield P, Baawuah F, Seed PT, Ashworth M. Managing hypertension in general practice: a cross-sectional study of treatment and ethnicity. *Br J Gen Pract*. 2012 Oct 1;62(603):e703-9.
31. King's College London's Stroke Research Patient and Family Group (SRPFG). [www.kcl.ac.uk/lsm/research/divisions/hscr/research/groups/stroke/forpatientsandfamily/patientsandfamily.aspx](http://www.kcl.ac.uk/lsm/research/divisions/hscr/research/groups/stroke/forpatientsandfamily/patientsandfamily.aspx)
32. Elwyn G, Frosch D, Thomson R, Joseph-Williams N, Lloyd A, Kinnersley P, Cording E, Tomson D, Dodd C, Rollnick S, Edwards A. Shared decision making: a model for clinical practice. *Journal of general internal medicine*. 2012 Oct 1;27(10):1361-7.
33. O'Connor AM, Cranney A. User Manual-Acceptability. Ottawa Hospital Research Institute, 2002.
34. Brooke J. SUS-A quick and dirty usability scale. *Usability evaluation in industry*, 1996;189:4-7.
35. ISO 9241-210:2010. Ergonomics of human system interaction – part 210 Human-centred design for interactive systems. <https://www.iso.org/standard/52075.html>



- 1
  - 2
  - 3
  - 4
  - 5
  - 6
  - 7
  - 8
  - 9
  - 10
  - 11
  - 12
  - 13
  - 14
  - 15
  - 16
  - 17
  - 18
  - 19
  - 20
  - 21
  - 22
  - 23
  - 24
  - 25
  - 26
  - 27
  - 28
  - 29
  - 30
  - 31
  - 32
  - 33
  - 34
  - 35
  - 36
  - 37
  - 38
  - 39
  - 40
  - 41
  - 42
  - 43
  - 44
  - 45
  - 46
  - 47
  - 48
  - 49
  - 50
  - 51
  - 52
  - 53
  - 54
  - 55
  - 56
  - 57
  - 58
  - 59
  - 60
36. Lewis, J. R., & Sauro, J. (2009). The factor structure of the System Usability Scale. In *Human-centered design* (pp. 94–103). Berlin, Germany: Springer. doi:10.1007/978-3-642-02806-9\_12
37. Mohan KM, Crichton SL, Grieve AP, et al. Frequency and predictors for the risk of stroke recurrence up to 10 years after stroke: the South London Stroke Register. *Journal of Neurology, Neurosurgery & Psychiatry*. 2009 May 21.
38. Hankey GJ. Secondary stroke prevention. *The Lancet Neurology*. 2014 Feb 1;13(2):178-94.
39. Hankey GJ. Stroke: how large a public health problem, and how can the neurologist help?. *Archives of neurology*. 1999 Jun 1;56(6):748-54.
40. Mora S, Cook N, Buring JE, et al. Physical activity and reduced risk of cardiovascular events: potential mediating mechanisms. *Circulation*. 2007 Nov 6;116(19):2110-8.
41. He FJ, Nowson CA, MacGregor GA. Fruit and vegetable consumption and stroke: meta-analysis of cohort studies. *The Lancet*. 2006 Jan 28;367(9507):320-6.
42. Braun V, Clarke V. Using thematic analysis in psychology. *Qualitative Research in Psychology*; 2006;3:77–101.
43. Tunstall-Pedoe H. The Dundee coronary risk-disk for management of change in risk factors. *BMJ* 1991;303:744–747.
44. Marshall IJ, Wolfe CD, McKeivitt C. ‘People like you?’: how people with hypertension make sense of future cardiovascular risk—a qualitative study. *BMJ open*. 2018 Nov 1;8(11):e023726.
45. NICE Guidelines. Stroke and TIA. Scenario: Secondary prevention following stroke and TIA. <https://cks.nice.org.uk/stroke-and-tia#!scenario:2>
46. Intercollegiate Stroke Working Party (ISWP). National Clinical Guideline for Stroke, 5th edn. 2016. London: Royal College of Physicians. [https://www.strokeaudit.org/SupportFiles/Documents/Guidelines/2016-National-Clinical-Guideline-for-Stroke-5t-\(1\).aspx](https://www.strokeaudit.org/SupportFiles/Documents/Guidelines/2016-National-Clinical-Guideline-for-Stroke-5t-(1).aspx)
47. Marshall IJ, Wolfe CD, McKeivitt C. Lay perspectives on hypertension and drug adherence: systematic review of qualitative research. *BMJ*, 2012;345:e3953.
48. Pound P, Britten N, Morgan M, Yardley L, Pope C, Daker-White G, Campbell R. Resisting medicines: a synthesis of qualitative studies of medicine taking. *Social science & medicine*. 2005 Jul 1;61(1):133-55.
49. Porat T, Liao Z, Curcin V. Engaging Stakeholders in the Design and Usability Evaluation of a Decision Aid to Improve Secondary Stroke Prevention. *Studies in health technology and informatics*. 2018;247:765-9.
50. Nolan T, Dack C, Pal K, Ross J, Stevenson FA, Peacock R, Pearson M, Spiegelhalter D, Sweeting M, Murray E. Patient reactions to a web-based cardiovascular risk calculator in type 2 diabetes: a qualitative study in primary care. *Br J Gen Pract*. 2015 Mar 1;65(632):e152-60.
51. Kaiser K, Cheng WY, Jensen S, Clayman ML, Thappa A, Schwiep F, Chawla A, Goldberger JJ, Col N, Schein J. Development of a shared decision-making tool to assist patients and clinicians with decisions on oral anticoagulant treatment for atrial fibrillation. *Current medical research and opinion*. 2015 Dec 2;31(12):2261-72.
52. Ahmed H, Naik G, Willoughby H, Edwards AG. Communicating risk. *Bmj*. 2012 Jun 18;344:e3996.
53. Perneger TV, Agoritsas T. Doctors and patients’ susceptibility to framing bias: a randomized trial. *Journal of General Internal Medicine*, 2011;26(12):1411-1417.
54. Kenning C, Fisher L, Bee P, Bower P, Coventry P. Primary care practitioner and patient understanding of the concepts of multimorbidity and self-management: A qualitative study. *Sage Open Medicine* 2013.

- 1
  - 2
  - 3
  - 4
  - 5
  - 6
  - 7
  - 8
  - 9
  - 10
  - 11
  - 12
  - 13
  - 14
  - 15
  - 16
  - 17
  - 18
  - 19
  - 20
  - 21
  - 22
  - 23
  - 24
  - 25
  - 26
  - 27
  - 28
  - 29
  - 30
  - 31
  - 32
  - 33
  - 34
  - 35
  - 36
  - 37
  - 38
  - 39
  - 40
  - 41
  - 42
  - 43
  - 44
  - 45
  - 46
  - 47
  - 48
  - 49
  - 50
  - 51
  - 52
  - 53
  - 54
  - 55
  - 56
  - 57
  - 58
  - 59
  - 60
55. Redfern J, Rudd AD, Wolfe CD, McKeivitt C. Stop stroke: development of an innovative intervention to improve risk factor management after stroke. *Patient education and counseling*. 2008 Aug 1;72(2):201-9.
56. Emmons KM, Koch-Weser S, Atwood K, Conboy L, Rudd R, Colditz G. A qualitative evaluation of the Harvard Cancer Risk Index. *Journal of health communication*. 1999 Sep 1;4(3):181-93.
57. Soureti A, Hurling R, Murray P, van Mechelen W, Cobain M. Evaluation of a cardiovascular disease risk assessment tool for the promotion of healthier lifestyles. *European Journal of Cardiovascular Prevention & Rehabilitation*,2010;17(5):519-523.
58. Powers BJ, Oddone EZ, Grubber JM, Olsen MK, Bosworth HB. Perceived and actual stroke risk among men with hypertension. *The Journal of Clinical Hypertension*. 2008 Apr;10(4):287-94.
59. Weinstein ND. Why it won't happen to me: perceptions of risk factors and susceptibility. *Health Psychol*. 1984;3:431-457.
60. Petr EJ, Ayers C, Pandey A, de Lemos J, Powell-Wiley TM, Khera A, et al. Perceived Lifetime Risk for Cardiovascular Disease (From the Dallas Heart Study). *The American journal of cardiology*. 2014;114(1):53-8. doi: 10.1016/j.amjcard.2014.04.006
61. Kowall B, Rathmann W, Stang A, Bongaerts B, Kuss O, Herder C, Roden M, Quante A, Holle R, Huth C, Peters A, Meisinger C. Perceived risk of diabetes seriously underestimates actual diabetes risk: The KORA FF4 study. *PLoS One*. 2017 Jan 31;12(1):e0171152. doi: 10.1371/journal.pone.0171152.
62. Weinstein ND. Unrealistic optimism about susceptibility to health problems. *Journal of behavioral medicine*. 1982 Dec 1;5(4):441-60.
63. Kreuter MW, Strecher VJ. Changing inaccurate perceptions of health risk: results from a randomized trial. *Health psychology*. 1995 Jan;14(1):56.
64. Tsisis P, Bains J. Management of complex chronic disease: facing the challenges in the Canadian health-care system. *Health Serv Manage Res* 2008;21:228-35.
65. Kuluski K, Gill A, Naganathan G, Upshur R, Jaakkimainen RL, Wodchis WP. A qualitative descriptive study on the alignment of care goals between older persons with multi-morbidities, their family physicians and informal caregivers. *BMC Family Practice*. 2013 Dec;14(1):133.
66. The NHS Long Term Plan, January 2019. <https://www.longtermplan.nhs.uk/wp-content/uploads/2019/01/nhs-long-term-plan.pdf>
67. Jonas BS, Mussolino ME. Symptoms of depression as a prospective risk factor for stroke. *Psychosomatic medicine* 2000;62:463-471.
68. McKeivitt C, Fudge N, Redfern J, Sheldenkar A, Crichton S, Rudd AR, Forster A, Young J, Nazareth I, Silver LE, Rothwell PM. Self-reported long-term needs after stroke. *Stroke*. 2011 May;42(5):1398-403.
69. Kenkel D, Terza JV. The effect of physician advice on alcohol consumption: count regression with an endogenous treatment effect. *J. App. Econom*. 2001;16:165-184.
70. Zolnierok KBH, DiMatteo MR. Physician communication and patient adherence to treatment: a meta-analysis. *Medical Care*, 2009;47(8):826.
71. Breslin M, Mullan RJ, Montori VM. The design of a decision aid about diabetes medications for use during the consultation with patients with type 2 diabetes. *Patient Education and Counseling*, 2008;73(3):465-472.
72. Joseph-Williams N, Lloyd A, Edwards A, Stobbart L, Tomson D, Macphail S, Dodd C, Brain K, Elwyn G, Thomson R. Implementing shared decision making in the NHS: lessons from the MAGIC programme. *Bmj*. 2017 Apr 18;357:j1744.



- 1  
2  
3 73. Stokes K, Barker R, Pigott R. Which doctors take up promising ideas? New insights from open data.  
4 *Nesta*. 2014.  
5  
6 74. Porat T, Delaney B, Kostopoulou O. The impact of a diagnostic decision support system on the  
7 consultation: perceptions of GPs and patients. *BMC Medical Informatics and Decision Making*,  
8 2017;17(1):79.  
9  
10  
11  
12  
13  
14  
15  
16  
17

## Figure captions

18  
19 **Figure 1: A diagrammatic summary of the development and evaluation of DOTT, including the data that**  
20 **fed the different stages and the outputs.** SEM = Stakeholder Engagement Meeting (consisting 3 focus  
21 groups); FG = Focus group; SH=Stakeholders; IPDAS = International Patient Decision Aids Standards<sup>23</sup>;  
22 SDM model = Shared decision making model for clinical practice<sup>32</sup>; SRPFG = Stroke Research Patient and  
23 Family Group<sup>31</sup>  
24

25 **Figure 2: An example screen from DOTT prototype displaying the stroke survivor's predicted stroke risk**  
26 **before and after a selected treatment (e.g., control of blood pressure).**  
27  
28  
29  
30  
31  
32  
33  
34  
35  
36  
37  
38  
39  
40  
41  
42  
43  
44  
45  
46  
47  
48  
49  
50  
51  
52  
53  
54  
55  
56  
57  
58  
59  
60

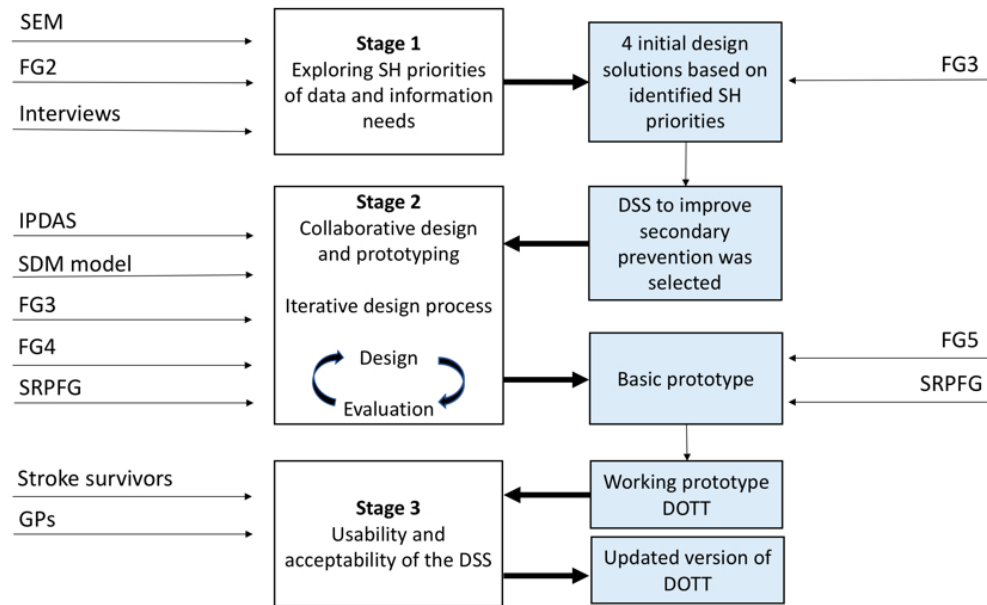

Figure 1: A diagrammatic summary of the development and evaluation of DOTT, including the data that fed the different stages and the outputs. SEM = Stakeholder Engagement Meeting (consisting 3 focus groups); FG = Focus group; SH=Stakeholders; IPDAS = International Patient Decision Aids Standards<sup>23</sup>; SDM model = Shared decision making model for clinical practice<sup>32</sup>; SRPFG = Stroke Research Patient and Family Group<sup>31</sup>

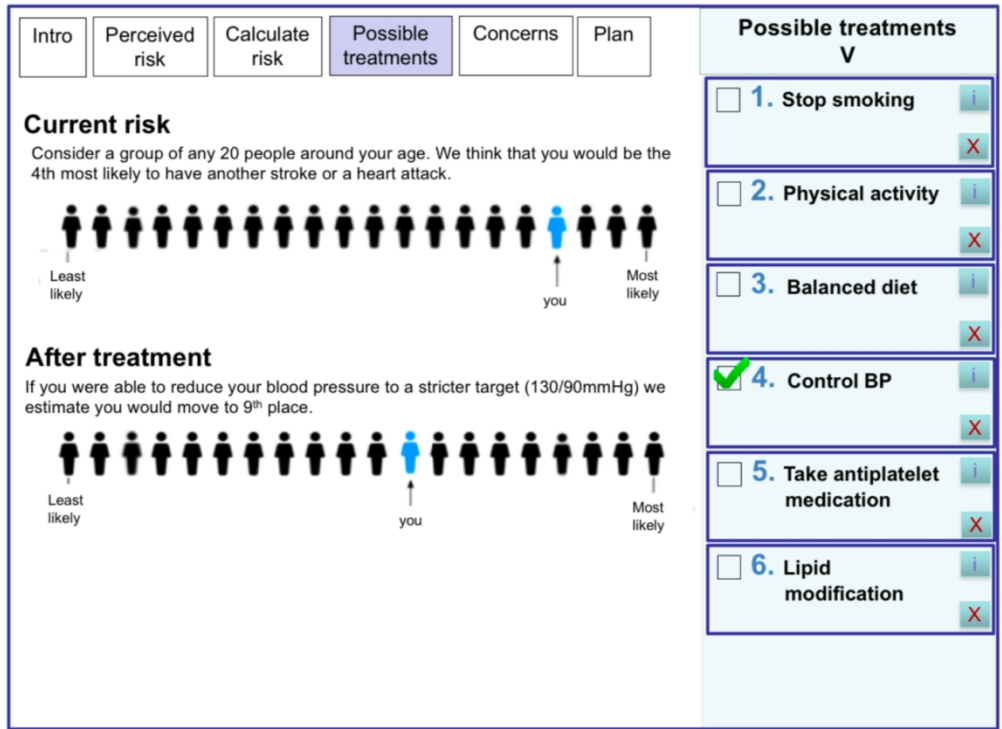

Figure 2: An example screen from DOTT prototype displaying the stroke survivor’s predicted stroke risk before and after a selected treatment (e.g., control of blood pressure).

1  
2  
3 **Box 1: Topic guide for the separate focus groups in the SEM**  
4

5 In a large group, explain:

- 6
- 7 • Study aim
  - 8 • What a LHS is, and how a LHS might work in general practice
  - 9 • The co-production approach we are using
- 10

11 In separate focus groups:

- 12
- 13 • Ask participants to provide examples of information which are/would be useful for
  - 14 patients/carers/clinicians/health commissioners?
  - 15 • Previous experiences of information delivery: What worked well? What worked badly/not so
  - 16 well?
- 17

18 Explore stakeholders' understandings around what is data linkage, and what is a learning health

19 system (LHS)?

- 20
- 21 • How would a LHS work in practice for stroke?
  - 22 • Any ethical concerns about this process (particularly regarding data linkage)? How can these be
  - 23 addressed?
  - 24 • What types of information could be generated using this method?
  - 25 • How broadly might they be delivered?
- 26

27 Discuss ideas for new information interventions

- 28
- 29 • Feedback from individual groups
- 30

31 Develop as a larger group a priority list for key priorities for data and information needs.

32

33 Note: Since a few healthcare professionals could not attend the focus groups, we conducted face-to-

34 face interviews with them using the same topic guide.

35

36

37

38

39

40

41

42

43

44

45

46

47

48

49

50

51

52

53

54

55

56

57

58

59

60

1  
2  
3  
4 Box 2: post-usability interview - patients

- 5  
6  
7  
8  
9  
10  
11  
12  
13  
14  
15  
16  
17  
18  
19  
20  
21  
22  
23  
24  
25  
26  
27  
28  
29  
30  
31  
32  
33  
34  
35  
36  
37  
38  
39  
40  
41  
42  
43  
44  
45  
46  
47  
48
- Do you have any comments about today's session? Feel free to comment on anything you want.
  - How did it feel having a consultation using the decision aid?
  - Who do you think should be involved in making decisions about how acceptable your risks are of having a further stroke?
    - your doctor alone
    - mostly your doctor
    - your doctor and you equally
    - mostly you
    - you alone
  - Who do you think should be involved in making decisions about ways to reduce your risk of stroke?
    - your doctor alone
    - mostly your doctor
    - your doctor and you equally
    - mostly you
    - you alone
  - To what extent do you agree with the following statement? (from 1 strongly disagree to 5 strongly agree)
    - The decision aid will help patients with adopting healthier behaviours, such as changing Lifestyle habits and/or taking medication according to the management plan they agreed on.
    - Having seen how the decision aid works, patients will likely look for more information about stroke and its risk factors.
  - (if agreed on statement above) Can you please describe how the decision aid might support patients in changing some of their health-related habits?
  - What might make it difficult (barriers, hurdles) for patients to change some of their health-related habits?
  - Would you find the decision aid helpful for your own health-related habits?
  - What do you like about the decision aid?
  - What don't you like about the decision aid?
  - What suggestions do you have to improve the decision aid?

49 Give Acceptability and Usability questionnaires.  
50  
51  
52  
53  
54  
55  
56  
57  
58  
59  
60

# Reporting checklist for qualitative study.

Based on the SRQR guidelines.

## Instructions to authors

Complete this checklist by entering the page numbers from your manuscript where readers will find each of the items listed below.

Your article may not currently address all the items on the checklist. Please modify your text to include the missing information. If you are certain that an item does not apply, please write "n/a" and provide a short explanation.

Upload your completed checklist as an extra file when you submit to a journal.

In your methods section, say that you used the SRQR reporting guidelines, and cite them as:

O'Brien BC, Harris IB, Beckman TJ, Reed DA, Cook DA. Standards for reporting qualitative research: a synthesis of recommendations. *Acad Med.* 2014;89(9):1245-1251.

|                                            | Reporting Item                                                                                                                                                                                                                                 | Page Number |
|--------------------------------------------|------------------------------------------------------------------------------------------------------------------------------------------------------------------------------------------------------------------------------------------------|-------------|
|                                            | #1 Concise description of the nature and topic of the study identifying the study as qualitative or indicating the approach (e.g. ethnography, grounded theory) or data collection methods (e.g. interview, focus group) is recommended        | 1           |
|                                            | #2 Summary of the key elements of the study using the abstract format of the intended publication; typically includes background, purpose, methods, results and conclusions                                                                    | 2           |
| Problem formulation                        | #3 Description and significance of the problem / phenomenon studied: review of relevant theory and empirical work; problem statement                                                                                                           | 3           |
| Purpose or research question               | #4 Purpose of the study and specific objectives or questions                                                                                                                                                                                   | 4           |
| Qualitative approach and research paradigm | #5 Qualitative approach (e.g. ethnography, grounded theory, case study, phenomenology, narrative research) and guiding theory if appropriate; identifying the research paradigm (e.g. postpositivist, constructivist / interpretivist) is also | 4,5         |

recommended; rationale. The rationale should briefly discuss the justification for choosing that theory, approach, method or technique rather than other options available; the assumptions and limitations implicit in those choices and how those choices influence study conclusions and transferability. As appropriate the rationale for several items might be discussed together.

|    |                            |                                                                    |       |
|----|----------------------------|--------------------------------------------------------------------|-------|
| 1  |                            |                                                                    |       |
| 2  |                            |                                                                    |       |
| 3  |                            |                                                                    |       |
| 4  |                            |                                                                    |       |
| 5  |                            |                                                                    |       |
| 6  |                            |                                                                    |       |
| 7  |                            |                                                                    |       |
| 8  |                            |                                                                    |       |
| 9  |                            |                                                                    |       |
| 10 | Researcher characteristics | #6                                                                 | 7     |
| 11 | and reflexivity            | Researchers' characteristics that may influence the research,      |       |
| 12 |                            | including personal attributes, qualifications / experience,        |       |
| 13 |                            | relationship with participants, assumptions and / or               |       |
| 14 |                            | presuppositions; potential or actual interaction between           |       |
| 15 |                            | researchers' characteristics and the research questions,           |       |
| 16 |                            | approach, methods, results and / or transferability                |       |
| 17 |                            |                                                                    |       |
| 18 |                            |                                                                    |       |
| 19 |                            |                                                                    |       |
| 20 | Context                    | #7                                                                 | 4,5   |
| 21 |                            | Setting / site and salient contextual factors; rationale           |       |
| 22 | Sampling strategy          | #8                                                                 | 5     |
| 23 |                            | How and why research participants, documents, or events were       |       |
| 24 |                            | selected; criteria for deciding when no further sampling was       |       |
| 25 |                            | necessary (e.g. sampling saturation); rationale                    |       |
| 26 |                            |                                                                    |       |
| 27 | Ethical issues pertaining  | #9                                                                 | 5, 17 |
| 28 | to human subjects          | Documentation of approval by an appropriate ethics review          |       |
| 29 |                            | board and participant consent, or explanation for lack thereof;    |       |
| 30 |                            | other confidentiality and data security issues                     |       |
| 31 |                            |                                                                    |       |
| 32 |                            |                                                                    |       |
| 33 | Data collection methods    | #10                                                                | 5,6   |
| 34 |                            | Types of data collected; details of data collection procedures     |       |
| 35 |                            | including (as appropriate) start and stop dates of data collection |       |
| 36 |                            | and analysis, iterative process, triangulation of sources /        |       |
| 37 |                            | methods, and modification of procedures in response to             |       |
| 38 |                            | evolving study findings; rationale                                 |       |
| 39 |                            |                                                                    |       |
| 40 |                            |                                                                    |       |
| 41 | Data collection            | #11                                                                | 4,5,6 |
| 42 | instruments and            | Description of instruments (e.g. interview guides,                 |       |
| 43 | technologies               | questionnaires) and devices (e.g. audio recorders) used for data   |       |
| 44 |                            | collection; if / how the instruments(s) changed over the course    |       |
| 45 |                            | of the study                                                       |       |
| 46 |                            |                                                                    |       |
| 47 |                            |                                                                    |       |
| 48 | Units of study             | #12                                                                | 5,6,7 |
| 49 |                            | Number and relevant characteristics of participants, documents,    |       |
| 50 |                            | or events included in the study; level of participation (could be  |       |
| 51 |                            | reported in results)                                               |       |
| 52 |                            |                                                                    |       |
| 53 | Data processing            | #13                                                                | 6     |
| 54 |                            | Methods for processing data prior to and during analysis,          |       |
| 55 |                            | including transcription, data entry, data management and           |       |
| 56 |                            | security, verification of data integrity, data coding, and         |       |
| 57 |                            | anonymisation / deidentification of excerpts                       |       |
| 58 |                            |                                                                    |       |
| 59 |                            |                                                                    |       |
| 60 |                            |                                                                    |       |



|    |                                                                                              |     |                                                                                                                                                                                                                                                                                                          |            |
|----|----------------------------------------------------------------------------------------------|-----|----------------------------------------------------------------------------------------------------------------------------------------------------------------------------------------------------------------------------------------------------------------------------------------------------------|------------|
| 1  | Data analysis                                                                                | #14 | Process by which inferences, themes, etc. were identified and developed, including the researchers involved in data analysis; usually references a specific paradigm or approach; rationale                                                                                                              | 7          |
| 2  |                                                                                              |     |                                                                                                                                                                                                                                                                                                          |            |
| 3  |                                                                                              |     |                                                                                                                                                                                                                                                                                                          |            |
| 4  |                                                                                              |     |                                                                                                                                                                                                                                                                                                          |            |
| 5  |                                                                                              |     |                                                                                                                                                                                                                                                                                                          |            |
| 6  | Techniques to enhance trustworthiness                                                        | #15 | Techniques to enhance trustworthiness and credibility of data analysis (e.g. member checking, audit trail, triangulation); rationale                                                                                                                                                                     | 7          |
| 7  |                                                                                              |     |                                                                                                                                                                                                                                                                                                          |            |
| 8  |                                                                                              |     |                                                                                                                                                                                                                                                                                                          |            |
| 9  |                                                                                              |     |                                                                                                                                                                                                                                                                                                          |            |
| 10 |                                                                                              |     |                                                                                                                                                                                                                                                                                                          |            |
| 11 | Syntheses and interpretation                                                                 | #16 | Main findings (e.g. interpretations, inferences, and themes); might include development of a theory or model, or integration with prior research or theory                                                                                                                                               | 7-10,11-13 |
| 12 |                                                                                              |     |                                                                                                                                                                                                                                                                                                          |            |
| 13 |                                                                                              |     |                                                                                                                                                                                                                                                                                                          |            |
| 14 |                                                                                              |     |                                                                                                                                                                                                                                                                                                          |            |
| 15 |                                                                                              |     |                                                                                                                                                                                                                                                                                                          |            |
| 16 |                                                                                              |     |                                                                                                                                                                                                                                                                                                          |            |
| 17 | Links to empirical data                                                                      | #17 | Evidence (e.g. quotes, field notes, text excerpts, photographs) to substantiate analytic findings                                                                                                                                                                                                        | 6-9,12-14  |
| 18 |                                                                                              |     |                                                                                                                                                                                                                                                                                                          |            |
| 19 |                                                                                              |     |                                                                                                                                                                                                                                                                                                          |            |
| 20 |                                                                                              |     |                                                                                                                                                                                                                                                                                                          |            |
| 21 | Intergration with prior work, implications, transferability and contribution(s) to the field | #18 | Short summary of main findings; explanation of how findings and conclusions connect to, support, elaborate on, or challenge conclusions of earlier scholarship; discussion of scope of application / generalizability; identification of unique contributions(s) to scholarship in a discipline or field | 14-15      |
| 22 |                                                                                              |     |                                                                                                                                                                                                                                                                                                          |            |
| 23 |                                                                                              |     |                                                                                                                                                                                                                                                                                                          |            |
| 24 |                                                                                              |     |                                                                                                                                                                                                                                                                                                          |            |
| 25 |                                                                                              |     |                                                                                                                                                                                                                                                                                                          |            |
| 26 |                                                                                              |     |                                                                                                                                                                                                                                                                                                          |            |
| 27 |                                                                                              |     |                                                                                                                                                                                                                                                                                                          |            |
| 28 |                                                                                              |     |                                                                                                                                                                                                                                                                                                          |            |
| 29 | Limitations                                                                                  | #19 | Trustworthiness and limitations of findings                                                                                                                                                                                                                                                              | 15,16      |
| 30 |                                                                                              |     |                                                                                                                                                                                                                                                                                                          |            |
| 31 | Conflicts of interest                                                                        | #20 | Potential sources of influence of perceived influence on study conduct and conclusions; how these were managed                                                                                                                                                                                           | 17         |
| 32 |                                                                                              |     |                                                                                                                                                                                                                                                                                                          |            |
| 33 |                                                                                              |     |                                                                                                                                                                                                                                                                                                          |            |
| 34 |                                                                                              |     |                                                                                                                                                                                                                                                                                                          |            |
| 35 | Funding                                                                                      | #21 | Sources of funding and other support; role of funders in data collection, interpretation and reporting                                                                                                                                                                                                   | 17         |
| 36 |                                                                                              |     |                                                                                                                                                                                                                                                                                                          |            |
| 37 |                                                                                              |     |                                                                                                                                                                                                                                                                                                          |            |
| 38 |                                                                                              |     |                                                                                                                                                                                                                                                                                                          |            |

39 The SRQR checklist is distributed with permission of Wolters Kluwer © 2014 by the Association of American  
 40 Medical Colleges. This checklist was completed on 07. March 2019 using <https://www.goodreports.org/>, a tool  
 41 made by the [EQUATOR Network](#) in collaboration with [Penelope.ai](#)  
 42  
 43  
 44  
 45  
 46  
 47  
 48  
 49  
 50  
 51  
 52  
 53  
 54  
 55  
 56  
 57  
 58  
 59  
 60

# BMJ Open

## Collaborative design of a decision aid for stroke survivors with multimorbidity: a qualitative study in the UK engaging key stakeholders

|                                 |                                                                                                                                                                                                                                                                                                                                                                                                                                                                                   |
|---------------------------------|-----------------------------------------------------------------------------------------------------------------------------------------------------------------------------------------------------------------------------------------------------------------------------------------------------------------------------------------------------------------------------------------------------------------------------------------------------------------------------------|
| Journal:                        | <i>BMJ Open</i>                                                                                                                                                                                                                                                                                                                                                                                                                                                                   |
| Manuscript ID                   | bmjopen-2019-030385.R2                                                                                                                                                                                                                                                                                                                                                                                                                                                            |
| Article Type:                   | Research                                                                                                                                                                                                                                                                                                                                                                                                                                                                          |
| Date Submitted by the Author:   | 27-Jun-2019                                                                                                                                                                                                                                                                                                                                                                                                                                                                       |
| Complete List of Authors:       | Porat, Talya; Imperial College London, Dyson School of Design Engineering<br>Marshall, Iain; King's College London,<br>Sadler, Euan; Kings College London, Department of Primary Care and Public Health Sciences<br>Vadillo, Miguel<br>McKevitt, Christopher; King's College London, Department of Public Health Sciences<br>Wolfe, Charles; Kings College London, Health and Social Care Research<br>Curcin, Vasa; Kings College London, Primary Care and Public Health Sciences |
| <b>Primary Subject Heading</b>: | Patient-centred medicine                                                                                                                                                                                                                                                                                                                                                                                                                                                          |
| Secondary Subject Heading:      | Cardiovascular medicine, Health informatics, Qualitative research                                                                                                                                                                                                                                                                                                                                                                                                                 |
| Keywords:                       | STROKE MEDICINE, PRIMARY CARE, Learning Health System, Shared Decision Making, Decision Support System, Stakeholder Engagment                                                                                                                                                                                                                                                                                                                                                     |
|                                 |                                                                                                                                                                                                                                                                                                                                                                                                                                                                                   |

SCHOLARONE™  
Manuscripts

1  
2  
3  
4  
5  
6  
7  
8  
9  
10  
11  
12  
13  
14  
15  
16  
17  
18  
19  
20  
21  
22  
23  
24  
25  
26  
27  
28  
29  
30  
31  
32  
33  
34  
35  
36  
37  
38  
39  
40  
41  
42  
43  
44  
45  
46  
47  
48  
49  
50  
51  
52  
53  
54  
55  
56  
57  
58  
59  
60

## Collaborative design of a decision aid for stroke survivors with multimorbidity: a qualitative study in the UK engaging key stakeholders

Talya Porat<sup>\*1,2,3</sup>, Iain Marshall<sup>2,3</sup>, Euan Sadler<sup>4,5</sup>, Miguel A. Vadillo<sup>2,6</sup>, Christopher McKeivitt<sup>2,3,7</sup>, Charles D A Wolfe<sup>2,3,7</sup>, Vasa Curcin<sup>2,3,7</sup>

<sup>1</sup> Dyson School of Design Engineering, Faculty of Engineering, Imperial College London, London, UK

<sup>2</sup> School of Population Health and Environmental Sciences, Faculty of Life Sciences and Medicine, King's College London, London, UK

<sup>3</sup> National Institute for Health Research (NIHR) Collaboration for Leadership in Applied Health Research and Care South London, London, UK

<sup>4</sup> School of Health Sciences, Faculty of Environmental and Life Sciences, University of Southampton, UK

<sup>5</sup> Health Service and Population Research Department, King's Improvement Science, Centre for Implementation Science, Institute of Psychiatry, Psychology and Neuroscience, King's College London, London, UK

<sup>6</sup> Departamento de Psicología Básica, Universidad Autónoma de Madrid, Madrid, Spain

<sup>7</sup> National Institute for Health Research (NIHR) Biomedical Research Centre at Guy's and St Thomas' NHS Foundation Trust and King's College London, Tower Wing Guy's Hospital, London, UK.

### \*Corresponding author:

Dr Talya Porat  
Imperial College London  
Dyson School of Design Engineering  
Imperial College Road  
South Kensington  
London, SW7 2DB  
Tel: +44 (0)20 7594 7381  
[t.porat@imperial.ac.uk](mailto:t.porat@imperial.ac.uk)

## ABSTRACT

**Objectives:** Effective secondary stroke prevention strategies are sub-optimally used. Novel development of interventions to enable healthcare professionals and stroke survivors to manage risk factors for stroke recurrence are required. We sought to engage key stakeholders in the design and evaluation of an intervention informed by a Learning Health System approach, to improve risk factor management and secondary prevention for stroke survivors with multimorbidity.

**Design:** Qualitative, including focus groups, semi-structured interviews and usability evaluations. Data was audio-recorded, transcribed and coded thematically.

**Participants:** Stroke survivors, carers, health and social care professionals, commissioners, policy makers and researchers.

**Setting:** Stroke survivors were recruited from the South London Stroke Register; health and social care professionals through South London general practices and King's College London (KCL) networks; carers, commissioners, policy-makers and researchers through KCL networks.

**Results:** 53 stakeholders in total participated in focus groups, interviews and usability evaluations. Thirty-seven participated in focus groups and interviews, including stroke survivors and carers (N=11), health and social care professionals (N=16), commissioners and policy-makers (N=6) and researchers (N=4). Sixteen participated in usability evaluations, including stroke survivors (N=8) and general practitioners (GPs; N=8). Eight themes informed the collaborative design of DOTT (Deciding on Treatments Together), a decision aid integrated with the electronic health record system, to be used in primary care during clinical consultations between the healthcare professional and stroke survivor. DOTT aims to facilitate shared decision making on personalised treatments leading to improved treatment adherence and risk control. DOTT was found acceptable and usable among stroke survivors and GPs during a series of evaluations.

**Conclusions:** Adopting a user-centred data-driven design approach informed an intervention that is acceptable to users and has the potential to improve patient outcomes. A future feasibility study and subsequent clinical trial will provide evidence of the effectiveness of DOTT in reducing risk of stroke recurrence.

## STRENGTHS AND LIMITATIONS OF THIS STUDY

- Engaging a range of stakeholders in the design and evaluation of an intervention ensures that the intervention is in line with the needs reported by the different stakeholders (e.g., stroke survivors, healthcare professionals, policy makers).
- Adopting a Learning Health System approach enables the delivery of personalised recommendations in real time whilst simultaneously capturing additional data back into the system, to improve the system's predictive model and recommendations.
- As only stroke survivors able to attend the focus groups participated in the study, we did not elicit the views of stroke survivors who are less mobile or housebound.

## INTRODUCTION

Stroke is the second leading cause of death and a major cause of disability worldwide.<sup>1</sup> In 2015, there were 3.7 million people living with stroke as a chronic condition in Europe and this number is expected to reach 4.6 million in 2035.<sup>2</sup> Stroke survivors have a nearly 40% cumulative risk of recurrence during the first 10 years after stroke.<sup>3</sup> Secondary stroke prevention requires healthcare professionals to offer effective interventions to monitor and manage risk factors, and for patients to change health related behaviours (e.g., smoking)<sup>4</sup> and adhere to preventative medications (e.g., to control hypertension).<sup>5</sup> Follow-up appointments with clinicians offer opportunities to discuss interventions for reducing the risk of future stroke. However, long-term stroke care is characterised by a lack of continuity<sup>6</sup> and modifiable risk factors are currently not well detected, managed or controlled post stroke.<sup>7</sup>

Interventions designed to improve risk-factor management among stroke survivors in randomised controlled trials (RCTs) have shown modest or no effect. A recent Cochrane systematic review of 42 RCTs evaluating the effectiveness of educational and behavioural or organisational interventions on modifiable risk factor control for secondary prevention of stroke, found no clear benefit in any of the target outcomes (i.e., blood pressure, lipid profile, HbA1c, BMI and recurrent cardiovascular events).<sup>8</sup> Possible reasons could be that these interventions have not been part of the clinical decision-making process of clinicians, did not engage various stakeholders in the design of the intervention, and were not integrated with the Electronic Health Record (EHR) (with the exception of one study<sup>9</sup>) - all of which are considered critical features of successful clinical decision support systems.<sup>10,11</sup>

Stroke survivors commonly experience multimorbidity.<sup>12</sup> Gallacher and colleagues found that 94% of the people with stroke had one or more additional morbidities and often experienced long-term physical, psychological and social consequences.<sup>12</sup> This makes improving long-term stroke care a complex endeavour, requiring patient engagement, high quality up-to-date information and a holistic approach which focuses on the patient and not on the disease.<sup>13</sup> These aspects are important both to plan effective treatments for individual patients and guide best practice for the stroke population in general.<sup>14</sup>

The Learning Health System (LHS) 'focusses on approaches to capture data from clinical encounters and other health-related events, analyse the data to generate new knowledge, and then apply this knowledge to continuously inform and improve health decision making and practice.'<sup>15(p.177)</sup> In a recent report (2019) stating what the NHS can learn from the LHS, the authors argue that it is necessary to utilise data to transform services, not just to digitise current ways of working.<sup>16</sup> Thus, LHS outputs can provide tailored information on optimal care decisions and be delivered at the point of clinical care.<sup>17</sup>

Decision support systems (DSS) which aim to analyse a patient's characteristics to provide tailored recommendations (such as for diagnosis,<sup>18</sup> treatment or long-term management), implement this transfer of evidence into practice. This is done particularly when used in conjunction with sources of 'Real World Data'<sup>19</sup> such as EHR systems that capture detailed data on specific conditions. Such point-of-care DSS support a range of applications, including identifying patient risk estimation, providing guidance on the appropriateness of treatments, and tailoring clinical information to specific patient needs - providing the right care to the right patient at the right time.<sup>17</sup> A few studies have reported that engaging stakeholders to develop a LHS and integrated DSS improved patient outcomes and processes of care for individuals with long-term conditions.<sup>20,21</sup>

1  
2  
3 Increasingly patients are expecting to be informed and involved in their care.<sup>22</sup> This shift from  
4 imposition of professional opinion towards a more collaborative model of care is not only relevant  
5 when people face difficult decisions about their health, where there are high stakes and where  
6 outcomes are uncertain, but also in situations where people need to manage long term conditions or  
7 consider making changes in their lifestyles in order to reduce future risks.<sup>23</sup> Such shared decision  
8 making (SDM) respects patient values and preferences, and supports decision-making through the  
9 provision of high-quality, accessible information.<sup>24</sup> SDM has been found to be most effective if  
10 interventions are developed for use during the clinical encounter,<sup>25</sup> and several DSS that have been  
11 designed to facilitate SDM during the consultation (i.e., decision aids) have shown improved treatment  
12 adherence and clinical outcomes in patients with chronic conditions such as asthma and diabetes.<sup>26,27</sup>

13  
14  
15  
16  
17 In his seminal analysis, Berg criticised the 'top-down' technology centred approach to designing  
18 decision support systems.<sup>28</sup> He described an alternative *socio-technical* approach, where new tools  
19 needed to be designed taking into account the real-world complex networks of people involved in  
20 health care, and designed using an iterative approach which makes strong use of qualitative research  
21 with users.

## 22 23 24 25 **Aims and objectives**

26 The aim of this study was to engage key stakeholders to identify priorities and information needs in  
27 long term stroke care and collaboratively design and evaluate a selected intervention that could be  
28 integrated as part of the EHR system informed by a LHS approach. The data supporting the selected  
29 intervention are based on linked datasets from the South London Stroke Register (SLSR),<sup>29</sup> which  
30 includes more than 6,000 records of first-ever strokes that occur in South London, and Lambeth  
31 Datanet (LDN)<sup>30</sup> containing primary care data of local general practices in South London.

## 32 33 34 35 **METHOD**

### 36 37 38 **Patient and public involvement**

39 The design was informed by active feedback from stroke survivors and carers from King's College  
40 London's Stroke Research Patient and Family Group (SRPFG)<sup>31</sup>, a service user research group which  
41 consists of 32 participants currently on the SLSR who are from diverse socio-economic and ethnic  
42 backgrounds. Stroke survivors, carers, health and social care professionals, commissioners, policy  
43 makers and researchers were involved throughout the study in a collaborative design and evaluation  
44 process.

### 45 46 47 48 **Data collection**

49 We used a range of methods to engage stakeholders (N=53) in the design and evaluation of the  
50 intervention, including focus groups, face to face interviews and usability evaluations (see topic guides  
51 and interview questions in the supplementary files). The process involved three main stages: (1)  
52 exploring stakeholder priorities for data and information needs to inform potential solutions for long-  
53 term stroke care; (2) collaborative design of the selected intervention with stakeholders, comprising  
54 cycles of design, prototyping and evaluation; (3) Usability and acceptability evaluation of the DSS  
55 prototype (See Figure 1). Thirty-seven stakeholders participated in the first two stages, including  
56 stroke survivors and carers (N=11), health and social care professionals (N=16), commissioners and  
57 policy makers (N=6) and researchers (N=4). Sixteen stakeholders participated in the third stage,  
58  
59  
60

1  
2  
3 including 8 stroke survivors and 8 General practitioners (GPs). Stroke survivors were recruited from  
4 the SLSR. Health and social care professionals were recruited through general practices in South  
5 London and King's College London networks. Carers, commissioners, policy makers and researchers  
6 were also recruited through these networks. Stakeholders were purposively sampled to include stroke  
7 survivors (i.e. men and women, with a range of disabilities and long-term conditions, risk factors and  
8 length of time since their stroke) and professionals providing all types of stroke care and support. See  
9 Table 1 for details of all stakeholders taking part in the study. Participants could take part in the study  
10 if they were able to attend the meetings and were willing to sign a consent form. Transport was  
11 arranged for less mobile patients.  
12  
13  
14

15 <Insert Figure 1 here>  
16

### 17 **Stage 1: Exploring stakeholder priorities for data and information needs**

18 In total, 37 stakeholders participated in this stage. An initial stakeholder engagement meeting  
19 comprising 24 participants (SEM), 9 face to face interviews with key stakeholders who could not  
20 attend this meeting, and a second focus group involving 12 participants (FG2) were conducted (some  
21 participants took part on multiple occasions). The methods and findings from this stage of the study  
22 have been reported elsewhere.<sup>14</sup> In brief, in the initial engagement meeting (SEM), participants were  
23 introduced to the concept of a LHS and then in three separate focus groups (service user/carer; health  
24 and social care professionals; commissioners and policy makers) they were asked to identify priorities  
25 and potential solutions that may be derived from the clinical data to improve long-term stroke care  
26 for stroke survivors with multimorbidity. Then, in the larger group, through a process of priority setting  
27 and consensus led by a facilitator (ES), stakeholders identified a number of priorities and solutions to  
28 improve long-term management of stroke (i.e. improving continuity of care; improving management  
29 of mental health consequences; better access to health and social care; and targeting multiple risk  
30 factors). Targeting multiple risk factors after stroke was identified among stakeholders as a key  
31 priority, and a DSS to improve secondary prevention after stroke to target multiple risk factors was  
32 subsequently chosen within a smaller core stakeholder group (FG3) for further development. This core  
33 stakeholder group (N=12) comprised stroke survivors, healthcare professionals, carer, policy maker  
34 and commissioner, and worked collaboratively with the research team to subsequently design the  
35 intervention and to provide their active feedback.  
36  
37  
38  
39  
40  
41  
42  
43

### 44 **Stage 2: Collaborative design and prototyping of selected intervention**

45 The initial design of the DSS to improve secondary stroke prevention and target multiple risk factors  
46 after stroke was informed by the first stage and guided by the International Patient Decision Aids  
47 Standards (IPDAS),<sup>23</sup> which provides a framework and standards for the design of patient decision aids,  
48 and the SDM model for clinical practice.<sup>32</sup> The latter provides a model of how to conduct shared  
49 decision making in practice based on providing patients choice, a range of options and involving them  
50 in 'decision talk'. Following feedback from the core stakeholder group at the third focus group meeting  
51 above (N=10) (FG3), an updated design of the intervention was subsequently reviewed by the core  
52 stakeholder group at a fourth focus group (N=9) (FG4) and was revised following their feedback. The  
53 DSS was also presented to the King's College London's SRPFG. The intervention was revised and the  
54 updated design was developed as a basic prototype and was further discussed during a subsequent  
55 focus group with the core stakeholder group (N=9) (FG5) and the SRPFG. This process allowed all  
56 stakeholders to iteratively develop and refine the DSS to a working prototype.  
57  
58  
59  
60



### Stage 3: Usability and acceptability evaluation of the DSS

Sixteen participants, including eight stroke survivors and eight GPs participated in the usability and acceptability evaluation of the working prototype of the DSS. None had taken part in the previous stages of the study.

The evaluation included simulated consultations using the DSS prototype. In the GPs session, the researcher acted as the patient, and in the stroke patient's session, the researcher acted as the GP. GPs were given a short tutorial on how to use the DSS before the simulated consultations and stroke survivors were given a short explanation about the DSS. GPs and stroke survivors were interviewed after the simulated consultation, asking them to provide feedback on the DSS, including its strengths, limitations and suggestions for improvements. Stroke survivors and GPs also answered an acceptability questionnaire<sup>33</sup> and the System Usability Scale (SUS).<sup>34</sup> Acceptability relates to the comprehensibility of the components of the decision aid, including its length, pace, amount of information, balance in presentation and overall suitability.<sup>33</sup> Usability is 'the extent to which a product can be used by specified users to achieve specified goals with effectiveness, efficiency, and satisfaction in a specified context of use'.<sup>35</sup> The SUS is composed of 10 questions and has been shown to be a reliable and psychometrically validated tool.<sup>36</sup> Ratings were provided on 5-point Likert scales from 1 (strongly disagree) to 5 (strongly agree), with higher ratings indicating higher satisfaction.

For the usability evaluation, the DSS prototype had the following functionality and flow:

- Stroke survivors (patients) indicated their perceived risk of having a recurrent stroke.
- GPs entered the patient's characteristics (age, gender, clinical conditions).
- The system displayed a 'typical' recurrent stroke risk (age group specific average)<sup>37</sup> and the most effective treatments based on the patient's characteristics.
- The benefit of each treatment in terms of reducing the stroke risk was displayed. Estimated relative stroke risk reductions were calculated based on the existing literature.<sup>38-41</sup>
- Information and common concerns for each treatment were displayed.
- The GP and patient decided on a management plan whilst identifying desired clinical and patient outcomes.
- Patients were told that their management plan would be printed to take home.

**Table 1. Stakeholders taking part in the study**

| Type of stakeholder                            | SEM<br>(N=24) | Interviews<br>(N=9) | FG2<br>(N=12) | FG3<br>(N=10) | FG4<br>(N=9) | FG5<br>(N=9) | Usability<br>evaluation<br>(N=16) | Total<br>(N=53*) |
|------------------------------------------------|---------------|---------------------|---------------|---------------|--------------|--------------|-----------------------------------|------------------|
| <b>Stroke survivor</b>                         | <b>10</b>     |                     | <b>2</b>      | <b>2</b>      | <b>2</b>     | <b>2</b>     | <b>8</b>                          | <b>18</b>        |
| <b>Carer</b>                                   | <b>1</b>      |                     | <b>1</b>      | <b>1</b>      | <b>1</b>     | <b>1</b>     |                                   | <b>1</b>         |
| <b>Health and social care<br/>professional</b> | <b>8</b>      | <b>7</b>            | <b>3</b>      | <b>2</b>      | <b>2</b>     | <b>2</b>     | <b>8</b>                          | <b>22</b>        |
| GP                                             | 2             | 5                   | 1             | 1             | 1            | 1            | 8                                 | 13               |
| Physiotherapist                                | 2             |                     | 1             |               |              |              |                                   | 2                |
| Speech and language therapist                  | 1             |                     |               |               |              |              |                                   | 1                |
| Social care professional                       | 1             |                     |               |               |              |              |                                   | 1                |
| Public health doctor                           | 1             |                     |               |               |              |              |                                   | 1                |
| Consultant psychiatrist                        | 1             |                     |               |               |              |              |                                   | 1                |
| Occupational therapist                         |               |                     | 1             | 1             | 1            | 1            |                                   | 1                |
| Acute stroke care consultant                   |               | 2                   |               |               |              |              |                                   | 2                |
| <b>Policy makers and<br/>commissioners</b>     | <b>3</b>      | <b>2</b>            | <b>2</b>      | <b>2</b>      | <b>2</b>     | <b>2</b>     |                                   | <b>6</b>         |

|   |                                     |          |          |          |          |          |          |
|---|-------------------------------------|----------|----------|----------|----------|----------|----------|
| 1 |                                     |          |          |          |          |          |          |
| 2 |                                     |          |          |          |          |          |          |
| 3 | <b>Third sector representatives</b> | <b>2</b> |          |          |          |          | <b>2</b> |
| 4 | <b>Academic researchers</b> (social |          | <b>4</b> | <b>3</b> | <b>2</b> | <b>2</b> | <b>4</b> |
| 5 | scientist, researchers working      |          |          |          |          |          |          |
| 6 | with SLSR/LDN databases)            |          |          |          |          |          |          |
| 7 |                                     |          |          |          |          |          |          |

## Notes:

1. \*Overall 53 participants took part in the study, but a number of stakeholders took part on multiple occasions.
2. King's College London's Stroke Research Patient and Family Group (SRPFG) comprising 32 stroke survivors and carers also provided feedback on the design of the intervention in two of their meetings.

## Data Analysis

Data from focus groups and interviews were audio recorded, transcribed in full and stored in NVivo (Version 11). Qualitative data were analysed using a thematic analysis approach<sup>42</sup> to identify themes and sub-themes related to stakeholder perspectives informing the identification, design and evaluation of a DSS to improve secondary prevention for stroke survivors, which could be part of a LHS. This involved two authors (TP, ES) assigning codes and refining themes from the data, noting similarities and differences between stakeholder perspectives. The two authors have doctoral/post-doctoral experience in conducting and analysing qualitative data in applied health research.

## RESULTS

### Focus groups and interviews

Eight themes related to improving secondary prevention and management of multiple risk factors after stroke were identified from focus groups and interviews:

#### 1. Involve stroke survivors in decisions concerning their treatments

In the focus groups, stroke survivors often articulated that due to their multiple health conditions, and hence multiple risk factors for stroke recurrence, they would like to be more involved in selecting their treatments based on what is important to them and their desired outcomes. This viewpoint was further confirmed by stroke survivors participating in King's College London's SRPFG. A number of clinicians perceived that SDM did not take place on a regular basis during routine clinical consultations, and there was a need for greater involvement of stroke survivors and their carers in selecting treatments that best meet their needs and preferences. Commissioners and policy makers agreed that SDM is a necessity and noted that policies in the UK and other countries required the involvement of patients in their treatment decisions. They also emphasised the importance of data and evidence-based recommendations to improve decision making about treatments.

*"When I go to my doctor I realise it's my doctor who is making the decisions...but I think that patients now know often more about their own condition than the health professionals"*  
(stroke survivor, SEM)

*"This information (risk factors) which used to be something that I, as a doctor, only thought about, it's now something that we should think about together"* (GP, FG5)

*"How do we help patients and carers and health professionals together have a discussion using data information to make decisions about treatments?"* (commissioner, FG2)

#### 2. Present and communicate recurrent stroke risk in a meaningful way

Both stroke survivors and healthcare professionals (in the focus groups and interviews) emphasised the importance of displaying and communicating personalised stroke risk estimation in a clear and

1  
2  
3 meaningful way. Stroke survivors expressed that current risk presentations lacked clarity, with  
4 healthcare professionals agreeing with this idea, reporting that they also find it difficult to understand  
5 and communicate risk to patients whilst linking it to specific actions and behaviours among patients.  
6

7  
8 *“What is this individual’s risk of a further stroke in five years... and that’s really important*  
9 *because patients commonly ask us that ‘what is the risk of me having another stroke in the*  
10 *next year’ and we come up with a figure and we say ‘5% of whatever’” (hospital stroke*  
11 *physician, Interview)*

12  
13 *“And I think the other thing is what actually is risk, how do you convey that, I mean, is it twice*  
14 *as much risk if I’ve never had a stroke...I know exactly what you mean 50% and 5% of that are*  
15 *meaningless to most people” (stroke survivor, FG4)*

16  
17  
18 *“Because the patients often think that the GPs – or the doctors/the specialists understand risk.*  
19 *It’s really difficult to understand risk and we have to use guidelines to help us with risk. So if*  
20 *the guidelines say, ‘This is a risk and this is the level at which you should intervene’, then I’m*  
21 *not well enough informed to go any further than that” (GP, FG3)*

### 22 23 24 **3. Compare stroke survivor’s perceived stroke risk with their predicted risk**

25 In one of the focus groups, a carer voiced the importance of allowing stroke survivors to articulate  
26 their own perceived risk of having a recurrent stroke, which could then be compared with the actual  
27 predicted risk. Professionals and lay stakeholders in the group agreed that this would facilitate a  
28 collaborative discussion on potential risk factors and their impact on stroke risk.  
29

30  
31 *“Patients themselves if they’ve been through a process will likely at some point be shown*  
32 *something and said either mark yourself on this, because another thing is where do you think*  
33 *you are on this scale at the moment with your risks, sometimes that’s quite powerful” (carer,*  
34 *FG4)*

### 35 36 37 **4. Personalise treatments to help control multiple stroke risk factors**

38 Different stakeholders in a number of the focus groups and interviews emphasised the importance of  
39 controlling multiple risk factors for stroke recurrence in stroke survivors with multimorbidity and the  
40 need to develop effective treatments based specifically on the patient’s characteristics (e.g., age,  
41 ethnicity, health conditions). Stroke survivors from the SRPFG similarly voiced their preference to  
42 know their personal risk according to their personal characteristics and receive tailored advice from  
43 professionals about what specific actions they could perform to reduce the identified risks.  
44 Commissioners were interested in care pathways for stroke patients with multimorbidity and how  
45 these care pathways could be tailored to the patient’s characteristics.  
46  
47  
48

49  
50 *“Patients who’ve had a confirmed stroke, the first thing as a family physician in terms of*  
51 *management is to make sure that you’ve controlled all their risk factors to prevent them*  
52 *getting another stroke” (GP, Interview)*

53  
54 *“And if the system could provide him, like, tailored for the patient taking all the information*  
55 *and saying OK for this patient because he had stroke, he has diabetes and high blood pressure,*  
56 *we recommend the following care pathway, treatments” (commissioner, SEM)*

57  
58  
59 *“Anything that can be personalised or tailored, so you don’t feel it’s this off the shelf thing that*  
60

1  
2  
3                   *you're being given, you know... you sit with your doctor and it's not just a case of giving out a*  
4                   *leaflet, but actually let's have a look at your personal data" (occupational therapist, FG4)*  
5  
6

## 7   **5. Display effectiveness of recommended treatments in reducing stroke risk**

8   The majority of health and social care professionals, commissioners and policy makers perceived that  
9   stroke survivors with multimorbidity often have multiple risk factors to manage, and that prioritising  
10   the different treatments available for secondary prevention of these risk factors was required. Stroke  
11   survivors wanted to know the relative benefit of the proposed treatments being offered by clinicians  
12   in terms of how they addressed stroke risks and to take this information into account when deciding  
13   on personalised treatments. Commissioners specifically emphasised the importance of using  
14   evidence-based data to prioritise treatments to help patients in their decision making.  
15  
16

17                   *"...and you need to know, in fact, what the risk is if you do nothing compared with the risk if*  
18                   *you do something" (stroke survivor, FG3)*  
19  
20

21                   *"The question might be for a patient 'should I take a statin after a stroke' and we might be*  
22                   *able to use the database to answer the question 'what would be the risk of future stroke if I do*  
23                   *take a statin or if I don't take a statin' and you can use that information to help to come to a*  
24                   *decision together" (commissioner, SEM)*  
25  
26

27                   *"Well I suppose you could think about the common comorbidities, so hypertension and stroke,*  
28                   *AF (atrial fibrillation) and stroke, diabetes and stroke and you could think about not necessarily*  
29                   *an algorithm but a sort of stepwise prioritisation about what you should think about in terms*  
30                   *of the patient's total management, you know, which would be the most important area of*  
31                   *focus?" (GP, Interview)*  
32  
33

## 34   **6. Address stroke survivor concerns about treatment and barriers to adherence**

35   Stroke survivors in some of the focus groups and the members of the SRPFG raised concerns about  
36   the challenges of multiple treatments they were expected to adhere to in order to decrease the  
37   potential risks of a recurrent stroke, commonly reporting that they did not always understand the  
38   value of these treatments. Several felt that a joint discussion with a healthcare professional about  
39   these concerns would help them better understand the value of a particular treatment and reach an  
40   informed decision about it. When interviewed, several GPs agreed that it was very challenging for  
41   stroke survivors with multimorbidity to adhere to multiple medications and other treatments at any  
42   given time, and that it is sometimes difficult to identify among their various treatments what is  
43   absolutely necessary and what is 'good to have'.  
44  
45  
46

47                   *"My experience both with the doctors at the surgery and the consulting hospital is trying to*  
48                   *discuss the medication that they insisted I took. I had horrendous side-effects and I kept trying*  
49                   *to say to them 'Look, I'm having these side-effects, can I change, can I reduce, can I do blah*  
50                   *blah' and their attitude I have to say, is one of terrorising patients" (stroke survivor, SEM)*  
51  
52

53                   *"I think that's a common problem with all patients that suffer from comorbidities. It's*  
54                   *rationalising their medication and you know being able to take a holistic view of the person*  
55                   *and make sensible decisions about what they absolutely need to continue on and what they*  
56                   *don't. And you can only really do that just by having time with the patient, you know if it's*  
57                   *important for them to be able to sort of get up and get out and about and not feel dizzy, then*  
58                   *you may have to compromise on how much blood pressure medication they take" (GP,*  
59  
60

1  
2  
3 Interview)

## 4 5 6 **7. Support continuity of care**

7 Stroke survivors commonly reported that they do not have appointments with their GP or other  
8 healthcare professionals on a regular basis. Several felt that the idea of personalised care to control  
9 stroke risk factors is very important but should have a follow-up to ensure continuity of care, which  
10 was often lacking. Some also perceived that the selected treatments and management plan should be  
11 saved on the system for future consultations and a follow-up appointment always set in advance.  
12 Commissioners also emphasised the importance of follow-up appointments and raised the concern  
13 that although follow-up appointments are an important part of stroke management and are required  
14 according to the National Institute for Health and Care Excellence (NICE) guidelines, many stroke  
15 survivors do not have follow-up appointments and do not see a GP over the longer term.  
16  
17  
18

19 *“I’m just thinking of my practice where it’s very difficult to get to see the same doctor and if I*  
20 *was presented with my third in line (i.e. the risk graphic display) ten times from ten different*  
21 *doctors I’d be starting to get a bit hacked off I think” (stroke survivor, FG4)*  
22

23 *“It’s not a one time thing...there needs to be continuous interaction I think if something’s going*  
24 *to happen (stroke survivor, FG4).*  
25  
26

## 27 **8. Identify stroke survivors at high risk of recurrent stroke**

28 Healthcare professionals, commissioners and policy makers highlighted the need to proactively  
29 identify stroke survivors at high risk of having a recurrent stroke to assess and treat them in a timely  
30 manner. They felt that many stroke survivors, especially those with more severe long-term  
31 consequences from the stroke, do not often see a physician, and it is important to have a smart  
32 (automatic) system in place that could proactively identify them and assess their risks.  
33  
34

35 *“I think the challenge first of all who are the high-risk patients, can we identify them and, if we*  
36 *can, is there a way through case management or community matrons, you know, linked with*  
37 *the stroke teams in the community providing access to therapy and assessment when it’s*  
38 *required in a timely fashion” (commissioner, Interview)*  
39  
40

## 41 **Development of DOTT decision aid**

42 The above themes and solutions were proposed, designed and refined during the collaborative design  
43 process with stakeholders, which informed the design of DOTT (Deciding on Treatments Together).  
44 DOTT is a computerised decision aid (i.e., a DSS designed to facilitate SDM), integrated with the EHR  
45 system, to be used in primary care during clinical consultations between the healthcare professional  
46 and stroke survivor, aiming to facilitate SDM on treatments to reduce recurrent stroke risk.  
47  
48  
49

50 Specifically, DOTT will:

- 51  
52  
53 (1) Allow stroke survivors to indicate, in a graphic presentation (Figure 2), **their perceived risk of**  
54 **having a further stroke**. The graphic presentation in DOTT is based on population rank<sup>43,44</sup>  
55 simulating a queue of 20 people around the same age of the stroke survivor. Stroke survivors  
56 indicate where they think they are positioned in the queue (from least to most likely). This risk  
57 would then be compared to the actual predicted risk to facilitate conversation on risk factors.  
58 Needs from theme 3 are addressed with this feature.  
59  
60

- 1  
2  
3  
4 (2) Display **stroke survivor's predicted risk of having a further stroke** in a meaningful and  
5 understandable way for both healthcare professionals and stroke survivors. For the usability  
6 evaluation, the system displayed a 'typical' recurrent stroke risk based on age<sup>37</sup>. The final  
7 personalised stroke risk model is under development and will be calculated based on the patient's  
8 information from the EHR and on rules generated from the linked dataset (SLSR and LDN). This  
9 will include variables such as age, gender, medical history (e.g., hypertension, atrial fibrillation),  
10 type of stroke and time since stroke. Needs from theme 2 are addressed with this feature (see  
11 Figure 2).  
12
- 13  
14 (3) Provide a **list of personalised recommended treatments** for stroke survivors based on their risk  
15 factors (e.g., hypertension, atrial fibrillation) extracted from the EHR. A list of the most effective  
16 evidence-based treatments for secondary prevention would be compiled and extracted from the  
17 recent NICE guidelines<sup>45</sup> and the National Clinical Guideline for Stroke.<sup>46</sup> This includes both clinical  
18 and lifestyle recommendations. For each recommended treatment, the evidence supporting the  
19 treatment will also be displayed. Needs from section 4 are addressed with this feature.  
20
- 21 (4) **Prioritise the recommended treatments** based on their relative risk reduction and present the  
22 most effective treatment first. The clinician and stroke survivor can select one or more treatments  
23 and see on the graphic display, how the treatments reduce the overall stroke risk. The benefit of  
24 each treatment in terms of stroke risk will be calculated using the linked dataset (SLSR and LDN).  
25 Needs from theme 5 are addressed with this feature.  
26
- 27 (5) **Display stroke survivors' common concerns** on the suggested treatments (e.g., "do I have to take  
28 blood pressure drugs for life?"), which will aid in identifying and addressing barriers to treatment  
29 adherence and eliciting preferences. An initial list of concerns and their response was prepared  
30 based on qualitative studies eliciting patients' barriers to treatment adherence.<sup>47,48</sup> Needs from  
31 theme 6 are addressed with this feature  
32
- 33 (6) Allow stroke survivors and their carers to discuss the different treatments with the healthcare  
34 professional and **jointly select the treatments that best suit the stroke survivor's preferences,**  
35 **desired outcomes and goals** (and remove the ones that do not). Lifestyle modification will be  
36 discussed during the consultation and enhanced through referral to specialists or lifestyle  
37 intervention programs. The agreed management plan and information on the different  
38 treatments will be printed and handed to the stroke survivor to take home. Needs from theme 1  
39 are addressed with this feature.  
40
- 41 (7) Set automatically a **follow-up appointment** in 3 months' time. The information entered, including  
42 the agreed management plan is saved and transferred back to the stroke survivor's EHR for future  
43 consultations. During the follow-up consultation, the management plan is reviewed and  
44 treatments to address risk factors for stroke recurrence can be added, modified or removed.  
45 Desired clinical and patient outcomes will also be reviewed. Current NICE guidelines<sup>45</sup> for  
46 'Secondary prevention following stroke and TIA' recommend primary care follow up on discharge,  
47 six months and then annually. A three-month follow up was selected as a reasonable interval for  
48 healthcare professionals and to provide enough time for patients to adhere to the selected  
49 treatments. Needs from theme 7 are addressed with this feature.  
50
- 51 (8) The stroke prediction model will also be used to **proactively identify individuals at high risk of a**  
52 **recurrent stroke** by calculating their recurrent stroke risk at defined periods of time (the practice  
53 can define the desired threshold) and alert the practice (e.g., physician, nurse, receptionist) to  
54 invite those patients for a clinical consultation. Needs from theme 8 are addressed with this  
55 feature.  
56  
57  
58  
59  
60



(9) All information from patients and healthcare professionals (e.g., treatments selected by the patient, desired outcomes, predicted stroke risk, results in follow-up) will be **captured by the system as part of a LHS** and be used to improve the system's predictive model and treatment recommendations.

Figure 2 depicts an example screenshot from DOTT decision aid prototype.

<Insert Figure 2 here>

## Usability and acceptability evaluation

### Demographics

Eight stroke survivors and eight GPs participated in the usability and acceptability evaluations. GPs (4 men, 4 women) had average of 10.3 years of experience as a GP. All had experience in providing care to stroke survivors, had medium to high confidence in using new technology and low to medium experience using DSS. Stroke survivors (4 men, 4 women) had an average age of 65.5 years (SD: 11.4, range: 49-81). All had hypertension, two had heart problems, one was suffering from depression, four had mobility issues, and four had minor cognitive deficiencies (attention and memory).

### Usability and acceptability

Both GPs and stroke survivors found the decision aid usable and acceptable. GPs found the decision aid easy to use (score 4.3), easy to understand (4.1) and felt very confident using it (4.2). They thought that this decision aid was better than how they usually helped patients decide about treatments for controlling their risk factors (4.4), that this strategy was compatible with the way they thought things should be done (4.3), that this type of decision aid was suitable for helping patients make informed choices (4.0) and that the decision aid complemented their usual approach (4.4). Stroke survivors perceived that they would like to use the decision aid frequently (4.0), thought that it was easy to use (4.2) and felt confident using it (4.1). Initial findings of the usability evaluation can be found in Porat et al.<sup>49</sup>

### Identified themes

Seven main themes relating to the usability and acceptability of the decision aid were identified. These were divided into themes relating to the importance of the decision aid, its functionality and concerns from using it.

#### *Importance of the decision aid*

##### Logical and structured process that facilitates discussion

All GPs and stroke survivors (N=16) found the decision aid to be clear, and consisting of a logical flow that helped to structure the consultation. They felt that the decision aid facilitated a transparent discussion on the different proposed treatments and elicited patients' preferences.

*"Physician pointing out what to do but the patient makes the decision since it's hard to get your head around everything. More doable if you have specific areas to work on with specific targets that suits you" (stroke survivor 2)*

### Importance of a learning system

Several GPs (N=3) raised the importance of a learning system providing up-to-date information. They wanted to make sure that the suggested treatments are in line with the most up-to-date evidence.

*“The learning aspect is very important, since this system is based on evidence and evidence can change” (GP 6)*

### Can motivate patients to change behaviour

All GPs and stroke survivors (N=16) believed that the decision aid could motivate patients to change behaviour (e.g., take their medication to reduce blood pressure, increase physical activity, eat healthy). Stroke survivors liked the idea of being involved in deciding on their treatments according to their preferences and abilities, receiving information on their stroke risk factors, and discussing their views and concerns with their GP. They felt it gave them more control over their health and motivation to adhere to the treatments they selected. GPs felt it was a good way to discuss the different treatments and give patients the power to decide on treatments that suit them. A number of GPs and stroke survivors agreed that sharing decisions and enabling patients to select the treatments that best meet their preferences and goals, may increase patients' feeling of ownership over their health and improve adherence to the selected treatments.

*“I believe discussing the different options with the patients, shared decision making, is likely to improve adherence” (GP 1).*

### Functionality

#### Powerful risk display showing the benefit of each treatment

The vast majority of GPs and stroke survivors (N=15) found the visual display showing the risk before and after a selected intervention, easy to understand, with some viewing it as a 'powerful' tool. Both stroke survivors and GPs commented that they were not aware of the effect the treatments have on reducing the stroke risk.

*“The most powerful thing is the visual shifting of risk” (GP 5)*

*“Wow, a small change can make a big difference, this is very encouraging” (stroke survivor 6)*

#### The patient takes home printed information

GPs and stroke survivors (N=10) thought that it was very important that the patient has a copy of the management plan and all the information printed so they can review it at home. In particular, stroke survivors wanted to have their current predicted risk and information on their selected treatments, including the date of the follow up appointment printed out, so it could motivate them to adhere to their treatments.

*“The important thing is that the patient goes out with a piece of paper that summarises in bullet points the outcome of the consultation. If its black and white on paper it makes a difference” (stroke survivor 3)*

### Concerns

GPs and stroke survivors raised two main concerns from using the decision aid.

### Deals with one aspect of the consultation

GPs and stroke survivors (N=6) felt that the decision aid is good but focuses on one aspect of the consultation (reducing risk of recurrent stroke) and patients may have other concerns, such as depression or social isolation.

*“This is good, but for me the most important thing is the emotional aspect, and this tool doesn’t relate to that” (stroke survivor 4)*

### Time

The main concern for GPs was time (N=6), in which within the allotted standard 10 minutes for the consultation already provided significant limits, and most felt they will not manage to fit it in.

### **Suggestions for improvement**

GPs and stroke survivors provided suggestions for improving the decision aid:

1. The terminology was too clinical, for example “treatments” and “management”, could be changed to “possible strategies or approaches”.
2. In addition to the management plan, information (e.g., in the form of a leaflet) on each of the selected treatments should also be printed out and given to patients.
3. Add clinical data, for example when clicking on “cholesterol” show the patient’s last three values, and do this also for their blood pressure.
4. Enable more than one display of risk, because each patient may prefer a different display and understands risk differently.
5. Add emotional and mental health aspects which are related to stroke risk.

We subsequently made the above changes and additions to the updated version of DOTT.

## **DISCUSSION**

Our work focused on engaging various stakeholders in the identification, design, prototyping and evaluation of a decision aid to improve secondary prevention after stroke. Eight themes informed the design of DOTT. A number of the themes and solutions proposed by the stakeholders have been implemented previously to some extent to support other patient groups, such as diabetes and atrial fibrillation.<sup>50,51</sup> These include, predicting a patient’s risk based on their risk factors, proposing possible treatments and displaying their benefit in decreasing the risk<sup>50</sup> and incorporating patients’ concerns within the decision making process.<sup>51</sup> These themes were found useful and are recommended in SDM tools (e.g., in the IPDAS<sup>23</sup>).

Additional unique themes and solutions have emerged as outcomes of the collaborative design process in this study, which could be used for a range of chronic diseases requiring long-term management. Specifically:

(1) **Present and communicate risk in a meaningful way.** While there are many different ways to communicate multiple risks to patients, the most commonly used are absolute or relative risks presented as percentages or probabilities (e.g., “from 100 people like you 20 are expected to have a recurrent stroke”).<sup>52</sup> However, studies have shown that in general, healthcare professionals are as unfamiliar as their patients with risk estimates and probabilities<sup>53</sup> and often healthcare professionals have reported finding it difficult to combine multiple risk factors into an accurate assessment of vascular risk<sup>54</sup> and to communicate this risk to patients.<sup>55</sup> Moreover, patients may feel that statistical

1  
2  
3 risk estimates do not apply to them personally.<sup>56</sup> To overcome this, our graphic presentation is based  
4 on population rank, simulating the patient in a queue of people around their age.<sup>43,44</sup> Studies have  
5 also shown that formats which present data framed as the risk of an individual were perceived as  
6 more relevant and easier to relate to than percentage risk estimates.<sup>57</sup>  
7  
8

9 **(2) Compare patient's perceived risk with their predicted risk.** This is a novel requirement from a DSS,  
10 which to our knowledge does not exist in current systems. Perceived risk of adverse outcomes such  
11 as stroke may be an important concept in understanding patient's adherence to medication and  
12 recommended health behaviours.<sup>58</sup> Overall, patients tend to underestimate their own risk.<sup>59</sup> This  
13 tendency was also found when patients estimated their cardiovascular risk.<sup>60</sup> Weinstein refers to this  
14 underestimation as an "optimistic bias".<sup>59</sup> For example, a recent study found that people with  
15 undiagnosed diabetes or prediabetes considerably underestimated their probability to have or  
16 develop diabetes.<sup>61</sup> Lower perceived risk has been associated with poorer adherence to  
17 recommended health behaviours<sup>62</sup> and hence a more realistic perception of risk may increase  
18 patients' interest in risk reduction.<sup>62</sup> Research has shown that individualised risk feedback was  
19 effective in increasing perceived stroke risk among patients who had underestimated their stroke risk  
20 at baseline.<sup>63</sup> This may imply that eliciting patients' perceived risk and showing them the actual  
21 predicted risk, can change their inaccurate risk perception and increase their interest in risk reduction.  
22  
23

24  
25  
26 **(3) Prioritising treatments.** Healthcare professionals have previously expressed concerns about  
27 managing care and making decisions about treatments, including communicating risks and benefits  
28 for patients with multimorbidity and complex needs.<sup>64</sup> They commonly report having to make  
29 decisions with such patients which involve a process of prioritisation or trade-offs, facilitating a  
30 discussion with the patient on what is important to the patient and what they would like to achieve  
31 in terms of their health (i.e. goal setting).<sup>64</sup> Aligning patient goals and desired outcomes with clinicians'  
32 goals is likely to improve outcomes for these patients.<sup>65</sup>  
33  
34

35  
36 **(4) Identify individuals at high risk.** Calculating periodically (in an automatic way) the stroke risk of  
37 survivors to identify individuals at high risk of recurrent stroke (based on their information in the EHR)  
38 could be a valuable feature for improving long-term management and care for stroke survivors who  
39 are less likely or able to visit healthcare professionals on a regular basis. This theme was identified and  
40 prioritised by healthcare professionals and commissioners/policy makers and not by stroke survivors  
41 or carers, emphasising the importance of treating vulnerable patients in a timely manner and provide  
42 proactive patient-centred care. This is in line with the NHS Long Term Plan set in 2019.<sup>66</sup>  
43 Patients/carers who participated in the focus groups were relatively mobile and maybe this was less  
44 of a priority for them.  
45  
46

47  
48 These solutions, which are delivered through a DSS integrated with the EHR system and based on data  
49 from a linked population dataset, have the potential to be an instrument of change in clinical practice.  
50 This will be done by providing scientific evidence at the point of clinical care (e.g., personalised  
51 treatments and their benefit based on the individual's risk factors), while simultaneously collecting  
52 information from that care (e.g., treatments selected by the patient, desired outcomes, predicted  
53 stroke risk) to promote innovation in optimal healthcare delivery.<sup>17</sup>  
54  
55

## 56 **Strengths and limitations**

57  
58 Although the core focus of the DSS (prevention of a future stroke) was identified by patients as a  
59 priority, having a single focus might hinder discussions of other important problems (e.g., depression,  
60

1  
2  
3 social isolation). Such issues may even have a larger perceived impact on long-term outcomes after  
4 stroke, for example, improving mental health or access to social care services, which were also  
5 brought up by stakeholders as a priority to address long-term care for stroke survivors with  
6 multimorbidity,<sup>14</sup> and were raised as a concern in the usability and acceptability evaluations.  
7 Depression is indeed a risk factor of stroke,<sup>67</sup> and the treatment ‘manage low mood/depression’ will  
8 be displayed to all patients, enabling healthcare professionals to relate to this aspect and propose  
9 ways to manage this (e.g., medication, referral to a professional, group therapy).  
10  
11  
12

13 In a study assessing stroke survivors’ self-reported needs,<sup>68</sup> more than 50% of long-term stroke  
14 survivors reported an unmet need for stroke information (e.g. cause, prevention of recurrence). The  
15 proposed decision aid offers a meaningful starting point for addressing this common unmet need.  
16 Evidence suggests that the provision of lifestyle advice from healthcare professionals’ is effective in  
17 changing health behaviours<sup>69</sup> and healthcare professionals’ communication is positively correlated  
18 with patient adherence to treatments.<sup>70</sup> However, a conversation-based DSS also relies on the  
19 attitudes and communication skills of the healthcare professionals, which have been found to vary.<sup>71</sup>  
20 Interactive SDM skill training has improved SDM skills and promoted positive attitudes.<sup>72</sup> Training  
21 healthcare professionals in communication skills for SDM has also been shown to result in substantial  
22 and significant improvement in patient adherence to treatments.<sup>70</sup> Hence, interactive SDM skills  
23 training workshops will have to complement the use of the DSS. Patients are also likely to need support  
24 and preparation with taking part in SDM during the consultation.<sup>72</sup>  
25  
26  
27  
28  
29

30 The design of DOTT meets the IPDAS collaboration criteria for quality decision aids.<sup>23</sup> Specifically, DOTT  
31 was designed to incorporate principles of SDM, by presenting stroke survivors with information about  
32 their treatment options and likely outcomes, presenting the risks and benefits of each option, and  
33 engaging the healthcare professional and stroke survivor in a joint conversation about the patient’s  
34 preferences.<sup>32</sup> Furthermore, DOTT evolves from a systematic development process, uses non-  
35 technical language and presents information in a balanced manner that allows for comparisons across  
36 alternatives.<sup>23</sup> Wearable sensors (e.g., Fitbit, Apple Watch, blood pressure monitor) could further help  
37 patients monitor and self-manage the selected treatments (e.g., control blood pressure, increase  
38 physical activity) outside the consultation. In the future, data from wearable sensors could be  
39 integrated to the EHR, and DOTT could use this information to improve its risk prediction model and  
40 treatment recommendations.  
41  
42  
43  
44

45 In the usability and acceptability evaluation, stroke survivors and GPs found DOTT to be both useful  
46 and usable. GPs perceived that the decision aid helped with structuring the consultation and eliciting  
47 patients’ preferences for treatments. Stroke survivors felt it provides a good way to understand the  
48 different treatment options and select the ones that best suits their preferences. GPs’ main concern  
49 was that the decision aid would increase consultation times. Indeed, time constraints were identified  
50 as the main barrier for the adoption of innovations by family physicians.<sup>73,74</sup> A possible solution could  
51 be to use the decision aid as part of a clinical review after stroke, which is usually longer (e.g., 3 month,  
52 6 month and annual review) and by dedicated healthcare professionals which are less limited in time  
53 such as stroke nurses and pharmacists working in GPs’ practices that are trained to consult patients  
54 with chronic and long-term health conditions.  
55  
56  
57  
58

## 59 CONCLUSION

60

1  
2  
3 Engaging various stakeholders throughout the design and evaluation process ensures that the  
4 intervention (features and functions) is in line with the needs reported by the different stakeholders  
5 (i.e., stroke survivors, healthcare professionals, policy makers). DOTT has demonstrated the potential  
6 to reduce stroke recurrence by adopting a data-driven user-centred approach. DOTT urges clinicians  
7 to shift away from the professionally led advice-giving approach typically used in medical  
8 consultations to one which collaboratively and actively engages the patient in decision making and  
9 respects patient choice and autonomy. This may lead to stroke survivors taking ownership for the  
10 treatment decisions, improving their adherence to the agreed management plan and thus reducing  
11 their stroke risk. A future feasibility study and subsequent clinical trial will evaluate the effectiveness  
12 of DOTT in improving decision making quality, and whether it affects risk factor levels and risk of  
13 recurrence. While DOTT currently targets stroke risk factors only, the design approach and its features  
14 could be used for a range of chronic diseases requiring long-term management, paving the way to a  
15 set of standards for delivering LHS interventions in clinical practice.  
16  
17  
18  
19  
20

21 **Acknowledgments:** The research team are very grateful to all the stakeholders that participated in  
22 the study including stroke survivors, carers, healthcare professionals, policy makers and  
23 commissioners. We would like to thank specifically the King's College London Stroke Research Patients  
24 and Family Group for their valuable comments that helped improve the design of the decision aid.  
25  
26

27 **Author Contributions:** Conception and design of study: TP, IM, ES, MAV, CK, CDAW, VC. Data  
28 collection: TP, IM, ES. Thematic Analysis and interpretation of data: TP, IM, ES, MAV, VC. Initial draft  
29 of manuscript: TP. Revising the paper critically for important intellectual content: TP, IM, ES, MAV, CK,  
30 CDAW, VC. Sign off final version of manuscript: TP, IM, ES, MAV, CK, CDAW, VC.  
31  
32

33 **Funding:** This work was supported by the National Institute for Health Research (NIHR) Collaboration  
34 for Leadership in Applied Health Research and Care (CLAHRC) South London at King's College Hospital  
35 NHS Foundation Trust, and the NIHR Biomedical Research Centre, Guy's and St Thomas' NHS  
36 Foundation Trust and King's College London, UK (award number NIHR CLAHRC-2013-10022). The  
37 views expressed are those of the authors and not necessarily those of the NIHR or the Department of  
38 Health and Social Care.  
39  
40  
41

42 **Competing interests:** None declared.  
43  
44

45 **Patient consent:** Not required.  
46

47 **Ethics approval:** Approval for stages one and two of this study was granted by the National Research  
48 Ethics Service (NRES) Committee North East-Tyne and Wear South (REC reference number:  
49 14/NE/1149) and for stage three of this study by the East of England – Cambridgeshire and  
50 Hertfordshire Research Ethics Committee (REC reference number: 17/EE/0161).  
51  
52

53 **Data sharing statement:** There are no additional data available from this study.  
54  
55

56 **Checklist for reporting guidelines:** the authors used SRQR guidelines for reporting qualitative  
57 research.  
58  
59  
60



## REFERENCES

1. Katan M, Luft A. Global burden of stroke. In *Seminars in neurology* 2018 Apr; 38(2):208-211. Thieme Medical Publishers.
2. King's College London. The burden of stroke in Europe, the challenge for policy makers for the Stroke Alliance for Europe (SAFE); 2015.
3. Mohan KM, Wolfe CD, Rudd AG, Heuschmann PU, Kolominsky-Rabas PL, Grieve AP. Risk and cumulative risk of stroke recurrence: a systematic review and meta-analysis. *Stroke* 2011;42:1489–94.
4. Stroke Association UK, State of the Nation, stroke statistics, February 2018. [https://www.stroke.org.uk/system/files/sotn\\_2018.pdf](https://www.stroke.org.uk/system/files/sotn_2018.pdf)
5. Kernan WN, Ovbiagele B, Black HR, Bravata DM, Chimowitz MI, Ezekowitz MD, Fang MC, Fisher M, Furie KL, Heck DV, Johnston SC. Guidelines for the prevention of stroke in patients with stroke and transient ischemic attack: a guideline for healthcare professionals from the American Heart Association/American Stroke Association. *Stroke*. 2014 Jul;45(7):2160-236.
6. Chen R, McKeivitt C, Crichton SL, Rudd AG, Wolfe CD. Socioeconomic deprivation and provision of acute and long-term care after stroke: the South London Stroke Register cohort study. *J Neurol Neurosurg Psychiatry*. 2014 Dec 1;85(12):1294-300.
7. Marshall IJ, Wang Y, McKeivitt C, Rudd AG, Wolfe CD. Trends in risk factor prevalence and management before first stroke: data from the South London Stroke Register 1995–2011. *Stroke*. 2013 Jul;44(7):1809-16.
8. Bridgwood B, Lager KE, Mistri AK, Khunti K, Wilson AD, Modi P. Interventions for improving modifiable risk factor control in the secondary prevention of stroke. *Cochrane Database of Systematic Reviews*. 2018(5).
9. Dregan A, van Staa TP, McDermott L, McCann G, Ashworth M, Charlton J, Wolfe CD, Rudd A, Yardley L, Gulliford MC, Meredith S. Point-of-care cluster randomized trial in stroke secondary prevention using electronic health records. *Stroke*. 2014 Jul;45(7):2066-71.
10. Kawamoto K, Houlihan CA, Balas A, Lobach DF. Improving clinical practice using clinical decision support systems: A systematic review of trials to identify features critical to success. *British Medical Journal* 2005;330:765–768.
11. Shibl R, Lawley M, Debuse J. Factors influencing decision support system acceptance. *Decision Support Systems* 2013;54:953–961
12. Gallacher, K. I., Batty, G. D., McLean, G., Mercer, S. W., Guthrie, B., May, C. R., ... & Mair, F. S. Stroke, multimorbidity and polypharmacy in a nationally representative sample of 1,424,378 patients in Scotland: implications for treatment burden. *BMC medicine* 2014; 12(1), 151.
13. Guthrie B, Payne K, Alderson P, McMurdo ME, Mercer SW. Adapting clinical guidelines to take account of multimorbidity. *Bmj*. 2012 Oct 4;345:e6341.
14. Sadler E, Porat T, Marshall I, Hoang U, Curcin V, Wolfe CD, McKeivitt C. Shaping innovations in long-term care for stroke survivors with multimorbidity through stakeholder engagement. *PloS one* 2017;12(5):e0177102.
15. Nwaru BI, Friedman C, Halamka J and others (2017) 'Can learning health systems help organisations deliver personalised care?', *BMC Med* 2017 15: 177
16. Scobie S, Castle-Clarke, S. What can the NHS learn from learning health systems? Nuffield Trust, May, 2019.



17. Maddox TM, Albert NM, Borden WB, Curtis LH, Ferguson TB, Kao DP, ... Shah ND. The Learning Healthcare System and Cardiovascular Care: A Scientific Statement From the American Heart Association. *Circulation* 2017;135(14):e826-e857.
18. Kostopoulou O, Porat T, Corrigan D, Mahmoud S, Delaney BC. Diagnostic accuracy of GPs when using an early intervention decision support system: a high-fidelity simulation. *Br J Gen Pract*. 2017.
19. Califf RM, Robb MA, Bindman AB, Briggs JP, Collins FS, Conway PH, ... Dymek C. Transforming evidence generation to support health and health care decisions. *N Engl J Med* 2016; 375:2395-2400.
20. Crandall W, Kappelman MD, Colletti RB, Leibowitz I, Grunow JE, Ali S, et al. ImproveCareNow: the development of a paediatric inflammatory bowel disease improvement network. *Inflammatory Bowel Diseases*. 2011; 17(1): 450–57. pmid:20602466
21. Starks H, Shaw JL, Hiratsuka V, Dillard DA, Robinson R. Engaging stakeholders to develop a depression management decision support tool in a tribal health system. *Quality of Life Research*. 2015; 24(5), 1097–105. pmid:25246185
22. Chewning B, Bylund CL, Shah B, Arora NK, Gueguen JA, Makoul G. Patient preferences for shared decisions: a systematic review. *Patient education and counseling*. 2012 Jan 1;86(1):9-18.
23. Elwyn G, O'Connor A, Stacey D, Volk R, Edwards A, Coulter A, Thomson R, Barratt A, Barry M, Bernstein S, Butow P. Developing a quality criteria framework for patient decision aids: online international Delphi consensus process. *Bmj*. 2006 Aug 24;333(7565):417.
24. Barry MJ, Edgman-Levitan S. Shared decision making—the pinnacle of patient-centered care. *New England Journal of Medicine* 2012;366(9):780-781.
25. Stiggelbout AM, Van der Weijden T, De Wit MP, Frosch D, Légaré F, Montori VM, Trevena L, Elwyn G. Shared decision making: really putting patients at the centre of healthcare. *Bmj*. 2012 Jan 27;344:e256.
26. Heisler M, Bouknight RR, Hayward RA, Smith DM, Kerr EA. The relative importance of physician communication, participatory decision making, and patient understanding in diabetes self-management. *Journal of General Internal Medicine* 2002;17(4):243-252.
27. Wilson SR, Strub P, Buist AS, Knowles SB, Lavori PW, Lapidus J, Vollmer WM. Shared treatment decision making improves adherence and outcomes in poorly controlled asthma. *American journal of respiratory and critical care medicine*. 2010 Mar 15;181(6):566-77.
28. Berg M. Patient Care Information Systems and Health Care Work: A Sociotechnical Approach. *International Journal of Medical Informatics* 1999;55(2):87–101.
29. Stewart JA, Dundas R, Howard RS, Rudd AG, Wolfe CDA. Ethnic differences in incidence of stroke: prospective study with stroke register. *BMJ*, 1999;318(7189):967-971.
30. Schofield P, Baawuah F, Seed PT, Ashworth M. Managing hypertension in general practice: a cross-sectional study of treatment and ethnicity. *Br J Gen Pract*. 2012 Oct 1;62(603):e703-9.
31. King's College London's Stroke Research Patient and Family Group (SRPFG). [www.kcl.ac.uk/lsm/research/divisions/hscr/research/groups/stroke/forpatientsandfamily/patientsandfamily.aspx](http://www.kcl.ac.uk/lsm/research/divisions/hscr/research/groups/stroke/forpatientsandfamily/patientsandfamily.aspx)
32. Elwyn G, Frosch D, Thomson R, Joseph-Williams N, Lloyd A, Kinnersley P, Cording E, Tomson D, Dodd C, Rollnick S, Edwards A. Shared decision making: a model for clinical practice. *Journal of general internal medicine*. 2012 Oct 1;27(10):1361-7.
33. O'Connor AM, Cranney A. User Manual-Acceptability. Ottawa Hospital Research Institute, 2002.
34. Brooke J. SUS-A quick and dirty usability scale. *Usability evaluation in industry*, 1996;189:4-7.

- 1
  - 2
  - 3
  - 4
  - 5
  - 6
  - 7
  - 8
  - 9
  - 10
  - 11
  - 12
  - 13
  - 14
  - 15
  - 16
  - 17
  - 18
  - 19
  - 20
  - 21
  - 22
  - 23
  - 24
  - 25
  - 26
  - 27
  - 28
  - 29
  - 30
  - 31
  - 32
  - 33
  - 34
  - 35
  - 36
  - 37
  - 38
  - 39
  - 40
  - 41
  - 42
  - 43
  - 44
  - 45
  - 46
  - 47
  - 48
  - 49
  - 50
  - 51
  - 52
  - 53
  - 54
  - 55
  - 56
  - 57
  - 58
  - 59
  - 60
35. ISO 9241-210:2010. Ergonomics of human system interaction – part 210 Human-centred design for interactive systems. <https://www.iso.org/standard/52075.html>
36. Lewis, J. R., & Sauro, J. (2009). The factor structure of the System Usability Scale. In *Human-centered design* (pp. 94–103). Berlin, Germany: Springer. doi:10.1007/978-3-642-02806-9\_12
37. Mohan KM, Crichton SL, Grieve AP, et al. Frequency and predictors for the risk of stroke recurrence up to 10 years after stroke: the South London Stroke Register. *Journal of Neurology, Neurosurgery & Psychiatry*. 2009 May 21.
38. Hankey GJ. Secondary stroke prevention. *The Lancet Neurology*. 2014 Feb 1;13(2):178-94.
39. Hankey GJ. Stroke: how large a public health problem, and how can the neurologist help?. *Archives of neurology*. 1999 Jun 1;56(6):748-54.
40. Mora S, Cook N, Buring JE, et al. Physical activity and reduced risk of cardiovascular events: potential mediating mechanisms. *Circulation*. 2007 Nov 6;116(19):2110-8.
41. He FJ, Nowson CA, MacGregor GA. Fruit and vegetable consumption and stroke: meta-analysis of cohort studies. *The Lancet*. 2006 Jan 28;367(9507):320-6.
42. Braun V, Clarke V. Using thematic analysis in psychology. *Qualitative Research in Psychology*; 2006;3:77–101.
43. Tunstall-Pedoe H. The Dundee coronary risk-disk for management of change in risk factors. *BMJ* 1991;303:744–747.
44. Marshall IJ, Wolfe CD, McKeivitt C. ‘People like you?’: how people with hypertension make sense of future cardiovascular risk—a qualitative study. *BMJ open*. 2018 Nov 1;8(11):e023726.
45. NICE Guidelines. Stroke and TIA. Scenario: Secondary prevention following stroke and TIA. <https://cks.nice.org.uk/stroke-and-tia#!scenario:2>
46. Intercollegiate Stroke Working Party (ISWP). National Clinical Guideline for Stroke, 5th edn. 2016. London: Royal College of Physicians. [https://www.strokeaudit.org/SupportFiles/Documents/Guidelines/2016-National-Clinical-Guideline-for-Stroke-5t-\(1\).aspx](https://www.strokeaudit.org/SupportFiles/Documents/Guidelines/2016-National-Clinical-Guideline-for-Stroke-5t-(1).aspx)
47. Marshall IJ, Wolfe CD, McKeivitt C. Lay perspectives on hypertension and drug adherence: systematic review of qualitative research. *BMJ*, 2012;345:e3953.
48. Pound P, Britten N, Morgan M, Yardley L, Pope C, Daker-White G, Campbell R. Resisting medicines: a synthesis of qualitative studies of medicine taking. *Social science & medicine*. 2005 Jul 1;61(1):133-55.
49. Porat T, Liao Z, Curcin V. Engaging Stakeholders in the Design and Usability Evaluation of a Decision Aid to Improve Secondary Stroke Prevention. *Studies in health technology and informatics*. 2018;247:765-9.
50. Nolan T, Dack C, Pal K, Ross J, Stevenson FA, Peacock R, Pearson M, Spiegelhalter D, Sweeting M, Murray E. Patient reactions to a web-based cardiovascular risk calculator in type 2 diabetes: a qualitative study in primary care. *Br J Gen Pract*. 2015 Mar 1;65(632):e152-60.
51. Kaiser K, Cheng WY, Jensen S, Clayman ML, Thappa A, Schwiep F, Chawla A, Goldberger JJ, Col N, Schein J. Development of a shared decision-making tool to assist patients and clinicians with decisions on oral anticoagulant treatment for atrial fibrillation. *Current medical research and opinion*. 2015 Dec 2;31(12):2261-72.
52. Ahmed H, Naik G, Willoughby H, Edwards AG. Communicating risk. *Bmj*. 2012 Jun 18;344:e3996.
53. Perneger TV, Agoritsas T. Doctors and patients’ susceptibility to framing bias: a randomized trial. *Journal of General Internal Medicine*, 2011;26(12):1411-1417.

- 1
  - 2
  - 3
  - 4
  - 5
  - 6
  - 7
  - 8
  - 9
  - 10
  - 11
  - 12
  - 13
  - 14
  - 15
  - 16
  - 17
  - 18
  - 19
  - 20
  - 21
  - 22
  - 23
  - 24
  - 25
  - 26
  - 27
  - 28
  - 29
  - 30
  - 31
  - 32
  - 33
  - 34
  - 35
  - 36
  - 37
  - 38
  - 39
  - 40
  - 41
  - 42
  - 43
  - 44
  - 45
  - 46
  - 47
  - 48
  - 49
  - 50
  - 51
  - 52
  - 53
  - 54
  - 55
  - 56
  - 57
  - 58
  - 59
  - 60
54. Kenning C, Fisher L, Bee P, Bower P, Coventry P. Primary care practitioner and patient understanding of the concepts of multimorbidity and self-management: A qualitative study. Sage Open Medicine 2013.
55. Redfern J, Rudd AD, Wolfe CD, McKeivitt C. Stop stroke: development of an innovative intervention to improve risk factor management after stroke. Patient education and counseling. 2008 Aug 1;72(2):201-9.
56. Emmons KM, Koch-Weser S, Atwood K, Conboy L, Rudd R, Colditz G. A qualitative evaluation of the Harvard Cancer Risk Index. Journal of health communication. 1999 Sep 1;4(3):181-93.
57. Soureti A, Hurling R, Murray P, van Mechelen W, Cobain M. Evaluation of a cardiovascular disease risk assessment tool for the promotion of healthier lifestyles. *European Journal of Cardiovascular Prevention & Rehabilitation*,2010;17(5):519-523.
58. Powers BJ, Oddone EZ, Grubber JM, Olsen MK, Bosworth HB. Perceived and actual stroke risk among men with hypertension. The Journal of Clinical Hypertension. 2008 Apr;10(4):287-94.
59. Weinstein ND. Why it won't happen to me: perceptions of risk factors and susceptibility. Health Psychol. 1984;3:431-457.
60. Petr EJ, Ayers C, Pandey A, de Lemos J, Powell-Wiley TM, Khera A, et al. Perceived Lifetime Risk for Cardiovascular Disease (From the Dallas Heart Study). The American journal of cardiology. 2014;114(1):53-8. doi: 10.1016/j.amjcard.2014.04.006
61. Kowall B, Rathmann W, Stang A, Bongaerts B, Kuss O, Herder C, Roden M, Quante A, Holle R, Huth C, Peters A, Meisinger C. Perceived risk of diabetes seriously underestimates actual diabetes risk: The KORA FF4 study. PLoS One. 2017 Jan 31;12(1):e0171152. doi: 10.1371/journal.pone.0171152.
62. Weinstein ND. Unrealistic optimism about susceptibility to health problems. Journal of behavioral medicine. 1982 Dec 1;5(4):441-60.
63. Kreuter MW, Strecher VJ. Changing inaccurate perceptions of health risk: results from a randomized trial. Health psychology. 1995 Jan;14(1):56.
64. Tsisis P, Bains J. Management of complex chronic disease: facing the challenges in the Canadian health-care system. *Health Serv Manage Res* 2008;21:228-35.
65. Kuluski K, Gill A, Naganathan G, Upshur R, Jaakkimainen RL, Wodchis WP. A qualitative descriptive study on the alignment of care goals between older persons with multi-morbidities, their family physicians and informal caregivers. BMC Family Practice. 2013 Dec;14(1):133.
66. The NHS Long Term Plan, January 2019. <https://www.longtermplan.nhs.uk/wp-content/uploads/2019/01/nhs-long-term-plan.pdf>
67. Jonas BS, Mussolino ME. Symptoms of depression as a prospective risk factor for stroke. Psychosomatic medicine 2000;62:463-471.
68. McKeivitt C, Fudge N, Redfern J, Sheldenkar A, Crichton S, Rudd AR, Forster A, Young J, Nazareth I, Silver LE, Rothwell PM. Self-reported long-term needs after stroke. Stroke. 2011 May;42(5):1398-403.
69. Kenkel D, Terza JV. The effect of physician advice on alcohol consumption: count regression with an endogenous treatment effect. *J. App. Econom.* 2001;16:165-184.
70. Zolnieriek KBH, DiMatteo MR. Physician communication and patient adherence to treatment: a meta-analysis. *Medical Care*, 2009;47(8):826.
71. Breslin M, Mullan RJ, Montori VM. The design of a decision aid about diabetes medications for use during the consultation with patients with type 2 diabetes. *Patient Education and Counseling*, 2008;73(3):465-472.

- 1  
2  
3 72. Joseph-Williams N, Lloyd A, Edwards A, Stobbart L, Tomson D, Macphail S, Dodd C, Brain K, Elwyn  
4 G, Thomson R. Implementing shared decision making in the NHS: lessons from the MAGIC  
5 programme. *Bmj*. 2017 Apr 18;357:j1744.  
6  
7 73. Stokes K, Barker R, Pigott R. Which doctors take up promising ideas? New insights from open data.  
8 *Nesta*. 2014.  
9  
10 74. Porat T, Delaney B, Kostopoulou O. The impact of a diagnostic decision support system on the  
11 consultation: perceptions of GPs and patients. *BMC Medical Informatics and Decision Making*,  
12 2017;17(1):79.  
13  
14

## 15 Figure captions

16 **Figure 1: A diagrammatic summary of the development and evaluation of DOTT, including the data that**  
17 **fed the different stages and the outputs.** SEM = Stakeholder Engagement Meeting (consisting 3 focus  
18 groups); FG = Focus group; SH=Stakeholders; IPDAS = International Patient Decision Aids Standards<sup>23</sup>;  
19 SDM model = Shared decision making model for clinical practice<sup>32</sup>; SRPFG = Stroke Research Patient and  
20 Family Group<sup>31</sup>  
21

22 **Figure 2: An example screen from DOTT prototype displaying the stroke survivor's predicted stroke risk**  
23 **before and after a selected treatment (e.g., control of blood pressure).**  
24  
25  
26  
27  
28  
29  
30  
31  
32  
33  
34  
35  
36  
37  
38  
39  
40  
41  
42  
43  
44  
45  
46  
47  
48  
49  
50  
51  
52  
53  
54  
55  
56  
57  
58  
59  
60



Figure 1: A diagrammatic summary of the development and evaluation of DOTT, including the data that fed the different stages and the outputs. SEM = Stakeholder Engagement Meeting (consisting 3 focus groups); FG = Focus group; SH=Stakeholders; IPDAS = International Patient Decision Aids Standards<sup>23</sup>; SDM model = Shared decision making model for clinical practice<sup>32</sup>; SRPFG = Stroke Research Patient and Family Group<sup>31</sup>

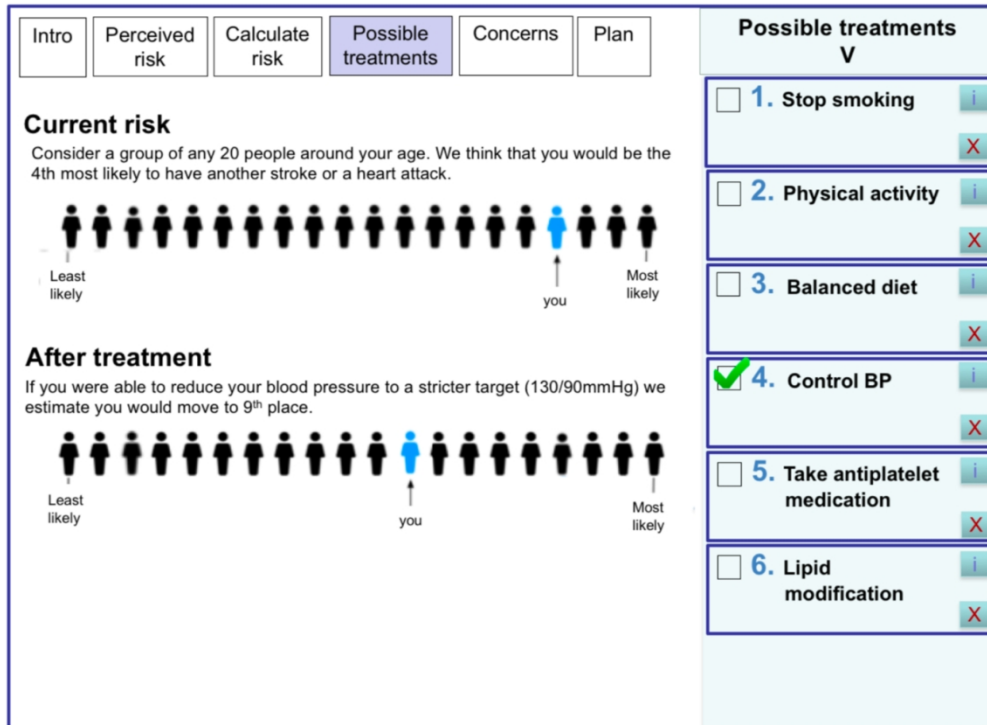

Figure 2: An example screen from DOTT prototype displaying the stroke survivor’s predicted stroke risk before and after a selected treatment (e.g., control of blood pressure).

1  
2  
3 **Box 1: Topic guide for the separate focus groups in the SEM**  
4

5 In a large group, explain:

- 6
- 7 • Study aim
  - 8 • What a LHS is, and how a LHS might work in general practice
  - 9 • The co-production approach we are using
- 10

11 In separate focus groups:

- 12
- 13 • Ask participants to provide examples of information which are/would be useful for
  - 14 patients/carers/clinicians/health commissioners?
  - 15 • Previous experiences of information delivery: What worked well? What worked badly/not so
  - 16 well?
- 17

18 Explore stakeholders' understandings around what is data linkage, and what is a learning health

19 system (LHS)?

- 20
- 21 • How would a LHS work in practice for stroke?
  - 22 • Any ethical concerns about this process (particularly regarding data linkage)? How can these be
  - 23 addressed?
  - 24 • What types of information could be generated using this method?
  - 25 • How broadly might they be delivered?
- 26

27 Discuss ideas for new information interventions

- 28
- 29 • Feedback from individual groups
- 30

31 Develop as a larger group a priority list for key priorities for data and information needs.

32

33 Note: Since a few healthcare professionals could not attend the focus groups, we conducted face-to-

34 face interviews with them using the same topic guide.

35

36

37

38

39

40

41

42

43

44

45

46

47

48

49

50

51

52

53

54

55

56

57

58

59

60



Box 2: post-usability interview - patients

- Do you have any comments about today's session? Feel free to comment on anything you want.
- How did it feel having a consultation using the decision aid?
- Who do you think should be involved in making decisions about how acceptable your risks are of having a further stroke?
  - your doctor alone
  - mostly your doctor
  - your doctor and you equally
  - mostly you
  - you alone
- Who do you think should be involved in making decisions about ways to reduce your risk of stroke?
  - your doctor alone
  - mostly your doctor
  - your doctor and you equally
  - mostly you
  - you alone
- To what extent do you agree with the following statement? (from 1 strongly disagree to 5 strongly agree)
  - The decision aid will help patients with adopting healthier behaviours, such as changing Lifestyle habits and/or taking medication according to the management plan they agreed on.
  - Having seen how the decision aid works, patients will likely look for more information about stroke and its risk factors.
- (if agreed on statement above) Can you please describe how the decision aid might support patients in changing some of their health-related habits?
- What might make it difficult (barriers, hurdles) for patients to change some of their health-related habits?
- Would you find the decision aid helpful for your own health-related habits?
- What do you like about the decision aid?
- What don't you like about the decision aid?
- What suggestions do you have to improve the decision aid?

Give Acceptability and Usability questionnaires.

# Reporting checklist for qualitative study.

Based on the SRQR guidelines.

## Instructions to authors

Complete this checklist by entering the page numbers from your manuscript where readers will find each of the items listed below.

Your article may not currently address all the items on the checklist. Please modify your text to include the missing information. If you are certain that an item does not apply, please write "n/a" and provide a short explanation.

Upload your completed checklist as an extra file when you submit to a journal.

In your methods section, say that you used the SRQR reporting guidelines, and cite them as:

O'Brien BC, Harris IB, Beckman TJ, Reed DA, Cook DA. Standards for reporting qualitative research: a synthesis of recommendations. *Acad Med.* 2014;89(9):1245-1251.

|                                            | Reporting Item                                                                                                                                                                                                                                 | Page Number |
|--------------------------------------------|------------------------------------------------------------------------------------------------------------------------------------------------------------------------------------------------------------------------------------------------|-------------|
|                                            | #1 Concise description of the nature and topic of the study identifying the study as qualitative or indicating the approach (e.g. ethnography, grounded theory) or data collection methods (e.g. interview, focus group) is recommended        | 1           |
|                                            | #2 Summary of the key elements of the study using the abstract format of the intended publication; typically includes background, purpose, methods, results and conclusions                                                                    | 2           |
| Problem formulation                        | #3 Description and significance of the problem / phenomenon studied: review of relevant theory and empirical work; problem statement                                                                                                           | 3           |
| Purpose or research question               | #4 Purpose of the study and specific objectives or questions                                                                                                                                                                                   | 4           |
| Qualitative approach and research paradigm | #5 Qualitative approach (e.g. ethnography, grounded theory, case study, phenomenology, narrative research) and guiding theory if appropriate; identifying the research paradigm (e.g. postpositivist, constructivist / interpretivist) is also | 4,5         |

recommended; rationale. The rationale should briefly discuss the justification for choosing that theory, approach, method or technique rather than other options available; the assumptions and limitations implicit in those choices and how those choices influence study conclusions and transferability. As appropriate the rationale for several items might be discussed together.

|    |                            |     |                                                                    |       |
|----|----------------------------|-----|--------------------------------------------------------------------|-------|
| 1  |                            |     |                                                                    |       |
| 2  |                            |     |                                                                    |       |
| 3  |                            |     |                                                                    |       |
| 4  |                            |     |                                                                    |       |
| 5  |                            |     |                                                                    |       |
| 6  |                            |     |                                                                    |       |
| 7  |                            |     |                                                                    |       |
| 8  |                            |     |                                                                    |       |
| 9  |                            |     |                                                                    |       |
| 10 | Researcher characteristics | #6  | Researchers' characteristics that may influence the research,      | 7     |
| 11 | and reflexivity            |     | including personal attributes, qualifications / experience,        |       |
| 12 |                            |     | relationship with participants, assumptions and / or               |       |
| 13 |                            |     | presuppositions; potential or actual interaction between           |       |
| 14 |                            |     | researchers' characteristics and the research questions,           |       |
| 15 |                            |     | approach, methods, results and / or transferability                |       |
| 16 |                            |     |                                                                    |       |
| 17 |                            |     |                                                                    |       |
| 18 |                            |     |                                                                    |       |
| 19 |                            |     |                                                                    |       |
| 20 | Context                    | #7  | Setting / site and salient contextual factors; rationale           | 4,5   |
| 21 |                            |     |                                                                    |       |
| 22 | Sampling strategy          | #8  | How and why research participants, documents, or events were       | 5     |
| 23 |                            |     | selected; criteria for deciding when no further sampling was       |       |
| 24 |                            |     | necessary (e.g. sampling saturation); rationale                    |       |
| 25 |                            |     |                                                                    |       |
| 26 |                            |     |                                                                    |       |
| 27 | Ethical issues pertaining  | #9  | Documentation of approval by an appropriate ethics review          | 5, 17 |
| 28 | to human subjects          |     | board and participant consent, or explanation for lack thereof;    |       |
| 29 |                            |     | other confidentiality and data security issues                     |       |
| 30 |                            |     |                                                                    |       |
| 31 |                            |     |                                                                    |       |
| 32 |                            |     |                                                                    |       |
| 33 | Data collection methods    | #10 | Types of data collected; details of data collection procedures     | 5,6   |
| 34 |                            |     | including (as appropriate) start and stop dates of data collection |       |
| 35 |                            |     | and analysis, iterative process, triangulation of sources /        |       |
| 36 |                            |     | methods, and modification of procedures in response to             |       |
| 37 |                            |     | evolving study findings; rationale                                 |       |
| 38 |                            |     |                                                                    |       |
| 39 |                            |     |                                                                    |       |
| 40 |                            |     |                                                                    |       |
| 41 | Data collection            | #11 | Description of instruments (e.g. interview guides,                 | 4,5,6 |
| 42 | instruments and            |     | questionnaires) and devices (e.g. audio recorders) used for data   |       |
| 43 | technologies               |     | collection; if / how the instruments(s) changed over the course    |       |
| 44 |                            |     | of the study                                                       |       |
| 45 |                            |     |                                                                    |       |
| 46 |                            |     |                                                                    |       |
| 47 |                            |     |                                                                    |       |
| 48 | Units of study             | #12 | Number and relevant characteristics of participants, documents,    | 5,6,7 |
| 49 |                            |     | or events included in the study; level of participation (could be  |       |
| 50 |                            |     | reported in results)                                               |       |
| 51 |                            |     |                                                                    |       |
| 52 |                            |     |                                                                    |       |
| 53 | Data processing            | #13 | Methods for processing data prior to and during analysis,          | 6     |
| 54 |                            |     | including transcription, data entry, data management and           |       |
| 55 |                            |     | security, verification of data integrity, data coding, and         |       |
| 56 |                            |     | anonymisation / deidentification of excerpts                       |       |
| 57 |                            |     |                                                                    |       |
| 58 |                            |     |                                                                    |       |
| 59 |                            |     |                                                                    |       |
| 60 |                            |     |                                                                    |       |

|    |                                                                                              |     |                                                                                                                                                                                                                                                                                                          |            |
|----|----------------------------------------------------------------------------------------------|-----|----------------------------------------------------------------------------------------------------------------------------------------------------------------------------------------------------------------------------------------------------------------------------------------------------------|------------|
| 1  | Data analysis                                                                                | #14 | Process by which inferences, themes, etc. were identified and developed, including the researchers involved in data analysis; usually references a specific paradigm or approach; rationale                                                                                                              | 7          |
| 2  |                                                                                              |     |                                                                                                                                                                                                                                                                                                          |            |
| 3  |                                                                                              |     |                                                                                                                                                                                                                                                                                                          |            |
| 4  |                                                                                              |     |                                                                                                                                                                                                                                                                                                          |            |
| 5  |                                                                                              |     |                                                                                                                                                                                                                                                                                                          |            |
| 6  | Techniques to enhance trustworthiness                                                        | #15 | Techniques to enhance trustworthiness and credibility of data analysis (e.g. member checking, audit trail, triangulation); rationale                                                                                                                                                                     | 7          |
| 7  |                                                                                              |     |                                                                                                                                                                                                                                                                                                          |            |
| 8  |                                                                                              |     |                                                                                                                                                                                                                                                                                                          |            |
| 9  |                                                                                              |     |                                                                                                                                                                                                                                                                                                          |            |
| 10 |                                                                                              |     |                                                                                                                                                                                                                                                                                                          |            |
| 11 | Syntheses and interpretation                                                                 | #16 | Main findings (e.g. interpretations, inferences, and themes); might include development of a theory or model, or integration with prior research or theory                                                                                                                                               | 7-10,11-13 |
| 12 |                                                                                              |     |                                                                                                                                                                                                                                                                                                          |            |
| 13 |                                                                                              |     |                                                                                                                                                                                                                                                                                                          |            |
| 14 |                                                                                              |     |                                                                                                                                                                                                                                                                                                          |            |
| 15 |                                                                                              |     |                                                                                                                                                                                                                                                                                                          |            |
| 16 |                                                                                              |     |                                                                                                                                                                                                                                                                                                          |            |
| 17 | Links to empirical data                                                                      | #17 | Evidence (e.g. quotes, field notes, text excerpts, photographs) to substantiate analytic findings                                                                                                                                                                                                        | 6-9,12-14  |
| 18 |                                                                                              |     |                                                                                                                                                                                                                                                                                                          |            |
| 19 |                                                                                              |     |                                                                                                                                                                                                                                                                                                          |            |
| 20 |                                                                                              |     |                                                                                                                                                                                                                                                                                                          |            |
| 21 | Intergration with prior work, implications, transferability and contribution(s) to the field | #18 | Short summary of main findings; explanation of how findings and conclusions connect to, support, elaborate on, or challenge conclusions of earlier scholarship; discussion of scope of application / generalizability; identification of unique contributions(s) to scholarship in a discipline or field | 14-15      |
| 22 |                                                                                              |     |                                                                                                                                                                                                                                                                                                          |            |
| 23 |                                                                                              |     |                                                                                                                                                                                                                                                                                                          |            |
| 24 |                                                                                              |     |                                                                                                                                                                                                                                                                                                          |            |
| 25 |                                                                                              |     |                                                                                                                                                                                                                                                                                                          |            |
| 26 |                                                                                              |     |                                                                                                                                                                                                                                                                                                          |            |
| 27 |                                                                                              |     |                                                                                                                                                                                                                                                                                                          |            |
| 28 |                                                                                              |     |                                                                                                                                                                                                                                                                                                          |            |
| 29 | Limitations                                                                                  | #19 | Trustworthiness and limitations of findings                                                                                                                                                                                                                                                              | 15,16      |
| 30 |                                                                                              |     |                                                                                                                                                                                                                                                                                                          |            |
| 31 | Conflicts of interest                                                                        | #20 | Potential sources of influence of perceived influence on study conduct and conclusions; how these were managed                                                                                                                                                                                           | 17         |
| 32 |                                                                                              |     |                                                                                                                                                                                                                                                                                                          |            |
| 33 |                                                                                              |     |                                                                                                                                                                                                                                                                                                          |            |
| 34 |                                                                                              |     |                                                                                                                                                                                                                                                                                                          |            |
| 35 | Funding                                                                                      | #21 | Sources of funding and other support; role of funders in data collection, interpretation and reporting                                                                                                                                                                                                   | 17         |
| 36 |                                                                                              |     |                                                                                                                                                                                                                                                                                                          |            |
| 37 |                                                                                              |     |                                                                                                                                                                                                                                                                                                          |            |
| 38 |                                                                                              |     |                                                                                                                                                                                                                                                                                                          |            |

39 The SRQR checklist is distributed with permission of Wolters Kluwer © 2014 by the Association of American  
 40 Medical Colleges. This checklist was completed on 07. March 2019 using <https://www.goodreports.org/>, a tool  
 41 made by the [EQUATOR Network](#) in collaboration with [Penelope.ai](#)  
 42  
 43  
 44  
 45  
 46  
 47  
 48  
 49  
 50  
 51  
 52  
 53  
 54  
 55  
 56  
 57  
 58  
 59  
 60
